# Supplementary material
Source: MDPI journal article supplement (https://www.mdpi.com/2071-1050/8/1/80)
Supplement: s1 [file s1]

Archive with 11 entries (11 files):
- 2013 excel data comparison new.xlsx
- CACP Excel SEU study - scope 1 and 2.xlsm
- CACP Excel template - Austin College.xlsm
- CACP Excel template - Rice.xlsm
- CACP Excel template - TAMU.xlsm
- CACP Excel template - TTU.xlsm
- CACP Excel template - U of Houston.xlsm
- CACP Excel template - UNT.xlsm
- CACP Excel template - UTA.xlsm
- CACP Excel template - UTSWMed.xlsm
- final graphs.xlsx
