# Supplementary material
Source: MDPI journal article supplement (https://www.mdpi.com/2071-1050/8/1/80)
Supplement: s1 [file s1 › 2013 excel data comparison new.xlsx]

## Sheet: 2013 data
											--- Scope 1 Emissions Sources ---
	Institutional Data										On-Campus Stationary Sources																																		Direct Transportation Sources
University	Budget - Click here to enter data			Population					Physical Size		On-Campus Cogeneration Plant(s)																			Other On-Campus Stationary Sources															University Fleet
	Operating Budget	Research Budget	Energy Budget	Full Time Students	Part-Time Students	Summer School Students	Faculty	Staff	Total Building Space	Total Research Building Space	Residual Oil (#5-6)	Distillate Oil (#1-4)	Natural Gas	LPG (Propane)	Coal (Steam Coal)	Incinerated Waste	Wood Chips	Wood Pellets	Grass Pellets	Residual BioHeat	Distillate BioHeat	Attributable Solar - Electric	Attributable Solar - Thermal	Attributable Wind	Other	Electric Output	Steam Output	Electric Efficiency	Steam Efficiency	Residual Oil (#5-6)	Distillate Oil (#1-4)	Natural Gas	LPG (Propane)	Coal (Steam Coal)	Incinerated Waste	Wood Chips	Wood Pellets	Grass Pellets	Residual BioHeat	Distillate BioHeat	Attributable Solar - Electric	Attributable Solar - Thermal	Attributable Wind	#REF!	Gasoline Fleet	Diesel Fleet	Natural Gas Fleet	E85 Fleet	B5 Fleet
	0	0	0	#	#	#	#	#	Square feet	Square feet	Gallons	Gallons	MMBtu	Gallons	Short Tons	Short Tons	Short Tons	Short Tons	Short Tons	Gallons	Gallons	kWh	MMBtu	kWh	MMBtu	kWh	MMBtu	%	%	Gallons	Gallons	MMBtu	Gallons	Short Tons	Short Tons	Short Tons	Short Tons	Short Tons	Gallons	Gallons	kWh	MMBtu	kWh	MMBtu	Gallons	Gallons	MMBtu	Gallons	Gallons
Austin College	#	#	#	1346			118	186	803474	21000																						54994													10004	1151
St. Edward's University	1.26055e+08	0	2.08247e+06	4308			201	482	1353132																							41813													15645	2273
Rice University	4.80928e+08	0	1.18226e+07	6224			820	2072	5930533				179865																			334035													20500	33000
University of North Texas	Summer School Students	Faculty	Staff	28280			2396	2481	6870000																							173511	235.4										300000		137798	133083
Texas Tech University	6.18419e+08	0	1.38494e+07	31500			8000		8400000																							567376													6800	1200
UT Soutwestern Medical Center	1.57072e+09			4600			12100		11000000																							1032424
University of Houston	7.66191e+08		2.06896e+07	41000			5000		11400000																							502653									21365			500
Texas A&M	1.03728e+09		5.74924e+07	53672			2800	5500	22692719				3145915																			3145915													303000	283000
University of Texas - Austin
[truncated: 58 more columns]

## Sheet: By BLDG
											--- Scope 1 Emissions Sources ---
	Institutional Data										On-Campus Stationary Sources																																		Direct Transportation Sources
Fiscal Year	Budget - Click here to enter data			Population					Physical Size		On-Campus Cogeneration Plant(s)																			Other On-Campus Stationary Sources															University Fleet
	Operating Budget	Research Budget	Energy Budget	Full Time Students	Part-Time Students	Summer School Students	Faculty	Staff	Total Building Space	Total Research Building Space	Residual Oil (#5-6)	Distillate Oil (#1-4)	Natural Gas	LPG (Propane)	Coal (Steam Coal)	Incinerated Waste	Wood Chips	Wood Pellets	Grass Pellets	Residual BioHeat	Distillate BioHeat	Attributable Solar - Electric	Attributable Solar - Thermal	Attributable Wind	Other	Electric Output	Steam Output	Electric Efficiency	Steam Efficiency	Residual Oil (#5-6)	Distillate Oil (#1-4)	Natural Gas	LPG (Propane)	Coal (Steam Coal)	Incinerated Waste	Wood Chips	Wood Pellets	Grass Pellets	Residual BioHeat	Distillate BioHeat	Attributable Solar - Electric	Attributable Solar - Thermal	Attributable Wind	#REF!	Gasoline Fleet	Diesel Fleet	Natural Gas Fleet	E85 Fleet	B5 Fleet
	0	0	0	#	#	#	#	#	Square feet	Square feet	Gallons	Gallons	MMBtu	Gallons	Short Tons	Short Tons	Short Tons	Short Tons	Short Tons	Gallons	Gallons	kWh	MMBtu	kWh	MMBtu	kWh	MMBtu	%	%	Gallons	Gallons	MMBtu	Gallons	Short Tons	Short Tons	Short Tons	Short Tons	Short Tons	Gallons	Gallons	kWh	MMBtu	kWh	MMBtu	Gallons	Gallons	MMBtu	Gallons	Gallons
Austin College	#	#	#	1346			118	186	803474	21000																						54994													10004	1151
St. Edward's University	1.26055e+08	0	2.08247e+06	4308			201	482	1353132																							41813													15645	2273
Rice University	4.80928e+08	0	1.18226e+07	6224			820	2072	5930533				179865																			334035													20500	33000
University of North Texas	Summer School Students	Faculty	Staff	28280			2396	2481	6870000																							173511	235.4										300000		137798	133083
Texas Tech University	6.18419e+08	0	1.38494e+07	31500			8000		8400000																							567376													6800	1200
UT Soutwestern Medical Center	1.57072e+09			4600			12100		11000000																							1032424
University of Houston	7.66191e+08		2.06896e+07	41000			5000		11400000																							502653									21365			500
Texas A&M	1.03728e+09		5.74924e+07	53672			2800	5500	22692719				3145915																			3145915													303000	283000
[truncated: 52 more columns]

## Sheet: Sheet12
	2008	2013
Scope 1	2215	2833.1
Scope 2	10194	9305.7
Scope 3	4338	3514.9
Total	13044	11950.7
	1148.31	1353.13
	1.92892	2.09374
	8.87738	6.87716
	3.77772	2.5976
	11.3593	8.83188
