# Supplementary material
Source: MDPI journal article supplement (https://www.mdpi.com/2071-1050/8/1/80)
Supplement: s1 [file s1 › CACP Excel SEU study - scope 1 and 2.xlsm]

## Sheet: User_Agreement
	v6.9
	©2001-2010 Clean Air-Cool Planet, Inc. All rights reserved
	Clean Air-Cool Planet, Campus Carbon Calculator, and the Clean Air-Cool Planet logo are trademarks of Clean Air-Cool Planet, Inc.
	USERS' AGREEMENT
	By using Clean Air-Cool Planet’s Campus Carbon Calculator, you are agreeing to specific terms and conditions:
	1. The Campus Carbon Calculator is designed to help campus staff, faculty, students and administrators document, understand, project, and reduce the campus greenhouse gas footprint. The Calculator can help a campus in taking the first steps toward a comprehensive Climate Action or Climate Neutrality Plan. Organizations or entities wishing to use the Calculator for other purposes should contact CA…
	2. When presenting the results of your campus greenhouse gas inventory, whether in written reports or spoken presentations, please credit the “Clean Air-Cool Planet Campus Carbon Calculator” as a tool you used to complete this task.
	3. Many campuses want to share the results of the inventory with their constituents and the general public once they’ve completed it. Whether or not you are making your inventory public, download and use of the Calculator implies willingness to share results of the inventory with CA-CP, only for purposes of aggregating U.S. campus inventory results. Results are expected to be shared upon completi…
	4. CA-CP will not be responsible for verifying your results from the Campus Carbon Calculator, and assumes no liability for your inventory results, or their use on your campus.
	I UNDERSTAND AND AM WILLING TO ABIDE BY THESE TERMS. I WISH TO PROCEED.
	Originally developed by Adam Wilson as a collaborative project between the University of New Hampshire's Office of Sustainability and Clean Air-Cool Planet in 2001. Version 4.0 was updated to version 5.0 by Jordan Macy and Jennifer Schroeder in '05-'06. Version 5.0 was updated to version 6.0 by Claire Roby, Ian Hough, Jason Kowalski, Lisa Weil, Tai Young Taft, and Jennifer (Schroeder) Andrews in …
	Acknowledgments:
	CA-CP would first like to extend gratitude and acknowledgement to one of our first, and best, partners - the University of New Hampshire. Their integral role in the creation of this tool is a great example of the power schools have to help accelerate the pace of change by solving problems on their own campuses while being mindful of the potential for creating models to light the way for others. T…
	The planning elements of the tool were inspired by the good work of students at Middlebury College (MiddShift), University of California Santa Barbara (NAELS Climate Neutral project), and the efforts of Duke University as presented by then-Sustainability Coordinator Sam Hummel in his "Charting a Path to Greenhouse Gas Reductions" paper at the Ball State Greening of the Campus conference in 2005. …
	CA-CP would also like to extend sincere thanks for the invaluable review, assistance and/or collaboration offered over the years by the following individuals and organizations: Julian Dautremont-Smith of the Association for the Advancement of Sustainability in Higher Education (AASHE); the team over at the World Resources Institute, including Jennifer Layke, Samantha Putt del Pino, Ryan Levinson …

## Sheet: Introduction
©2001-2012 Clean Air-Cool Planet, Inc. All Rights Reserved
	Clean Air-Cool Planet, Campus Carbon Calculator, and the Clean Air-Cool Planet logo are trademarks of Clean Air-Cool Planet, Inc.
					www.cleanair-coolplanet.org
					University	St. Edward's University
					Contact Name	Thomas LaPoint		Note: v6.85 can automatically transfer your data from previous v6 files. Scroll down for instructions
					Title	Graduate Sustainability Asst.
					Organization	St. Edward's University
					State
					Phone	530-295-7941
					Fax
					E-Mail	tlapoin2@stedwards.edu
					Getting Started
					Navigating the Calculator
					Background Information
					Color Coding
					Using the Calculator
					Updating from Previous Calculator Files
												Use these buttons if your old file has an .xls file extension (older version of Excel)
												Use these buttons if your old file has an .xlsx file extension (newer version of Excel)
												Use these buttons if your old file has an .xls file extension (older version of Excel)
												Use these buttons if your old file has an .xlsx file extension (newer version of Excel)

## Sheet: Spreadsheet_Map
©2001-2012 Clean Air-Cool Planet, Inc. All rights reserved.
Clean Air-Cool Planet, Campus Carbon Calculator, and the Clean Air-Cool Planet logo are trademarks of Clean Air-Cool Planet, Inc.
				INPUTS			EMISSIONS FACTORS					CALCULATIONS						RESULTS					GRAPHS
	REFERENCE MODULE

## Sheet: Input
		On this Worksheet: Enter data related to emissions. If a column does not apply or the data is unavailable, leave it blank.
		MODULE	Input
		WORKSHEET	Input: Enter emissions source activity and institutional data
		UNIVERSITY	St. Edward's University
													--- Scope 1 Emissions Sources ---
			Institutional Data										On-Campus Stationary Sources																																		Direct Transportation Sources
		Fiscal Year	Budget - Click here to enter data			Population					Physical Size		On-Campus Cogeneration Plant(s)																			Other On-Campus Stationary Sources															University Fleet
			Operating Budget	Research Budget	Energy Budget	Full Time Students	Part-Time Students	Summer School Students	Faculty	Staff	Total Building Space	Total Research Building Space	Residual Oil (#5-6)	Distillate Oil (#1-4)	Natural Gas	LPG (Propane)	Coal (Steam Coal)	Incinerated Waste	Wood Chips	Wood Pellets	Grass Pellets	Residual BioHeat	Distillate BioHeat	Attributable Solar - Electric	Attributable Solar - Thermal	Attributable Wind	Other	Electric Output	Steam Output	Electric Efficiency	Steam Efficiency	Residual Oil (#5-6)	Distillate Oil (#1-4)	Natural Gas	LPG (Propane)	Coal (Steam Coal)	Incinerated Waste	Wood Chips	Wood Pellets	Grass Pellets	Residual BioHeat	Distillate BioHeat	Attributable Solar - Electric	Attributable Solar - Thermal	Attributable Wind	Other	Gasoline Fleet	Diesel Fleet	Natural Gas Fleet
			$ (2005)	$ (2005)	$ (2005)	#	#	#	#	#	Square feet	Square feet	Gallons	Gallons	MMBtu	Gallons	Short Tons	Short Tons	Short Tons	Short Tons	Short Tons	Gallons	Gallons	kWh	MMBtu	kWh	MMBtu	kWh	MMBtu	%	%	Gallons	Gallons	MMBtu	Gallons	Short Tons	Short Tons	Short Tons	Short Tons	Short Tons	Gallons	Gallons	kWh	MMBtu	kWh	MMBtu	Gallons	Gallons	MMBtu
		1990	0	0	0
		1991	0	0	0
		1992	0	0	0
		1993	0	0	0
		1994	0	0	0
		1995	0	0	0
		1996	0	0	0
		1997	0	0	0
		1998	0	0	0	2717			215	321
		1999	0	0	0	2870			255	340																								19665.3
		2000	0	0	1.23593e+06	3044			299	368																								19256.9
		2001	0	0	1.28047e+06	3302.5			315	376	688971																							29341.3
		2002	0	0	1.16147e+06	3383.5			341	397	696527																							25068
		2003	0	0	1.30136e+06	3528			353	435	756869																							27371.7
		2004	6.08608e+07	0	1.46025e+06	3740			382	437	756869																							24693.1
		2005	62887302	0	1369100	4056			402	453	821370																							20327.8
		2006	6.93669e+07	0	1.78129e+06	4309			444	472	885298																							26902
		2007	7.34044e+07	0	2.21501e+06	4402			463	497	1137062																							35248.3
		2008	7.7147e+07	0	2.8576e+06	4482			469	495	1148312																							37022													15446	613
		2009	0	0	0
		2010	0	0	0
		2011	0	0	0
		2012	0	0	0
		2013	1.26055e+08	0	2.08247e+06	4308			201	482	1353132																							41813													15645	2273
		2014	0	0	0
			data for the categories that differ in the		ACUPCC Reporting Worksheet.		For guidance reference the		ACUPCC Implementation Guide (pdf).
	©2001-2012 Clean Air-Cool Planet, Inc. All rights reserved
	Clean Air-Cool Planet, Campus Carbon Calculator, and the Clean Air-Cool Planet logo are trademarks of Clean Air-Cool Planet, Inc.
[truncated: 74 more columns]

## Sheet: Input_InflAdj
	On this Worksheet: Original budget values, and values adjusted for inflation
	MODULE	Input
	WORKSHEET	Inflation Adjustment: Enter your budget values in the left-hand columns and they will be adjusted for inflation.
	UNIVERSITY	St. Edward's University
		Budget			Conversion	Budget Adjusted for Inflation
	Fiscal Year	Operating Budget	Research Dollars	Energy Budget	Deflator	Operating Budget	Research Dollars	Energy Budget
		$	$	$	$ (2005)	$	$	$
	1990				0.722	0	0	0
	1991				0.74726	0	0	0
	1992				0.76444	0	0	0
	1993				0.7821	0	0	0
	1994				0.79872	0	0	0
	1995				0.81506	0	0	0
	1996				0.83051	0	0	0
	1997				0.84433	0	0	0
	1998				0.8537	0	0	0
	1999				0.86605	0	0	0
	2000			1093700	0.88492	0	0	1.23593e+06
	2001			1160300	0.90615	0	0	1.28047e+06
	2002			1070836	0.92197	0	0	1.16147e+06
	2003			1225346	0.94159	0	0	1.30136e+06
	2004	58933367		1414005	0.96833	6.08608e+07	0	1.46025e+06
	2005	62887302		1369100	1	62887302	0	1369100
	2006	71554008		1837458	1.03153	6.93669e+07	0	1.78129e+06
	2007	77725699		2345408	1.05887	7.34044e+07	0	2.21501e+06
	2008	83399809		3089212	1.08105	7.7147e+07	0	2.8576e+06
	2009				1.10057	0	0	0
	2010				1.12153	0	0	0
	2011				1.14197	0	0	0
	2012				1.16329	0	0	0
	2013	149270000		2466000	1.18417	1.26055e+08	0	2.08247e+06
	2014				1.20462	0	0	0
	2015				1.22491	0	0	0
	2016				1.24577	0	0	0
	2017				1.26744	0	0	0
	2018				1.28932	0	0	0
	2019				1.31211	0	0	0
	2020				1.33541	0	0	0
	2021				1.35953	0	0	0
	2022				1.3855	0	0	0
	2023				1.41322	0	0	0
	2024				1.44201	0	0	0
	2025				1.47204	0	0	0
	2026				1.5028	0	0	0
	2027				1.53356	0	0	0
	2028				1.56401	0	0	0
	2029				1.59483	0	0	0
	2030				1.6261	0	0	0
	2031				1.64834	0	0	0
	2032				1.67059	0	0	0
	2033				1.69283	0	0	0
	2034				1.71508	0	0	0
	2035				1.73732	0	0	0
	2036				1.75956	0	0	0
	2037				1.78181	0	0	0
	2038				1.80405	0	0	0
	2039				1.8263	0	0	0
	2040				1.84854	0	0	0
	2041				1.87078	0	0	0
	2042				1.89303	0	0	0
	2043				1.91527	0	0	0
	2044				1.93752	0	0	0
	2045				1.95976	0	0	0
	2046				1.98201	0	0	0
	2047				2.00425	0	0	0
	2048				2.02649	0	0	0
	2049				2.04874	0	0	0
	2050				2.07098	0	0	0
	2051				2.09323	0	0	0
	2052				2.11547	0	0	0
	2053				2.13771	0	0	0
	2054				2.15996	0	0	0
	2055				2.1822	0	0	0
	2056				2.20445	0	0	0
	2057				2.22669	0	0	0
	2058				2.24893	0	0	0
	2059				2.27118	0	0	0
	2060				2.29342	0	0	0
	Source:				19
	Source 2:				20
				Slope	0.0222441
©2001-2010 Clean Air-Cool Planet, Inc. All rights reserved
Clean Air-Cool Planet, Campus Carbon Calculator, and the Clean Air-Cool Planet logo are trademarks of Clean Air-Cool Planet, Inc.

## Sheet: CustFuelMix
	On this Worksheet: If you know the exact fuel mix of your electric utility, enter it on this sheet.
	MODULE	Input
	WORKSHEET	Custom Fuel Mix
	UNIVERSITY	St. Edward's University
	Fiscal Year	Total Electricity Purchased	Net Purchased	Coal	Natural Gas	Distillate Oil (#1-#4)	Residual Oil (#5-#6)	Nuclear	Waste to Energy	Hydro-Electric	Biomass	Renewable (wind, solar)	Total Percentage
		(kWh)	(%)	(%)	(%)	(%)	(%)	(%)	(%)	(%)	(%)	(%)	(%)
	1990	0											0
	1991	0											0
	1992	0											0
	1993	0											0
	1994	0											0
	1995	0											0
	1996	0											0
	1997	0											0
	1998	0											0
	1999	9510100											0
	2000	11132479											0
	2001	11120341											0
	2002	10662593											0
	2003	11127780											0
	2004	11506239											0
	2005	12056239											0
	2006	13562885											0
	2007	15850625											0
	2008	17859607		0.37	0.46			0.14				0.03	1
	2009	0											0
	2010	0											0
	2011	0											0
	2012	0											0
	2013	17275811	0.005	0.372	0.405			0.116	0.002	0.001		0.099	1
	2014	1.89836e+07	0.005	0.372	0.405	0	0	0.116	0.002	0.001	0	0.099	1
	2015	1.96171e+07	0.005	0.372	0.405	0	0	0.116	0.002	0.001	0	0.099	1
	2016	2.02507e+07	0.005	0.372	0.405	0	0	0.116	0.002	0.001	0	0.099	1
	2017	2.08842e+07	0.005	0.372	0.405	0	0	0.116	0.002	0.001	0	0.099	1
	2018	2.15178e+07	0.005	0.372	0.405	0	0	0.116	0.002	0.001	0	0.099	1
	2019	2.21513e+07	0.005	0.372	0.405	0	0	0.116	0.002	0.001	0	0.099	1
	2020	2.27848e+07	0.005	0.372	0.405	0	0	0.116	0.002	0.001	0	0.099	1
	2021	2.34184e+07	0.005	0.372	0.405	0	0	0.116	0.002	0.001	0	0.099	1
	2022	2.40519e+07	0.005	0.372	0.405	0	0	0.116	0.002	0.001	0	0.099	1
	2023	2.46855e+07	0.005	0.372	0.405	0	0	0.116	0.002	0.001	0	0.099	1
	2024	2.5319e+07	0.005	0.372	0.405	0	0	0.116	0.002	0.001	0	0.099	1
	2025	2.59525e+07	0.005	0.372	0.405	0	0	0.116	0.002	0.001	0	0.099	1
	2026	2.65861e+07	0.005	0.372	0.405	0	0	0.116	0.002	0.001	0	0.099	1
	2027	2.72196e+07	0.005	0.372	0.405	0	0	0.116	0.002	0.001	0	0.099	1
	2028	2.78531e+07	0.005	0.372	0.405	0	0	0.116	0.002	0.001	0	0.099	1
	2029	2.84867e+07	0.005	0.372	0.405	0	0	0.116	0.002	0.001	0	0.099	1
	2030	2.91202e+07	0.005	0.372	0.405	0	0	0.116	0.002	0.001	0	0.099	1
	2031	2.97538e+07	0.005	0.372	0.405	0	0	0.116	0.002	0.001	0	0.099	1
	2032	3.03873e+07	0.005	0.372	0.405	0	0	0.116	0.002	0.001	0	0.099	1
	2033	3.10208e+07	0.005	0.372	0.405	0	0	0.116	0.002	0.001	0	0.099	1
	2034	3.16544e+07	0.005	0.372	0.405	0	0	0.116	0.002	0.001	0	0.099	1
	2035	3.22879e+07	0.005	0.372	0.405	0	0	0.116	0.002	0.001	0	0.099	1
	2036	3.29214e+07	0.005	0.372	0.405	0	0	0.116	0.002	0.001	0	0.099	1
	2037	3.3555e+07	0.005	0.372	0.405	0	0	0.116	0.002	0.001	0	0.099	1
	2038	3.41885e+07	0.005	0.372	0.405	0	0	0.116	0.002	0.001	0	0.099	1
	2039	3.48221e+07	0.005	0.372	0.405	0	0	0.116	0.002	0.001	0	0.099	1
	2040	3.54556e+07	0.005	0.372	0.405	0	0	0.116	0.002	0.001	0	0.099	1
	2041	3.60891e+07	0.005	0.372	0.405	0	0	0.116	0.002	0.001	0	0.099	1
	2042	3.67227e+07	0.005	0.372	0.405	0	0	0.116	0.002	0.001	0	0.099	1
	2043	3.73562e+07	0.005	0.372	0.405	0	0	0.116	0.002	0.001	0	0.099	1
	2044	3.79897e+07	0.005	0.372	0.405	0	0	0.116	0.002	0.001	0	0.099	1
	2045	3.86233e+07	0.005	0.372	0.405	0	0	0.116	0.002	0.001	0	0.099	1
	2046	3.92568e+07	0.005	0.372	0.405	0	0	0.116	0.002	0.001	0	0.099	1
	2047	3.98904e+07	0.005	0.372	0.405	0	0	0.116	0.002	0.001	0	0.099	1
	2048	4.05239e+07	0.005	0.372	0.405	0	0	0.116	0.002	0.001	0	0.099	1
	2049	4.11574e+07	0.005	0.372	0.405	0	0	0.116	0.002	0.001	0	0.099	1
	2050	4.1791e+07	0.005	0.372	0.405	0	0	0.116	0.002	0.001	0	0.099	1
	2051	4.24245e+07	0.005	0.372	0.405	0	0	0.116	0.002	0.001	0	0.099	1
	2052	4.3058e+07	0.005	0.372	0.405	0	0	0.116	0.002	0.001	0	0.099	1
	2053	4.36916e+07	0.005	0.372	0.405	0	0	0.116	0.002	0.001	0	0.099	1
	2054	4.43251e+07	0.005	0.372	0.405	0	0	0.116	0.002	0.001	0	0.099	1
	2055	4.49587e+07	0.005	0.372	0.405	0	0	0.116	0.002	0.001	0	0.099	1
	2056	4.55922e+07	0.005	0.372	0.405	0	0	0.116	0.002	0.001	0	0.099	1
	2057	4.62257e+07	0.005	0.372	0.405	0	0	0.116	0.002	0.001	0	0.099	1
	2058	4.68593e+07	0.005	0.372	0.405	0	0	0.116	0.002	0.001	0	0.099	1
	2059	4.74928e+07	0.005	0.372	0.405	0	0	0.116	0.002	0.001	0	0.099	1
	2060	4.81264e+07	0.005	0.372	0.405	0	0	0.116	0.002	0.001	0	0.099	1
	©2001-2010 Clean Air-Cool Planet, Inc. All rights reserved
	Clean Air-Cool Planet, Campus Carbon Calculator, and the Clean Air-Cool Planet logo are trademarks of Clean Air-Cool Planet, Inc.

## Sheet: Input_Commuter
	On this Worksheet: Estimates of commuter miles traveled for faculty, staff, and students.
	MODULE	Input
	WORKSHEET	Commuter Traffic
	UNIVERSITY	St. Edward's University
		STUDENTS																								Summary - Students													FACULTY
		1) Trips / Week			2) Weeks / Year	3) Trip Distribution (% Trips by Mode)								4) Trip Distance (Miles per One-Way Trip for Each Mode)							Fuel Efficiencies Used in Calculations					Summary - Students													1) Trips / Week			2) Weeks / Year	3) Trip Distribution (% Trips by Mode)
	Fiscal Year	Students Commuters	One-Way Trips / Week	Total Commuter Trips / Week	Weeks / Year	Bike	Walk	Drive Alone	Carpool	Bus	Light Rail	Commuter Rail	Total	Bike	Walk	Drive Alone	Carpool	Bus	Light Rail	Commuter Rail	Automobile Fuel Efficiency	Bus fuel efficiency	Light rail fuel efficiency	Commuter rail fuel efficiency - diesel	Commuter rail fuel efficiency - electric	Biking		Walking		Automobile Commuting		Bus Commuting		Light Rail Commuting		Commuter Rail Commuting			Faculty Commuters	One-Way Trips / Week	Total Commuter Trips / Week	Weeks / Year	Bike	Walk	Drive Alone	Carpool	Bus	Light Rail	Commuter Rail
		#	#	#	#	%	%	%	%	%	%	%	%	Passenger Miles	Passenger Miles	Vehicle Miles	Vehicle Miles	Passenger Miles	Passenger Miles	Passenger Miles	MPG	MPG / Passenger	Passenger Miles / kWh	Passenger Miles / Gallon	Passenger Miles / kWh	Total Miles	Fuel Consumed	Total Miles	Fuel Consumed	Total Miles	Gallons Gasoline	Total Miles	Gallons Diesel	Total Miles	kWh	Total Miles	Gallons Diesel	kWh	#	#	#	#	%	%	%	%	%	%	%
	1990			0									0								20.9246	37.2564	3.48368	134.432	5.77651	0	0	0	0	0	0	0	0	0	0	0	0	0			0
	1991			0									0								21.7646	36.8152	3.29358	135.211	5.92736	0	0	0	0	0	0	0	0	0	0	0	0	0			0
	1992			0									0								21.6014	34.3485	3.22751	133.21	6.51246	0	0	0	0	0	0	0	0	0	0	0	0	0			0
	1993			0									0								21.121	35.1669	3.12276	116.12	5.80268	0	0	0	0	0	0	0	0	0	0	0	0	0			0
	1994			0									0								21.2756	33.3272	2.93051	129.176	6.42765	0	0	0	0	0	0	0	0	0	0	0	0	0			0
	1995			0									0								21.693	32.5702	2.82543	130.724	6.57941	0	0	0	0	0	0	0	0	0	0	0	0	0			0
	1996			0									0								21.7836	32.2517	2.77661	134.937	6.65418	0	0	0	0	0	0	0	0	0	0	0	0	0			0
	1997			0									0								22.0333	33.3783	2.78512	127.194	6.32913	0	0	0	0	0	0	0	0	0	0	0	0	0			0
	1998			0									0								22.1453	33.595	2.92791	125.78	6.70054	0	0	0	0	0	0	0	0	0	0	0	0	0			0
	1999			0									0								21.9717	33.9135	2.93791	120.074	6.63086	0	0	0	0	0	0	0	0	0	0	0	0	0			0
	2000			0									0								22.4648	32.5042	2.66026	132.763	6.86277	0	0	0	0	0	0	0	0	0	0	0	0	0			0
	2001			0									0								22.7378	33.0713	2.50177	132.236	7.0517	0	0	0	0	0	0	0	0	0	0	0	0	0			0
	2002			0									0								22.5956	32.7969	2.487	130.465	7.12444	0	0	0	0	0	0	0	0	0	0	0	0	0			0
	2003			0									0								22.8151	31.8652	2.5957	132.279	6.91179	0	0	0	0	0	0	0	0	0	0	0	0	0			0
	2004			0									0								23.221	30.6268	2.48549	134.988	6.70738	0	0	0	0	0	0	0	0	0	0	0	0	0			0
	2005			0									0								22.9368	31.6891	2.48375	123.485	6.38342	0	0	0	0	0	0	0	0	0	0	0	0	0			0
	2006			0									0								23.4232	30.8878	2.53696	131.819	7.01015	0	0	0	0	0	0	0	0	0	0	0	0	0			0
	2007			0									0								24.1267	31.7601	2.57558	138.203	6.32615	0	0	0	0	0	0	0	0	0	0	0	0	0			0
	2008			0									0								24.2556	32.3558	2.56246	132.323	6.43132	0	0	0	0	0	0	0	0	0	0	0	0	0			0
	2009			0									0								24.1748	31.9319	2.71172	118.232	6.31011	0	0	0	0	0	0	0	0	0	0	0	0	0			0
	2010			0									0								24.1702	31.9319	2.65975	116.674	6.0512	0	0	0	0	0	0	0	0	0	0	0	0	0			0
	2011			0									0								24.1702	31.9319	2.65975	116.674	6.0512	0	0	0	0	0	0	0	0	0	0	0	0	0			0
	2012			0									0								24.1702	31.9319	2.65975	116.674	6.0512	0	0	0	0	0	0	0	0	0	0	0	0	0			0
	2013			0									0								24.1702	31.9319	2.65975	116.674	6.0512	0	0	0	0	0	0	0	0	0	0	0	0	0			0
	2014			0									0								24.1702	31.9319	2.65975	116.674	6.0512	0	0	0	0	0	0	0	0	0	0	0	0	0			0
	2015			0									0								24.1702	31.9319	2.65975	116.674	6.0512	0	0	0	0	0	0	0	0	0	0	0	0	0			0
	2016			0									0								24.1702	31.9319	2.65975	116.674	6.0512	0	0	0	0	0	0	0	0	0	0	0	0	0			0
	2017			0									0								24.1702	31.9319	2.65975	116.674	6.0512	0	0	0	0	0	0	0	0	0	0	0	0	0			0
	2018			0									0								24.1702	31.9319	2.65975	116.674	6.0512	0	0	0	0	0	0	0	0	0	0	0	0	0			0
	2019			0									0								24.1702	31.9319	2.65975	116.674	6.0512	0	0	0	0	0	0	0	0	0	0	0	0	0			0
	2020			0									0								24.1702	31.9319	2.65975	116.674	6.0512	0	0	0	0	0	0	0	0	0	0	0	0	0			0
	2021			0									0								24.1702	31.9319	2.65975	116.674	6.0512	0	0	0	0	0	0	0	0	0	0	0	0	0			0
	2022			0									0								24.1702	31.9319	2.65975	116.674	6.0512	0	0	0	0	0	0	0	0	0	0	0	0	0			0
	2023			0									0								24.1702	31.9319	2.65975	116.674	6.0512	0	0	0	0	0	0	0	0	0	0	0	0	0			0
	2024			0									0								24.1702	31.9319	2.65975	116.674	6.0512	0	0	0	0	0	0	0	0	0	0	0	0	0			0
	2025			0									0								24.1702	31.9319	2.65975	116.674	6.0512	0	0	0	0	0	0	0	0	0	0	0	0	0			0
	2026			0									0								24.1702	31.9319	2.65975	116.674	6.0512	0	0	0	0	0	0	0	0	0	0	0	0	0			0
	2027			0									0								24.1702	31.9319	2.65975	116.674	6.0512	0	0	0	0	0	0	0	0	0	0	0	0	0			0
	2028			0									0								24.1702	31.9319	2.65975	116.674	6.0512	0	0	0	0	0	0	0	0	0	0	0	0	0			0
	2029			0									0								24.1702	31.9319	2.65975	116.674	6.0512	0	0	0	0	0	0	0	0	0	0	0	0	0			0
	2030			0									0								24.1702	31.9319	2.65975	116.674	6.0512	0	0	0	0	0	0	0	0	0	0	0	0	0			0
	2031			0									0								24.1702	31.9319	2.65975	116.674	6.0512	0	0	0	0	0	0	0	0	0	0	0	0	0			0
	2032			0									0								24.1702	31.9319	2.65975	116.674	6.0512	0	0	0	0	0	0	0	0	0	0	0	0	0			0
	2033			0									0								24.1702	31.9319	2.65975	116.674	6.0512	0	0	0	0	0	0	0	0	0	0	0	0	0			0
	2034			0									0								24.1702	31.9319	2.65975	116.674	6.0512	0	0	0	0	0	0	0	0	0	0	0	0	0			0
	2035			0									0								24.1702	31.9319	2.65975	116.674	6.0512	0	0	0	0	0	0	0	0	0	0	0	0	0			0
	2036			0									0								24.1702	31.9319	2.65975	116.674	6.0512	0	0	0	0	0	0	0	0	0	0	0	0	0			0
	2037			0									0								24.1702	31.9319	2.65975	116.674	6.0512	0	0	0	0	0	0	0	0	0	0	0	0	0			0
	2038			0									0								24.1702	31.9319	2.65975	116.674	6.0512	0	0	0	0	0	0	0	0	0	0	0	0	0			0
	2039			0									0								24.1702	31.9319	2.65975	116.674	6.0512	0	0	0	0	0	0	0	0	0	0	0	0	0			0
	2040			0									0								24.1702	31.9319	2.65975	116.674	6.0512	0	0	0	0	0	0	0	0	0	0	0	0	0			0
	2041			0									0								24.1702	31.9319	2.65975	116.674	6.0512	0	0	0	0	0	0	0	0	0	0	0	0	0			0
	2042			0									0								24.1702	31.9319	2.65975	116.674	6.0512	0	0	0	0	0	0	0	0	0	0	0	0	0			0
	2043			0									0								24.1702	31.9319	2.65975	116.674	6.0512	0	0	0	0	0	0	0	0	0	0	0	0	0			0
	2044			0									0								24.1702	31.9319	2.65975	116.674	6.0512	0	0	0	0	0	0	0	0	0	0	0	0	0			0
	2045			0									0								24.1702	31.9319	2.65975	116.674	6.0512	0	0	0	0	0	0	0	0	0	0	0	0	0			0
	2046			0									0								24.1702	31.9319	2.65975	116.674	6.0512	0	0	0	0	0	0	0	0	0	0	0	0	0			0
	2047			0									0								24.1702	31.9319	2.65975	116.674	6.0512	0	0	0	0	0	0	0	0	0	0	0	0	0			0
	2048			0									0								24.1702	31.9319	2.65975	116.674	6.0512	0	0	0	0	0	0	0	0	0	0	0	0	0			0
	2049			0									0								24.1702	31.9319	2.65975	116.674	6.0512	0	0	0	0	0	0	0	0	0	0	0	0	0			0
	2050			0									0								24.1702	31.9319	2.65975	116.674	6.0512	0	0	0	0	0	0	0	0	0	0	0	0	0			0
	2051			0									0								24.1702	31.9319	2.65975	116.674	6.0512	0	0	0	0	0	0	0	0	0	0	0	0	0			0
	2052			0									0								24.1702	31.9319	2.65975	116.674	6.0512	0	0	0	0	0	0	0	0	0	0	0	0	0			0
	2053			0									0								24.1702	31.9319	2.65975	116.674	6.0512	0	0	0	0	0	0	0	0	0	0	0	0	0			0
	2054			0									0								24.1702	31.9319	2.65975	116.674	6.0512	0	0	0	0	0	0	0	0	0	0	0	0	0			0
	2055			0									0								24.1702	31.9319	2.65975	116.674	6.0512	0	0	0	0	0	0	0	0	0	0	0	0	0			0
	2056			0									0								24.1702	31.9319	2.65975	116.674	6.0512	0	0	0	0	0	0	0	0	0	0	0	0	0			0
	2057			0									0								24.1702	31.9319	2.65975	116.674	6.0512	0	0	0	0	0	0	0	0	0	0	0	0	0			0
	2058			0									0								24.1702	31.9319	2.65975	116.674	6.0512	0	0	0	0	0	0	0	0	0	0	0	0	0			0
	2059			0									0								24.1702	31.9319	2.65975	116.674	6.0512	0	0	0	0	0	0	0	0	0	0	0	0	0			0
	2060			0									0								24.1702	31.9319	2.65975	116.674	6.0512	0	0	0	0	0	0	0	0	0	0	0	0	0			0
				Total Commuter Trips / Week = Number of Commuters * One-Way Trips / Week									Total % Mode Splits = Sum of all % Trips Made by Each Mode								3	3	35	35	35	Total Distance = Total Trips / Week * Weeks / Year * % Trips by Bike * Miles / Trip	Assuming bikers do not use any fuel.	Total Distance = Total Trips / Week * Weeks / Year * % Trips by Foot * Miles / Trip	Assuming pedestrians do not use any fuel.	Total Distance = ((Total Trips / Week * Weeks / Year * % Trips Driven Alone * Miles / Trip) + (Total Trips / Week * Weeks / Year * % Carpool * Miles / Trip % Carpool)/2)	Fuel Consumption = Total Distance / Fuel Efficiency	Total Distance = Total Trips / Week * Weeks / Year * % Trips by Bus * Miles / Trip	Fuel Consumption = Total Distance / Fuel Efficiency	Total Distance = Total Trips / Week * Weeks / Year * % Trips by Light Rail * Miles / Trip	Fuel Consumption = Total Distance / Fuel Efficiency	Total Distance = Total Trips / Week * Weeks / Year * % Trips by Commuter Rail * Miles / Trip	Fuel Consumption = Total Distance / Fuel Efficiency	Fuel Consumption = Total Distance / Fuel Efficiency			Total Commuter Trips / Week = Number of Commuters * One-Way Trips / Week
	©2001-2010 Clean Air-Cool Planet, Inc. All rights reserved
	Clean Air-Cool Planet, Campus Carbon Calculator, and the Clean Air-Cool Planet logo are trademarks of Clean Air-Cool Planet, Inc.
[truncated: 76 more columns]

## Sheet: S_CO2
	On this Worksheet: CO2 emissions from all sources. These numbers are the product of the emission factor and the input data. Some sources have no formulas because they have no CO2 emissions, but are included to keep formatting consistent.
	MODULE	Summary
	WORKSHEET	CO2
	UNIVERSITY	St. Edward's University
		--- Scope 1 Emissions Sources ---
		On-Campus Stationary Sources																														Direct Transportation Sources										Refrigerants & Chemicals						Agriculture Sources
	Fiscal Year	On-Campus Cogeneration Plant(s)															Other On-Campus Stationary Sources															University Fleet										Refrigerants & Chemicals						Fertilizer
		Residual Oil (#5-6)	Distillate Oil (#1-4)	Natural Gas	LPG (Propane)	Coal (Steam Coal)	Incinerated Waste	Wood Chips	Wood Pellets	Grass Pellets	Residual BioHeat	Distillate BioHeat	Attributable Solar - Electric	Attributable Solar - Thermal	Attributable Wind	Other Biogenic	Residual Oil (#5-6)	Distillate Oil (#1-4)	Natural Gas	LPG (Propane)	Coal (Steam Coal)	Incinerated Waste	Wood Chips	Wood Pellets	Grass Pellets	Residual BioHeat	Distillate BioHeat	Attributable Solar - Electric	Attributable Solar - Thermal	Attributable Wind	Other Biogenic	Gasoline Fleet	Diesel Fleet	Natural Gas Fleet	E85 Fleet	B5 Fleet	B20 Fleet	B100	Hydrogen	Other Fleet Fuel	Electric Fleet	R-11	HFC-134a	HCFC-22	R410a	HG-10	Isceon MO99	Synthetic	Organic
		kg CO2	kg CO2	kg CO2	kg CO2	kg CO2	kg CO2	kg CO2	kg CO2	kg CO2	kg CO2	kg CO2	kWh	MMBtu	kWh	kg CO2	kg CO2	kg CO2	kg CO2	kg CO2	kg CO2	kg CO2	kg CO2	kg CO2	kg CO2	kg CO2	kg CO2	kWh	MMBtu	kWh	kg CO2	kg CO2	kg CO2	kg CO2	kg CO2	kg CO2	kg CO2	kg CO2	kg CO2	kg CO2	kg CO2	kg CO2	kg CO2	kg CO2	kg CO2	kg CO2	kg CO2	kg CO2	kg CO2
	1990	0	0	0	0	0	0	0	0	0	0	0				0	0	0	0	0	0	0	0	0	0	0	0				0	0	0	0	0	0	0	0	0	0	0
	1991	0	0	0	0	0	0	0	0	0	0	0				0	0	0	0	0	0	0	0	0	0	0	0				0	0	0	0	0	0	0	0	0	0	0
	1992	0	0	0	0	0	0	0	0	0	0	0				0	0	0	0	0	0	0	0	0	0	0	0				0	0	0	0	0	0	0	0	0	0	0
	1993	0	0	0	0	0	0	0	0	0	0	0				0	0	0	0	0	0	0	0	0	0	0	0				0	0	0	0	0	0	0	0	0	0	0
	1994	0	0	0	0	0	0	0	0	0	0	0				0	0	0	0	0	0	0	0	0	0	0	0				0	0	0	0	0	0	0	0	0	0	0
	1995	0	0	0	0	0	0	0	0	0	0	0				0	0	0	0	0	0	0	0	0	0	0	0				0	0	0	0	0	0	0	0	0	0	0
	1996	0	0	0	0	0	0	0	0	0	0	0				0	0	0	0	0	0	0	0	0	0	0	0				0	0	0	0	0	0	0	0	0	0	0
	1997	0	0	0	0	0	0	0	0	0	0	0				0	0	0	0	0	0	0	0	0	0	0	0				0	0	0	0	0	0	0	0	0	0	0
	1998	0	0	0	0	0	0	0	0	0	0	0				0	0	0	0	0	0	0	0	0	0	0	0				0	0	0	0	0	0	0	0	0	0	0
	1999	0	0	0	0	0	0	0	0	0	0	0				0	0	0	1.04265e+06	0	0	0	0	0	0	0	0				0	0	0	0	0	0	0	0	0	0	0
	2000	0	0	0	0	0	0	0	0	0	0	0				0	0	0	1.02171e+06	0	0	0	0	0	0	0	0				0	0	0	0	0	0	0	0	0	0	0
	2001	0	0	0	0	0	0	0	0	0	0	0				0	0	0	1.55568e+06	0	0	0	0	0	0	0	0				0	0	0	0	0	0	0	0	0	0	0
	2002	0	0	0	0	0	0	0	0	0	0	0				0	0	0	1.32911e+06	0	0	0	0	0	0	0	0				0	0	0	0	0	0	0	0	0	0	0
	2003	0	0	0	0	0	0	0	0	0	0	0				0	0	0	1.44924e+06	0	0	0	0	0	0	0	0				0	0	0	0	0	0	0	0	0	0	0
	2004	0	0	0	0	0	0	0	0	0	0	0				0	0	0	1.30923e+06	0	0	0	0	0	0	0	0				0	0	0	0	0	0	0	0	0	0	0
	2005	0	0	0	0	0	0	0	0	0	0	0				0	0	0	1.07778e+06	0	0	0	0	0	0	0	0				0	0	0	0	0	0	0	0	0	0	0
	2006	0	0	0	0	0	0	0	0	0	0	0				0	0	0	1.42634e+06	0	0	0	0	0	0	0	0				0	0	0	0	0	0	0	0	0	0	0
	2007	0	0	0	0	0	0	0	0	0	0	0				0	0	0	1.86886e+06	0	0	0	0	0	0	0	0				0	0	0	0	0	0	0	0	0	0	0
	2008	0	0	0	0	0	0	0	0	0	0	0				0	0	0	1.96291e+06	0	0	0	0	0	0	0	0				0	136926	6287.59	0	0	0	0	0	0	48184.6	0
	2009	0	0	0	0	0	0	0	0	0	0	0				0	0	0	0	0	0	0	0	0	0	0	0				0	0	0	0	0	0	0	0	0	0	0
	2010	0	0	0	0	0	0	0	0	0	0	0				0	0	0	0	0	0	0	0	0	0	0	0				0	0	0	0	0	0	0	0	0	0	0
	2011	0	0	0	0	0	0	0	0	0	0	0				0	0	0	0	0	0	0	0	0	0	0	0				0	0	0	0	0	0	0	0	0	0	0
	2012	0	0	0	0	0	0	0	0	0	0	0				0	0	0	0	0	0	0	0	0	0	0	0				0	0	0	0	0	0	0	0	0	0	0
	2013	0	0	0	0	0	0	0	0	0	0	0				0	0	0	2.21693e+06	0	0	0	0	0	0	0	0				0	138690	23314.4	0	0	0	0	0	0	4855.34	0
	2014	0	0	0	0	0	0	0	0	0	0	0				0	0	0	2.26039e+06	0	0	0	0	0	0	0	0				0	139043	26719.7	0	0	0	0	0	0	0	0
	2015	0	0	0	0	0	0	0	0	0	0	0				0	0	0	2.34155e+06	0	0	0	0	0	0	0	0				0	139395	30125.1	0	0	0	0	0	0	0	0
	2016	0	0	0	0	0	0	0	0	0	0	0				0	0	0	2.4227e+06	0	0	0	0	0	0	0	0				0	139748	33530.4	0	0	0	0	0	0	0	0
	2017	0	0	0	0	0	0	0	0	0	0	0				0	0	0	2.50386e+06	0	0	0	0	0	0	0	0				0	140101	36935.8	0	0	0	0	0	0	0	0
	2018	0	0	0	0	0	0	0	0	0	0	0				0	0	0	2.58502e+06	0	0	0	0	0	0	0	0				0	140454	40341.1	0	0	0	0	0	0	0	0
	2019	0	0	0	0	0	0	0	0	0	0	0				0	0	0	2.66617e+06	0	0	0	0	0	0	0	0				0	140807	43746.5	0	0	0	0	0	0	0	0
	2020	0	0	0	0	0	0	0	0	0	0	0				0	0	0	2.74733e+06	0	0	0	0	0	0	0	0				0	141160	47151.8	0	0	0	0	0	0	0	0
	2021	0	0	0	0	0	0	0	0	0	0	0				0	0	0	2.82848e+06	0	0	0	0	0	0	0	0				0	141512	50557.2	0	0	0	0	0	0	0	0
	2022	0	0	0	0	0	0	0	0	0	0	0				0	0	0	2.90964e+06	0	0	0	0	0	0	0	0				0	141865	53962.5	0	0	0	0	0	0	0	0
	2023	0	0	0	0	0	0	0	0	0	0	0				0	0	0	2.9908e+06	0	0	0	0	0	0	0	0				0	142218	57367.9	0	0	0	0	0	0	0	0
	2024	0	0	0	0	0	0	0	0	0	0	0				0	0	0	3.07195e+06	0	0	0	0	0	0	0	0				0	142571	60773.2	0	0	0	0	0	0	0	0
	2025	0	0	0	0	0	0	0	0	0	0	0				0	0	0	3.15311e+06	0	0	0	0	0	0	0	0				0	142924	64178.6	0	0	0	0	0	0	0	0
	2026	0	0	0	0	0	0	0	0	0	0	0				0	0	0	3.23427e+06	0	0	0	0	0	0	0	0				0	143276	67583.9	0	0	0	0	0	0	0	0
	2027	0	0	0	0	0	0	0	0	0	0	0				0	0	0	3.31542e+06	0	0	0	0	0	0	0	0				0	143629	70989.3	0	0	0	0	0	0	0	0
	2028	0	0	0	0	0	0	0	0	0	0	0				0	0	0	3.39658e+06	0	0	0	0	0	0	0	0				0	143982	74394.6	0	0	0	0	0	0	0	0
	2029	0	0	0	0	0	0	0	0	0	0	0				0	0	0	3.47774e+06	0	0	0	0	0	0	0	0				0	144335	77800	0	0	0	0	0	0	0	0
	2030	0	0	0	0	0	0	0	0	0	0	0				0	0	0	3.55889e+06	0	0	0	0	0	0	0	0				0	144688	81205.3	0	0	0	0	0	0	0	0
	2031	0	0	0	0	0	0	0	0	0	0	0				0	0	0	3.64005e+06	0	0	0	0	0	0	0	0				0	145041	84610.7	0	0	0	0	0	0	0	0
	2032	0	0	0	0	0	0	0	0	0	0	0				0	0	0	3.7212e+06	0	0	0	0	0	0	0	0				0	145393	88016	0	0	0	0	0	0	0	0
	2033	0	0	0	0	0	0	0	0	0	0	0				0	0	0	3.80236e+06	0	0	0	0	0	0	0	0				0	145746	91421.4	0	0	0	0	0	0	0	0
	2034	0	0	0	0	0	0	0	0	0	0	0				0	0	0	3.88352e+06	0	0	0	0	0	0	0	0				0	146099	94826.8	0	0	0	0	0	0	0	0
	2035	0	0	0	0	0	0	0	0	0	0	0				0	0	0	3.96467e+06	0	0	0	0	0	0	0	0				0	146452	98232.1	0	0	0	0	0	0	0	0
	2036	0	0	0	0	0	0	0	0	0	0	0				0	0	0	4.04583e+06	0	0	0	0	0	0	0	0				0	146805	101637	0	0	0	0	0	0	0	0
	2037	0	0	0	0	0	0	0	0	0	0	0				0	0	0	4.12699e+06	0	0	0	0	0	0	0	0				0	147157	105043	0	0	0	0	0	0	0	0
	2038	0	0	0	0	0	0	0	0	0	0	0				0	0	0	4.20814e+06	0	0	0	0	0	0	0	0				0	147510	108448	0	0	0	0	0	0	0	0
	2039	0	0	0	0	0	0	0	0	0	0	0				0	0	0	4.2893e+06	0	0	0	0	0	0	0	0				0	147863	111854	0	0	0	0	0	0	0	0
	2040	0	0	0	0	0	0	0	0	0	0	0				0	0	0	4.37045e+06	0	0	0	0	0	0	0	0				0	148216	115259	0	0	0	0	0	0	0	0
	2041	0	0	0	0	0	0	0	0	0	0	0				0	0	0	4.45161e+06	0	0	0	0	0	0	0	0				0	148569	118664	0	0	0	0	0	0	0	0
	2042	0	0	0	0	0	0	0	0	0	0	0				0	0	0	4.53277e+06	0	0	0	0	0	0	0	0				0	148922	122070	0	0	0	0	0	0	0	0
	2043	0	0	0	0	0	0	0	0	0	0	0				0	0	0	4.61392e+06	0	0	0	0	0	0	0	0				0	149274	125475	0	0	0	0	0	0	0	0
	2044	0	0	0	0	0	0	0	0	0	0	0				0	0	0	4.69508e+06	0	0	0	0	0	0	0	0				0	149627	128880	0	0	0	0	0	0	0	0
	2045	0	0	0	0	0	0	0	0	0	0	0				0	0	0	4.77624e+06	0	0	0	0	0	0	0	0				0	149980	132286	0	0	0	0	0	0	0	0
	2046	0	0	0	0	0	0	0	0	0	0	0				0	0	0	4.85739e+06	0	0	0	0	0	0	0	0				0	150333	135691	0	0	0	0	0	0	0	0
	2047	0	0	0	0	0	0	0	0	0	0	0				0	0	0	4.93855e+06	0	0	0	0	0	0	0	0				0	150686	139096	0	0	0	0	0	0	0	0
	2048	0	0	0	0	0	0	0	0	0	0	0				0	0	0	5.0197e+06	0	0	0	0	0	0	0	0				0	151039	142502	0	0	0	0	0	0	0	0
	2049	0	0	0	0	0	0	0	0	0	0	0				0	0	0	5.10086e+06	0	0	0	0	0	0	0	0				0	151391	145907	0	0	0	0	0	0	0	0
	2050	0	0	0	0	0	0	0	0	0	0	0				0	0	0	5.18202e+06	0	0	0	0	0	0	0	0				0	151744	149312	0	0	0	0	0	0	0	0
	2051	0	0	0	0	0	0	0	0	0	0	0				0	0	0	5.26317e+06	0	0	0	0	0	0	0	0				0	152097	152718	0	0	0	0	0	0	0	0
	2052	0	0	0	0	0	0	0	0	0	0	0				0	0	0	5.34433e+06	0	0	0	0	0	0	0	0				0	152450	156123	0	0	0	0	0	0	0	0
	2053	0	0	0	0	0	0	0	0	0	0	0				0	0	0	5.42549e+06	0	0	0	0	0	0	0	0				0	152803	159528	0	0	0	0	0	0	0	0
	2054	0	0	0	0	0	0	0	0	0	0	0				0	0	0	5.50664e+06	0	0	0	0	0	0	0	0				0	153155	162934	0	0	0	0	0	0	0	0
	2055	0	0	0	0	0	0	0	0	0	0	0				0	0	0	5.5878e+06	0	0	0	0	0	0	0	0				0	153508	166339	0	0	0	0	0	0	0	0
	2056	0	0	0	0	0	0	0	0	0	0	0				0	0	0	5.66896e+06	0	0	0	0	0	0	0	0				0	153861	169745	0	0	0	0	0	0	0	0
	2057	0	0	0	0	0	0	0	0	0	0	0				0	0	0	5.75011e+06	0	0	0	0	0	0	0	0				0	154214	173150	0	0	0	0	0	0	0	0
	2058	0	0	0	0	0	0	0	0	0	0	0				0	0	0	5.83127e+06	0	0	0	0	0	0	0	0				0	154567	176555	0	0	0	0	0	0	0	0
	2059	0	0	0	0	0	0	0	0	0	0	0				0	0	0	5.91242e+06	0	0	0	0	0	0	0	0				0	154920	179961	0	0	0	0	0	0	0	0
	2060	0	0	0	0	0	0	0	0	0	0	0				0	0	0	5.99358e+06	0	0	0	0	0	0	0	0				0	155272	183366	0	0	0	0	0	0	0	0
	©2001-2009 Clean Air-Cool Planet, Inc. All rights reserved
[truncated: 58 more columns]

## Sheet: S_CH4
	On this Worksheet: CH4 emissions from all sources. These numbers are the product of the emission factor and the input data. Some sources have no formulas because they have no CO2 emissions, but are included to keep formatting consistent.
	MODULE	Summary
	WORKSHEET	CH4
	UNIVERSITY	St. Edward's University
		--- Scope 1 Emissions Sources ---
		On-Campus Stationary Sources																														Direct Transportation Sources										Refrigerants & Chemicals						Agriculture Sources
	Fiscal Year	On-Campus Cogeneration Plant(s)															Other On-Campus Stationary Sources															University Fleet										Refrigerants & Chemicals						Fertilizer
		Residual Oil (#5-6)	Distillate Oil (#1-4)	Natural Gas	LPG (Propane)	Coal (Steam Coal)	Incinerated Waste	Wood Chips	Wood Pellets	Grass Pellets	Residual BioHeat	Distillate BioHeat	Attributable Solar - Electric	Attributable Solar - Thermal	Attributable Wind	Other	Residual Oil (#5-6)	Distillate Oil (#1-4)	Natural Gas	LPG (Propane)	Coal (Steam Coal)	Incinerated Waste	Wood Chips	Wood Pellets	Grass Pellets	Residual BioHeat	Distillate BioHeat	Attributable Solar - Electric	Attributable Solar - Thermal	Attributable Wind	Other	Gasoline Fleet	Diesel Fleet	Natural Gas Fleet	E85 Fleet	B5 Fleet	B20 Fleet	B100	Hydrogen	Other Fleet Fuel	Electric Fleet	R-11	HFC-134a	HCFC-22	R410a	HG-10	Isceon MO99	Synthetic	Organic
		kg CH4	kg CH4	kg CH4	kg CH4	kg CH4	kg CH4	kg CH4	kg CH4	kg CH4	kg CH4	kg CH4	kWh	MMBtu	kWh	kg CH4	kg CH4	kg CH4	kg CH4	kg CH4	kg CH4	kg CH4	kg CH4	kg CH4	kg CH4	kg CH4	kg CH4	kWh	MMBtu	kWh	kg CH4	kg CH4	kg CH4	kg CH4	kg CH4	kg CH4	kg CH4	kg CH4	kg CH4	kg CH4	kg CH4	kg CH4	kg CH4	kg CH4	kg CH4	kg CH4	kg CH4	kg CH4	kg CH4
	1990	0	0	0	0	0	0	0	0	0	0	0				0	0	0	0	0	0	0	0	0	0	0	0				0	0	0	0	0	0	0	0	0	0	0
	1991	0	0	0	0	0	0	0	0	0	0	0				0	0	0	0	0	0	0	0	0	0	0	0				0	0	0	0	0	0	0	0	0	0	0
	1992	0	0	0	0	0	0	0	0	0	0	0				0	0	0	0	0	0	0	0	0	0	0	0				0	0	0	0	0	0	0	0	0	0	0
	1993	0	0	0	0	0	0	0	0	0	0	0				0	0	0	0	0	0	0	0	0	0	0	0				0	0	0	0	0	0	0	0	0	0	0
	1994	0	0	0	0	0	0	0	0	0	0	0				0	0	0	0	0	0	0	0	0	0	0	0				0	0	0	0	0	0	0	0	0	0	0
	1995	0	0	0	0	0	0	0	0	0	0	0				0	0	0	0	0	0	0	0	0	0	0	0				0	0	0	0	0	0	0	0	0	0	0
	1996	0	0	0	0	0	0	0	0	0	0	0				0	0	0	0	0	0	0	0	0	0	0	0				0	0	0	0	0	0	0	0	0	0	0
	1997	0	0	0	0	0	0	0	0	0	0	0				0	0	0	0	0	0	0	0	0	0	0	0				0	0	0	0	0	0	0	0	0	0	0
	1998	0	0	0	0	0	0	0	0	0	0	0				0	0	0	0	0	0	0	0	0	0	0	0				0	0	0	0	0	0	0	0	0	0	0
	1999	0	0	0	0	0	0	0	0	0	0	0				0	0	0	103.734	0	0	0	0	0	0	0	0				0	0	0	0	0	0	0	0	0	0	0
	2000	0	0	0	0	0	0	0	0	0	0	0				0	0	0	101.58	0	0	0	0	0	0	0	0				0	0	0	0	0	0	0	0	0	0	0
	2001	0	0	0	0	0	0	0	0	0	0	0				0	0	0	154.775	0	0	0	0	0	0	0	0				0	0	0	0	0	0	0	0	0	0	0
	2002	0	0	0	0	0	0	0	0	0	0	0				0	0	0	132.234	0	0	0	0	0	0	0	0				0	0	0	0	0	0	0	0	0	0	0
	2003	0	0	0	0	0	0	0	0	0	0	0				0	0	0	144.386	0	0	0	0	0	0	0	0				0	0	0	0	0	0	0	0	0	0	0
	2004	0	0	0	0	0	0	0	0	0	0	0				0	0	0	130.256	0	0	0	0	0	0	0	0				0	0	0	0	0	0	0	0	0	0	0
	2005	0	0	0	0	0	0	0	0	0	0	0				0	0	0	107.229	0	0	0	0	0	0	0	0				0	0	0	0	0	0	0	0	0	0	0
	2006	0	0	0	0	0	0	0	0	0	0	0				0	0	0	141.908	0	0	0	0	0	0	0	0				0	0	0	0	0	0	0	0	0	0	0
	2007	0	0	0	0	0	0	0	0	0	0	0				0	0	0	185.935	0	0	0	0	0	0	0	0				0	0	0	0	0	0	0	0	0	0	0
	2008	0	0	0	0	0	0	0	0	0	0	0				0	0	0	195.291	0	0	0	0	0	0	0	0				0	28.8077	0.347571	0	0	0	0	0	0	0.2352	0
	2009	0	0	0	0	0	0	0	0	0	0	0				0	0	0	0	0	0	0	0	0	0	0	0				0	0	0	0	0	0	0	0	0	0	0
	2010	0	0	0	0	0	0	0	0	0	0	0				0	0	0	0	0	0	0	0	0	0	0	0				0	0	0	0	0	0	0	0	0	0	0
	2011	0	0	0	0	0	0	0	0	0	0	0				0	0	0	0	0	0	0	0	0	0	0	0				0	0	0	0	0	0	0	0	0	0	0
	2012	0	0	0	0	0	0	0	0	0	0	0				0	0	0	0	0	0	0	0	0	0	0	0				0	0	0	0	0	0	0	0	0	0	0
	2013	0	0	0	0	0	0	0	0	0	0	0				0	0	0	220.564	0	0	0	0	0	0	0	0				0	29.1752	1.28879	0	0	0	0	0	0	0.0237	0
	2014	0	0	0	0	0	0	0	0	0	0	0				0	0	0	224.888	0	0	0	0	0	0	0	0				0	29.2494	1.47704	0	0	0	0	0	0	0	0
	2015	0	0	0	0	0	0	0	0	0	0	0				0	0	0	232.962	0	0	0	0	0	0	0	0				0	29.3237	1.66528	0	0	0	0	0	0	0	0
	2016	0	0	0	0	0	0	0	0	0	0	0				0	0	0	241.037	0	0	0	0	0	0	0	0				0	29.3979	1.85352	0	0	0	0	0	0	0	0
	2017	0	0	0	0	0	0	0	0	0	0	0				0	0	0	249.111	0	0	0	0	0	0	0	0				0	29.4721	2.04177	0	0	0	0	0	0	0	0
	2018	0	0	0	0	0	0	0	0	0	0	0				0	0	0	257.185	0	0	0	0	0	0	0	0				0	29.5463	2.23001	0	0	0	0	0	0	0	0
	2019	0	0	0	0	0	0	0	0	0	0	0				0	0	0	265.26	0	0	0	0	0	0	0	0				0	29.6205	2.41826	0	0	0	0	0	0	0	0
	2020	0	0	0	0	0	0	0	0	0	0	0				0	0	0	273.334	0	0	0	0	0	0	0	0				0	29.6948	2.6065	0	0	0	0	0	0	0	0
	2021	0	0	0	0	0	0	0	0	0	0	0				0	0	0	281.408	0	0	0	0	0	0	0	0				0	29.769	2.79474	0	0	0	0	0	0	0	0
	2022	0	0	0	0	0	0	0	0	0	0	0				0	0	0	289.482	0	0	0	0	0	0	0	0				0	29.8432	2.98299	0	0	0	0	0	0	0	0
	2023	0	0	0	0	0	0	0	0	0	0	0				0	0	0	297.557	0	0	0	0	0	0	0	0				0	29.9174	3.17123	0	0	0	0	0	0	0	0
	2024	0	0	0	0	0	0	0	0	0	0	0				0	0	0	305.631	0	0	0	0	0	0	0	0				0	29.9916	3.35948	0	0	0	0	0	0	0	0
	2025	0	0	0	0	0	0	0	0	0	0	0				0	0	0	313.705	0	0	0	0	0	0	0	0				0	30.0659	3.54772	0	0	0	0	0	0	0	0
	2026	0	0	0	0	0	0	0	0	0	0	0				0	0	0	321.78	0	0	0	0	0	0	0	0				0	30.1401	3.73596	0	0	0	0	0	0	0	0
	2027	0	0	0	0	0	0	0	0	0	0	0				0	0	0	329.854	0	0	0	0	0	0	0	0				0	30.2143	3.92421	0	0	0	0	0	0	0	0
	2028	0	0	0	0	0	0	0	0	0	0	0				0	0	0	337.928	0	0	0	0	0	0	0	0				0	30.2885	4.11245	0	0	0	0	0	0	0	0
	2029	0	0	0	0	0	0	0	0	0	0	0				0	0	0	346.003	0	0	0	0	0	0	0	0				0	30.3627	4.3007	0	0	0	0	0	0	0	0
	2030	0	0	0	0	0	0	0	0	0	0	0				0	0	0	354.077	0	0	0	0	0	0	0	0				0	30.437	4.48894	0	0	0	0	0	0	0	0
	2031	0	0	0	0	0	0	0	0	0	0	0				0	0	0	362.151	0	0	0	0	0	0	0	0				0	30.5112	4.67718	0	0	0	0	0	0	0	0
	2032	0	0	0	0	0	0	0	0	0	0	0				0	0	0	370.225	0	0	0	0	0	0	0	0				0	30.5854	4.86543	0	0	0	0	0	0	0	0
	2033	0	0	0	0	0	0	0	0	0	0	0				0	0	0	378.3	0	0	0	0	0	0	0	0				0	30.6596	5.05367	0	0	0	0	0	0	0	0
	2034	0	0	0	0	0	0	0	0	0	0	0				0	0	0	386.374	0	0	0	0	0	0	0	0				0	30.7338	5.24192	0	0	0	0	0	0	0	0
	2035	0	0	0	0	0	0	0	0	0	0	0				0	0	0	394.448	0	0	0	0	0	0	0	0				0	30.8081	5.43016	0	0	0	0	0	0	0	0
	2036	0	0	0	0	0	0	0	0	0	0	0				0	0	0	402.523	0	0	0	0	0	0	0	0				0	30.8823	5.6184	0	0	0	0	0	0	0	0
	2037	0	0	0	0	0	0	0	0	0	0	0				0	0	0	410.597	0	0	0	0	0	0	0	0				0	30.9565	5.80665	0	0	0	0	0	0	0	0
	2038	0	0	0	0	0	0	0	0	0	0	0				0	0	0	418.671	0	0	0	0	0	0	0	0				0	31.0307	5.99489	0	0	0	0	0	0	0	0
	2039	0	0	0	0	0	0	0	0	0	0	0				0	0	0	426.746	0	0	0	0	0	0	0	0				0	31.1049	6.18314	0	0	0	0	0	0	0	0
	2040	0	0	0	0	0	0	0	0	0	0	0				0	0	0	434.82	0	0	0	0	0	0	0	0				0	31.1792	6.37138	0	0	0	0	0	0	0	0
	2041	0	0	0	0	0	0	0	0	0	0	0				0	0	0	442.894	0	0	0	0	0	0	0	0				0	31.2534	6.55962	0	0	0	0	0	0	0	0
	2042	0	0	0	0	0	0	0	0	0	0	0				0	0	0	450.968	0	0	0	0	0	0	0	0				0	31.3276	6.74787	0	0	0	0	0	0	0	0
	2043	0	0	0	0	0	0	0	0	0	0	0				0	0	0	459.043	0	0	0	0	0	0	0	0				0	31.4018	6.93611	0	0	0	0	0	0	0	0
	2044	0	0	0	0	0	0	0	0	0	0	0				0	0	0	467.117	0	0	0	0	0	0	0	0				0	31.476	7.12436	0	0	0	0	0	0	0	0
	2045	0	0	0	0	0	0	0	0	0	0	0				0	0	0	475.191	0	0	0	0	0	0	0	0				0	31.5503	7.3126	0	0	0	0	0	0	0	0
	2046	0	0	0	0	0	0	0	0	0	0	0				0	0	0	483.266	0	0	0	0	0	0	0	0				0	31.6245	7.50084	0	0	0	0	0	0	0	0
	2047	0	0	0	0	0	0	0	0	0	0	0				0	0	0	491.34	0	0	0	0	0	0	0	0				0	31.6987	7.68909	0	0	0	0	0	0	0	0
	2048	0	0	0	0	0	0	0	0	0	0	0				0	0	0	499.414	0	0	0	0	0	0	0	0				0	31.7729	7.87733	0	0	0	0	0	0	0	0
	2049	0	0	0	0	0	0	0	0	0	0	0				0	0	0	507.489	0	0	0	0	0	0	0	0				0	31.8471	8.06558	0	0	0	0	0	0	0	0
	2050	0	0	0	0	0	0	0	0	0	0	0				0	0	0	515.563	0	0	0	0	0	0	0	0				0	31.9214	8.25382	0	0	0	0	0	0	0	0
	2051	0	0	0	0	0	0	0	0	0	0	0				0	0	0	523.637	0	0	0	0	0	0	0	0				0	31.9956	8.44206	0	0	0	0	0	0	0	0
	2052	0	0	0	0	0	0	0	0	0	0	0				0	0	0	531.711	0	0	0	0	0	0	0	0				0	32.0698	8.63031	0	0	0	0	0	0	0	0
	2053	0	0	0	0	0	0	0	0	0	0	0				0	0	0	539.786	0	0	0	0	0	0	0	0				0	32.144	8.81855	0	0	0	0	0	0	0	0
	2054	0	0	0	0	0	0	0	0	0	0	0				0	0	0	547.86	0	0	0	0	0	0	0	0				0	32.2182	9.0068	0	0	0	0	0	0	0	0
	2055	0	0	0	0	0	0	0	0	0	0	0				0	0	0	555.934	0	0	0	0	0	0	0	0				0	32.2925	9.19504	0	0	0	0	0	0	0	0
	2056	0	0	0	0	0	0	0	0	0	0	0				0	0	0	564.009	0	0	0	0	0	0	0	0				0	32.3667	9.38328	0	0	0	0	0	0	0	0
	2057	0	0	0	0	0	0	0	0	0	0	0				0	0	0	572.083	0	0	0	0	0	0	0	0				0	32.4409	9.57153	0	0	0	0	0	0	0	0
	2058	0	0	0	0	0	0	0	0	0	0	0				0	0	0	580.157	0	0	0	0	0	0	0	0				0	32.5151	9.75977	0	0	0	0	0	0	0	0
	2059	0	0	0	0	0	0	0	0	0	0	0				0	0	0	588.232	0	0	0	0	0	0	0	0				0	32.5893	9.94801	0	0	0	0	0	0	0	0
	2060	0	0	0	0	0	0	0	0	0	0	0				0	0	0	596.306	0	0	0	0	0	0	0	0				0	32.6636	10.1363	0	0	0	0	0	0	0	0
	©2001-2009 Clean Air-Cool Planet, Inc. All rights reserved
[truncated: 58 more columns]

## Sheet: S_N2O
	On this Worksheet: N2O emissions from all sources. These numbers are the product of the emission factor and the input data. Some sources have no formulas because they have no CO2 emissions, but are included to keep formatting consistent.
	MODULE	Summary
	WORKSHEET	N2O
	UNIVERSITY	St. Edward's University
		--- Scope 1 Emissions Sources ---
		On-Campus Stationary Sources																														Direct Transportation Sources										Refrigerants & Chemicals						Agriculture Sources
	Fiscal Year	On-Campus Cogeneration Plant(s)															Other On-Campus Stationary Sources															University Fleet										Refrigerants & Chemicals						Fertilizer
		Residual Oil (#5-6)	Distillate Oil (#1-4)	Natural Gas	LPG (Propane)	Coal (Steam Coal)	Incinerated Waste	Wood Chips	Wood Pellets	Grass Pellets	Residual BioHeat	Distillate BioHeat	Attributable Solar - Electric	Attributable Solar - Thermal	Attributable Wind	Other	Residual Oil (#5-6)	Distillate Oil (#1-4)	Natural Gas	LPG (Propane)	Coal (Steam Coal)	Incinerated Waste	Wood Chips	Wood Pellets	Grass Pellets	Residual BioHeat	Distillate BioHeat	Attributable Solar - Electric	Attributable Solar - Thermal	Attributable Wind	Other	Gasoline Fleet	Diesel Fleet	Natural Gas Fleet	E85 Fleet	B5 Fleet	B20 Fleet	B100	Hydrogen	Other Fleet Fuel	Electric Fleet	R-11	HFC-134a	HCFC-22	R410a	HG-10	Isceon MO99	Synthetic	Organic
		kg N2O	kg N2O	kg N2O	kg N2O	kg N2O	kg N2O	kg N2O	kg N2O	kg N2O	kg N2O	kg N2O	kWh	MMBtu	kWh	kg N2O	kg N2O	kg N2O	kg N2O	kg N2O	kg N2O	kg N2O	kg N2O	kg N2O	kg N2O	kg N2O	kg N2O	kWh	MMBtu	kWh	kg N2O	kg N2O	kg N2O	kg N2O	kg N2O	kg N2O	kg N2O	kg N2O	kg N2O	kg N2O	kg N2O	kg N2O	kg N2O	kg N2O	kg N2O	kg N2O	kg N2O	kg N2O	kg N2O
	1990	0	0	0	0	0	0	0	0	0	0	0				0	0	0	0	0	0	0	0	0	0	0	0				0	0	0	0	0	0	0	0	0	0	0							0	0
	1991	0	0	0	0	0	0	0	0	0	0	0				0	0	0	0	0	0	0	0	0	0	0	0				0	0	0	0	0	0	0	0	0	0	0							0	0
	1992	0	0	0	0	0	0	0	0	0	0	0				0	0	0	0	0	0	0	0	0	0	0	0				0	0	0	0	0	0	0	0	0	0	0							0	0
	1993	0	0	0	0	0	0	0	0	0	0	0				0	0	0	0	0	0	0	0	0	0	0	0				0	0	0	0	0	0	0	0	0	0	0							0	0
	1994	0	0	0	0	0	0	0	0	0	0	0				0	0	0	0	0	0	0	0	0	0	0	0				0	0	0	0	0	0	0	0	0	0	0							0	0
	1995	0	0	0	0	0	0	0	0	0	0	0				0	0	0	0	0	0	0	0	0	0	0	0				0	0	0	0	0	0	0	0	0	0	0							0	0
	1996	0	0	0	0	0	0	0	0	0	0	0				0	0	0	0	0	0	0	0	0	0	0	0				0	0	0	0	0	0	0	0	0	0	0							0	0
	1997	0	0	0	0	0	0	0	0	0	0	0				0	0	0	0	0	0	0	0	0	0	0	0				0	0	0	0	0	0	0	0	0	0	0							0	0
	1998	0	0	0	0	0	0	0	0	0	0	0				0	0	0	0	0	0	0	0	0	0	0	0				0	0	0	0	0	0	0	0	0	0	0							0	0
	1999	0	0	0	0	0	0	0	0	0	0	0				0	0	0	2.07469	0	0	0	0	0	0	0	0				0	0	0	0	0	0	0	0	0	0	0							0	0
	2000	0	0	0	0	0	0	0	0	0	0	0				0	0	0	2.0316	0	0	0	0	0	0	0	0				0	0	0	0	0	0	0	0	0	0	0							0	0
	2001	0	0	0	0	0	0	0	0	0	0	0				0	0	0	3.09551	0	0	0	0	0	0	0	0				0	0	0	0	0	0	0	0	0	0	0							0	0
	2002	0	0	0	0	0	0	0	0	0	0	0				0	0	0	2.64467	0	0	0	0	0	0	0	0				0	0	0	0	0	0	0	0	0	0	0							0	0
	2003	0	0	0	0	0	0	0	0	0	0	0				0	0	0	2.88771	0	0	0	0	0	0	0	0				0	0	0	0	0	0	0	0	0	0	0							0	0
	2004	0	0	0	0	0	0	0	0	0	0	0				0	0	0	2.60512	0	0	0	0	0	0	0	0				0	0	0	0	0	0	0	0	0	0	0							0	0
	2005	0	0	0	0	0	0	0	0	0	0	0				0	0	0	2.14458	0	0	0	0	0	0	0	0				0	0	0	0	0	0	0	0	0	0	0							0	0
	2006	0	0	0	0	0	0	0	0	0	0	0				0	0	0	2.83816	0	0	0	0	0	0	0	0				0	0	0	0	0	0	0	0	0	0	0							0	0
	2007	0	0	0	0	0	0	0	0	0	0	0				0	0	0	3.7187	0	0	0	0	0	0	0	0				0	0	0	0	0	0	0	0	0	0	0							0	0
	2008	0	0	0	0	0	0	0	0	0	0	0				0	0	0	3.90582	0	0	0	0	0	0	0	0				0	9.6333	0.157541	0	0	0	0	0	0	0.04704	0							0	0
	2009	0	0	0	0	0	0	0	0	0	0	0				0	0	0	0	0	0	0	0	0	0	0	0				0	0	0	0	0	0	0	0	0	0	0							0	0
	2010	0	0	0	0	0	0	0	0	0	0	0				0	0	0	0	0	0	0	0	0	0	0	0				0	0	0	0	0	0	0	0	0	0	0							0	0
	2011	0	0	0	0	0	0	0	0	0	0	0				0	0	0	0	0	0	0	0	0	0	0	0				0	0	0	0	0	0	0	0	0	0	0							0	0
	2012	0	0	0	0	0	0	0	0	0	0	0				0	0	0	0	0	0	0	0	0	0	0	0				0	0	0	0	0	0	0	0	0	0	0							0	0
	2013	0	0	0	0	0	0	0	0	0	0	0				0	0	0	4.41127	0	0	0	0	0	0	0	0				0	9.7567	0.584161	0	0	0	0	0	0	0.00474	0							8.55754	13.5076
	2014	0	0	0	0	0	0	0	0	0	0	0				0	0	0	4.49776	0	0	0	0	0	0	0	0				0	9.78152	0.669485	0	0	0	0	0	0	0	0							8.55754	13.5076
	2015	0	0	0	0	0	0	0	0	0	0	0				0	0	0	4.65925	0	0	0	0	0	0	0	0				0	9.80634	0.754809	0	0	0	0	0	0	0	0							8.55754	13.5076
	2016	0	0	0	0	0	0	0	0	0	0	0				0	0	0	4.82073	0	0	0	0	0	0	0	0				0	9.83116	0.840133	0	0	0	0	0	0	0	0							8.55754	13.5076
	2017	0	0	0	0	0	0	0	0	0	0	0				0	0	0	4.98222	0	0	0	0	0	0	0	0				0	9.85598	0.925457	0	0	0	0	0	0	0	0							8.55754	13.5076
	2018	0	0	0	0	0	0	0	0	0	0	0				0	0	0	5.1437	0	0	0	0	0	0	0	0				0	9.8808	1.01078	0	0	0	0	0	0	0	0							8.55754	13.5076
	2019	0	0	0	0	0	0	0	0	0	0	0				0	0	0	5.30519	0	0	0	0	0	0	0	0				0	9.90562	1.09611	0	0	0	0	0	0	0	0							8.55754	13.5076
	2020	0	0	0	0	0	0	0	0	0	0	0				0	0	0	5.46668	0	0	0	0	0	0	0	0				0	9.93044	1.18143	0	0	0	0	0	0	0	0							8.55754	13.5076
	2021	0	0	0	0	0	0	0	0	0	0	0				0	0	0	5.62816	0	0	0	0	0	0	0	0				0	9.95526	1.26675	0	0	0	0	0	0	0	0							8.55754	13.5076
	2022	0	0	0	0	0	0	0	0	0	0	0				0	0	0	5.78965	0	0	0	0	0	0	0	0				0	9.98008	1.35208	0	0	0	0	0	0	0	0							8.55754	13.5076
	2023	0	0	0	0	0	0	0	0	0	0	0				0	0	0	5.95113	0	0	0	0	0	0	0	0				0	10.0049	1.4374	0	0	0	0	0	0	0	0							8.55754	13.5076
	2024	0	0	0	0	0	0	0	0	0	0	0				0	0	0	6.11262	0	0	0	0	0	0	0	0				0	10.0297	1.52273	0	0	0	0	0	0	0	0							8.55754	13.5076
	2025	0	0	0	0	0	0	0	0	0	0	0				0	0	0	6.27411	0	0	0	0	0	0	0	0				0	10.0545	1.60805	0	0	0	0	0	0	0	0							8.55754	13.5076
	2026	0	0	0	0	0	0	0	0	0	0	0				0	0	0	6.43559	0	0	0	0	0	0	0	0				0	10.0794	1.69337	0	0	0	0	0	0	0	0							8.55754	13.5076
	2027	0	0	0	0	0	0	0	0	0	0	0				0	0	0	6.59708	0	0	0	0	0	0	0	0				0	10.1042	1.7787	0	0	0	0	0	0	0	0							8.55754	13.5076
	2028	0	0	0	0	0	0	0	0	0	0	0				0	0	0	6.75856	0	0	0	0	0	0	0	0				0	10.129	1.86402	0	0	0	0	0	0	0	0							8.55754	13.5076
	2029	0	0	0	0	0	0	0	0	0	0	0				0	0	0	6.92005	0	0	0	0	0	0	0	0				0	10.1538	1.94935	0	0	0	0	0	0	0	0							8.55754	13.5076
	2030	0	0	0	0	0	0	0	0	0	0	0				0	0	0	7.08154	0	0	0	0	0	0	0	0				0	10.1786	2.03467	0	0	0	0	0	0	0	0							8.55754	13.5076
	2031	0	0	0	0	0	0	0	0	0	0	0				0	0	0	7.24302	0	0	0	0	0	0	0	0				0	10.2035	2.11999	0	0	0	0	0	0	0	0							8.55754	13.5076
	2032	0	0	0	0	0	0	0	0	0	0	0				0	0	0	7.40451	0	0	0	0	0	0	0	0				0	10.2283	2.20532	0	0	0	0	0	0	0	0							8.55754	13.5076
	2033	0	0	0	0	0	0	0	0	0	0	0				0	0	0	7.56599	0	0	0	0	0	0	0	0				0	10.2531	2.29064	0	0	0	0	0	0	0	0							8.55754	13.5076
	2034	0	0	0	0	0	0	0	0	0	0	0				0	0	0	7.72748	0	0	0	0	0	0	0	0				0	10.2779	2.37597	0	0	0	0	0	0	0	0							8.55754	13.5076
	2035	0	0	0	0	0	0	0	0	0	0	0				0	0	0	7.88897	0	0	0	0	0	0	0	0				0	10.3027	2.46129	0	0	0	0	0	0	0	0							8.55754	13.5076
	2036	0	0	0	0	0	0	0	0	0	0	0				0	0	0	8.05045	0	0	0	0	0	0	0	0				0	10.3276	2.54661	0	0	0	0	0	0	0	0							8.55754	13.5076
	2037	0	0	0	0	0	0	0	0	0	0	0				0	0	0	8.21194	0	0	0	0	0	0	0	0				0	10.3524	2.63194	0	0	0	0	0	0	0	0							8.55754	13.5076
	2038	0	0	0	0	0	0	0	0	0	0	0				0	0	0	8.37342	0	0	0	0	0	0	0	0				0	10.3772	2.71726	0	0	0	0	0	0	0	0							8.55754	13.5076
	2039	0	0	0	0	0	0	0	0	0	0	0				0	0	0	8.53491	0	0	0	0	0	0	0	0				0	10.402	2.80259	0	0	0	0	0	0	0	0							8.55754	13.5076
	2040	0	0	0	0	0	0	0	0	0	0	0				0	0	0	8.6964	0	0	0	0	0	0	0	0				0	10.4269	2.88791	0	0	0	0	0	0	0	0							8.55754	13.5076
	2041	0	0	0	0	0	0	0	0	0	0	0				0	0	0	8.85788	0	0	0	0	0	0	0	0				0	10.4517	2.97323	0	0	0	0	0	0	0	0							8.55754	13.5076
	2042	0	0	0	0	0	0	0	0	0	0	0				0	0	0	9.01937	0	0	0	0	0	0	0	0				0	10.4765	3.05856	0	0	0	0	0	0	0	0							8.55754	13.5076
	2043	0	0	0	0	0	0	0	0	0	0	0				0	0	0	9.18085	0	0	0	0	0	0	0	0				0	10.5013	3.14388	0	0	0	0	0	0	0	0							8.55754	13.5076
	2044	0	0	0	0	0	0	0	0	0	0	0				0	0	0	9.34234	0	0	0	0	0	0	0	0				0	10.5261	3.22921	0	0	0	0	0	0	0	0							8.55754	13.5076
	2045	0	0	0	0	0	0	0	0	0	0	0				0	0	0	9.50383	0	0	0	0	0	0	0	0				0	10.551	3.31453	0	0	0	0	0	0	0	0							8.55754	13.5076
	2046	0	0	0	0	0	0	0	0	0	0	0				0	0	0	9.66531	0	0	0	0	0	0	0	0				0	10.5758	3.39985	0	0	0	0	0	0	0	0							8.55754	13.5076
	2047	0	0	0	0	0	0	0	0	0	0	0				0	0	0	9.8268	0	0	0	0	0	0	0	0				0	10.6006	3.48518	0	0	0	0	0	0	0	0							8.55754	13.5076
	2048	0	0	0	0	0	0	0	0	0	0	0				0	0	0	9.98828	0	0	0	0	0	0	0	0				0	10.6254	3.5705	0	0	0	0	0	0	0	0							8.55754	13.5076
	2049	0	0	0	0	0	0	0	0	0	0	0				0	0	0	10.1498	0	0	0	0	0	0	0	0				0	10.6502	3.65583	0	0	0	0	0	0	0	0							8.55754	13.5076
	2050	0	0	0	0	0	0	0	0	0	0	0				0	0	0	10.3113	0	0	0	0	0	0	0	0				0	10.6751	3.74115	0	0	0	0	0	0	0	0							8.55754	13.5076
	2051	0	0	0	0	0	0	0	0	0	0	0				0	0	0	10.4727	0	0	0	0	0	0	0	0				0	10.6999	3.82647	0	0	0	0	0	0	0	0							8.55754	13.5076
	2052	0	0	0	0	0	0	0	0	0	0	0				0	0	0	10.6342	0	0	0	0	0	0	0	0				0	10.7247	3.9118	0	0	0	0	0	0	0	0							8.55754	13.5076
	2053	0	0	0	0	0	0	0	0	0	0	0				0	0	0	10.7957	0	0	0	0	0	0	0	0				0	10.7495	3.99712	0	0	0	0	0	0	0	0							8.55754	13.5076
	2054	0	0	0	0	0	0	0	0	0	0	0				0	0	0	10.9572	0	0	0	0	0	0	0	0				0	10.7743	4.08244	0	0	0	0	0	0	0	0							8.55754	13.5076
	2055	0	0	0	0	0	0	0	0	0	0	0				0	0	0	11.1187	0	0	0	0	0	0	0	0				0	10.7992	4.16777	0	0	0	0	0	0	0	0							8.55754	13.5076
	2056	0	0	0	0	0	0	0	0	0	0	0				0	0	0	11.2802	0	0	0	0	0	0	0	0				0	10.824	4.25309	0	0	0	0	0	0	0	0							8.55754	13.5076
	2057	0	0	0	0	0	0	0	0	0	0	0				0	0	0	11.4417	0	0	0	0	0	0	0	0				0	10.8488	4.33842	0	0	0	0	0	0	0	0							8.55754	13.5076
	2058	0	0	0	0	0	0	0	0	0	0	0				0	0	0	11.6031	0	0	0	0	0	0	0	0				0	10.8736	4.42374	0	0	0	0	0	0	0	0							8.55754	13.5076
	2059	0	0	0	0	0	0	0	0	0	0	0				0	0	0	11.7646	0	0	0	0	0	0	0	0				0	10.8984	4.50907	0	0	0	0	0	0	0	0							8.55754	13.5076
	2060	0	0	0	0	0	0	0	0	0	0	0				0	0	0	11.9261	0	0	0	0	0	0	0	0				0	10.9233	4.59439	0	0	0	0	0	0	0	0							8.55754	13.5076
	©2001-2009 Clean Air-Cool Planet, Inc. All rights reserved
[truncated: 58 more columns]

[truncated: 96 more sheets: S_Energy, S_CO2_Sum, S_CH4_Sum, S_N2O_Sum, S_Energy_Sum, S_eCO2_Sum, S_Annual, S_Demo, ACUPCC_Reporting, GraphControl, Linear Projection, Normalization, Customized trends, Detailed Projection, Project_Input, P_Cost_Ass, Project_EF, P_Emissions_Calc, P_Source_Increases, P_Source_Reductions …]
