# Supplementary material
Source: MDPI journal article supplement (https://www.mdpi.com/2071-1050/8/1/80)
Supplement: s1 [file s1 › CACP Excel template - Austin College.xlsm]

## Sheet: User_Agreement
	v6.9
	©2001-2010 Clean Air-Cool Planet, Inc. All rights reserved
	Clean Air-Cool Planet, Campus Carbon Calculator, and the Clean Air-Cool Planet logo are trademarks of Clean Air-Cool Planet, Inc.
	USERS' AGREEMENT
	By using Clean Air-Cool Planet’s Campus Carbon Calculator, you are agreeing to specific terms and conditions:
	1. The Campus Carbon Calculator is designed to help campus staff, faculty, students and administrators document, understand, project, and reduce the campus greenhouse gas footprint. The Calculator can help a campus in taking the first steps toward a comprehensive Climate Action or Climate Neutrality Plan. Organizations or entities wishing to use the Calculator for other purposes should contact CA…
	2. When presenting the results of your campus greenhouse gas inventory, whether in written reports or spoken presentations, please credit the “Clean Air-Cool Planet Campus Carbon Calculator” as a tool you used to complete this task.
	3. Many campuses want to share the results of the inventory with their constituents and the general public once they’ve completed it. Whether or not you are making your inventory public, download and use of the Calculator implies willingness to share results of the inventory with CA-CP, only for purposes of aggregating U.S. campus inventory results. Results are expected to be shared upon completi…
	4. CA-CP will not be responsible for verifying your results from the Campus Carbon Calculator, and assumes no liability for your inventory results, or their use on your campus.
	I UNDERSTAND AND AM WILLING TO ABIDE BY THESE TERMS. I WISH TO PROCEED.
	Originally developed by Adam Wilson as a collaborative project between the University of New Hampshire's Office of Sustainability and Clean Air-Cool Planet in 2001. Version 4.0 was updated to version 5.0 by Jordan Macy and Jennifer Schroeder in '05-'06. Version 5.0 was updated to version 6.0 by Claire Roby, Ian Hough, Jason Kowalski, Lisa Weil, Tai Young Taft, and Jennifer (Schroeder) Andrews in …
	Acknowledgments:
	CA-CP would first like to extend gratitude and acknowledgement to one of our first, and best, partners - the University of New Hampshire. Their integral role in the creation of this tool is a great example of the power schools have to help accelerate the pace of change by solving problems on their own campuses while being mindful of the potential for creating models to light the way for others. T…
	The planning elements of the tool were inspired by the good work of students at Middlebury College (MiddShift), University of California Santa Barbara (NAELS Climate Neutral project), and the efforts of Duke University as presented by then-Sustainability Coordinator Sam Hummel in his "Charting a Path to Greenhouse Gas Reductions" paper at the Ball State Greening of the Campus conference in 2005. …
	CA-CP would also like to extend sincere thanks for the invaluable review, assistance and/or collaboration offered over the years by the following individuals and organizations: Julian Dautremont-Smith of the Association for the Advancement of Sustainability in Higher Education (AASHE); the team over at the World Resources Institute, including Jennifer Layke, Samantha Putt del Pino, Ryan Levinson …

## Sheet: Introduction
©2001-2012 Clean Air-Cool Planet, Inc. All Rights Reserved
	Clean Air-Cool Planet, Campus Carbon Calculator, and the Clean Air-Cool Planet logo are trademarks of Clean Air-Cool Planet, Inc.
					www.cleanair-coolplanet.org
					University	Austin College
					Contact Name	Thomas LaPoint		Note: v6.85 can automatically transfer your data from previous v6 files. Scroll down for instructions
					Title
					Organization
					State
					Phone
					Fax
					E-Mail
					Getting Started
					Navigating the Calculator
					Background Information
					Color Coding
					Using the Calculator
					Updating from Previous Calculator Files
												Use these buttons if your old file has an .xls file extension (older version of Excel)
												Use these buttons if your old file has an .xlsx file extension (newer version of Excel)
												Use these buttons if your old file has an .xls file extension (older version of Excel)
												Use these buttons if your old file has an .xlsx file extension (newer version of Excel)

## Sheet: Spreadsheet_Map
©2001-2012 Clean Air-Cool Planet, Inc. All rights reserved.
Clean Air-Cool Planet, Campus Carbon Calculator, and the Clean Air-Cool Planet logo are trademarks of Clean Air-Cool Planet, Inc.
				INPUTS			EMISSIONS FACTORS					CALCULATIONS						RESULTS					GRAPHS
	REFERENCE MODULE

## Sheet: Input
		On this Worksheet: Enter data related to emissions. If a column does not apply or the data is unavailable, leave it blank.
		MODULE	Input
		WORKSHEET	Input: Enter emissions source activity and institutional data
		UNIVERSITY	Austin College
													--- Scope 1 Emissions Sources ---
			Institutional Data										On-Campus Stationary Sources																																		Direct Transportation Sources
		Fiscal Year	Budget - Click here to enter data			Population					Physical Size		On-Campus Cogeneration Plant(s)																			Other On-Campus Stationary Sources															University Fleet
			Operating Budget	Research Budget	Energy Budget	Full Time Students	Part-Time Students	Summer School Students	Faculty	Staff	Total Building Space	Total Research Building Space	Residual Oil (#5-6)	Distillate Oil (#1-4)	Natural Gas	LPG (Propane)	Coal (Steam Coal)	Incinerated Waste	Wood Chips	Wood Pellets	Grass Pellets	Residual BioHeat	Distillate BioHeat	Attributable Solar - Electric	Attributable Solar - Thermal	Attributable Wind	Other	Electric Output	Steam Output	Electric Efficiency	Steam Efficiency	Residual Oil (#5-6)	Distillate Oil (#1-4)	Natural Gas	LPG (Propane)	Coal (Steam Coal)	Incinerated Waste	Wood Chips	Wood Pellets	Grass Pellets	Residual BioHeat	Distillate BioHeat	Attributable Solar - Electric	Attributable Solar - Thermal	Attributable Wind	Other	Gasoline Fleet	Diesel Fleet	Natural Gas Fleet
			$ (2005)	$ (2005)	$ (2005)	#	#	#	#	#	Square feet	Square feet	Gallons	Gallons	MMBtu	Gallons	Short Tons	Short Tons	Short Tons	Short Tons	Short Tons	Gallons	Gallons	kWh	MMBtu	kWh	MMBtu	kWh	MMBtu	%	%	Gallons	Gallons	MMBtu	Gallons	Short Tons	Short Tons	Short Tons	Short Tons	Short Tons	Gallons	Gallons	kWh	MMBtu	kWh	MMBtu	Gallons	Gallons	MMBtu
		1990	0	0	0
		1991	0	0	0
		1992	0	0	0
		1993	0	0	0
		1994	0	0	0
		1995	0	0	0
		1996	0	0	0
		1997	0	0	0
		1998	0	0	0
		1999	0	0	0
		2000	0	0	0
		2001	0	0	0
		2002	0	0	0
		2003	0	0	0
		2004	0	0	0
		2005	0	0	0
		2006	0	0	0
		2007	0	0	0
		2008	0	0	0
		2009	0	0	0
		2010	0	0	0
		2011	0	0	0
		2012	3.43567e+07	0	1.31442e+06	1338	15	106	129	186	803474	21000																						45379													10004	1151
		2013	0	0	0	1346			129	186	803474	21000																						54994													10004	1151
		Note: Signatories of the ACUPCC should reference the Implementation Guide, as they have specified definitions for many data categories. You may gather
			data for the categories that differ in the		ACUPCC Reporting Worksheet.		For guidance reference the		ACUPCC Implementation Guide (pdf).
	©2001-2012 Clean Air-Cool Planet, Inc. All rights reserved
	Clean Air-Cool Planet, Campus Carbon Calculator, and the Clean Air-Cool Planet logo are trademarks of Clean Air-Cool Planet, Inc.
[truncated: 74 more columns]

## Sheet: Input_InflAdj
	On this Worksheet: Original budget values, and values adjusted for inflation
	MODULE	Input
	WORKSHEET	Inflation Adjustment: Enter your budget values in the left-hand columns and they will be adjusted for inflation.
	UNIVERSITY	Austin College
		Budget			Conversion	Budget Adjusted for Inflation
	Fiscal Year	Operating Budget	Research Dollars	Energy Budget	Deflator	Operating Budget	Research Dollars	Energy Budget
		$	$	$	$ (2005)	$	$	$
	1990				0.722	0	0	0
	1991				0.74726	0	0	0
	1992				0.76444	0	0	0
	1993				0.7821	0	0	0
	1994				0.79872	0	0	0
	1995				0.81506	0	0	0
	1996				0.83051	0	0	0
	1997				0.84433	0	0	0
	1998				0.8537	0	0	0
	1999				0.86605	0	0	0
	2000				0.88492	0	0	0
	2001				0.90615	0	0	0
	2002				0.92197	0	0	0
	2003				0.94159	0	0	0
	2004				0.96833	0	0	0
	2005				1	0	0	0
	2006				1.03153	0	0	0
	2007				1.05887	0	0	0
	2008				1.08105	0	0	0
	2009				1.10057	0	0	0
	2010				1.12153	0	0	0
	2011				1.14197	0	0	0
	2012	39966810		1529047	1.16329	3.43567e+07	0	1.31442e+06
	2013				1.18417	0	0	0
	2014				1.20462	0	0	0
	2015				1.22491	0	0	0
	2016				1.24577	0	0	0
	2017				1.26744	0	0	0
	2018				1.28932	0	0	0
	2019				1.31211	0	0	0
	2020				1.33541	0	0	0
	2021				1.35953	0	0	0
	2022				1.3855	0	0	0
	2023				1.41322	0	0	0
	2024				1.44201	0	0	0
	2025				1.47204	0	0	0
	2026				1.5028	0	0	0
	2027				1.53356	0	0	0
	2028				1.56401	0	0	0
	2029				1.59483	0	0	0
	2030				1.6261	0	0	0
	2031				1.64834	0	0	0
	2032				1.67059	0	0	0
	2033				1.69283	0	0	0
	2034				1.71508	0	0	0
	2035				1.73732	0	0	0
	2036				1.75956	0	0	0
	2037				1.78181	0	0	0
	2038				1.80405	0	0	0
	2039				1.8263	0	0	0
	2040				1.84854	0	0	0
	2041				1.87078	0	0	0
	2042				1.89303	0	0	0
	2043				1.91527	0	0	0
	2044				1.93752	0	0	0
	2045				1.95976	0	0	0
	2046				1.98201	0	0	0
	2047				2.00425	0	0	0
	2048				2.02649	0	0	0
	2049				2.04874	0	0	0
	2050				2.07098	0	0	0
	2051				2.09323	0	0	0
	2052				2.11547	0	0	0
	2053				2.13771	0	0	0
	2054				2.15996	0	0	0
	2055				2.1822	0	0	0
	2056				2.20445	0	0	0
	2057				2.22669	0	0	0
	2058				2.24893	0	0	0
	2059				2.27118	0	0	0
	2060				2.29342	0	0	0
	Source:				19
	Source 2:				20
				Slope	0.0222441
©2001-2010 Clean Air-Cool Planet, Inc. All rights reserved
Clean Air-Cool Planet, Campus Carbon Calculator, and the Clean Air-Cool Planet logo are trademarks of Clean Air-Cool Planet, Inc.

## Sheet: CustFuelMix
	On this Worksheet: If you know the exact fuel mix of your electric utility, enter it on this sheet.
	MODULE	Input
	WORKSHEET	Custom Fuel Mix
	UNIVERSITY	Austin College
	Fiscal Year	Total Electricity Purchased	Net Purchased	Coal	Natural Gas	Distillate Oil (#1-#4)	Residual Oil (#5-#6)	Nuclear	Waste to Energy	Hydro-Electric	Biomass	Renewable (wind, solar)	Total Percentage
		(kWh)	(%)	(%)	(%)	(%)	(%)	(%)	(%)	(%)	(%)	(%)	(%)
	1990	0											0
	1991	0											0
	1992	0											0
	1993	0											0
	1994	0											0
	1995	0											0
	1996	0											0
	1997	0											0
	1998	0											0
	1999	0											0
	2000	0											0
	2001	0											0
	2002	0											0
	2003	0											0
	2004	0											0
	2005	0											0
	2006	0											0
	2007	0											0
	2008	0											0
	2009	0											0
	2010	0											0
	2011	0											0
	2012	12934735											0
	2013	13839381											0
	2014	14744027	0	0	0	0	0	0	0	0	0	0	0
	2015	15648673	0	0	0	0	0	0	0	0	0	0	0
	2016	16553319	0	0	0	0	0	0	0	0	0	0	0
	2017	17457965	0	0	0	0	0	0	0	0	0	0	0
	2018	18362611	0	0	0	0	0	0	0	0	0	0	0
	2019	19267257	0	0	0	0	0	0	0	0	0	0	0
	2020	20171903	0	0	0	0	0	0	0	0	0	0	0
	2021	21076549	0	0	0	0	0	0	0	0	0	0	0
	2022	21981195	0	0	0	0	0	0	0	0	0	0	0
	2023	22885841	0	0	0	0	0	0	0	0	0	0	0
	2024	23790487	0	0	0	0	0	0	0	0	0	0	0
	2025	24695133	0	0	0	0	0	0	0	0	0	0	0
	2026	25599779	0	0	0	0	0	0	0	0	0	0	0
	2027	26504425	0	0	0	0	0	0	0	0	0	0	0
	2028	27409071	0	0	0	0	0	0	0	0	0	0	0
	2029	28313717	0	0	0	0	0	0	0	0	0	0	0
	2030	29218363	0	0	0	0	0	0	0	0	0	0	0
	2031	30123009	0	0	0	0	0	0	0	0	0	0	0
	2032	31027655	0	0	0	0	0	0	0	0	0	0	0
	2033	31932301	0	0	0	0	0	0	0	0	0	0	0
	2034	32836947	0	0	0	0	0	0	0	0	0	0	0
	2035	33741593	0	0	0	0	0	0	0	0	0	0	0
	2036	34646239	0	0	0	0	0	0	0	0	0	0	0
	2037	35550885	0	0	0	0	0	0	0	0	0	0	0
	2038	36455531	0	0	0	0	0	0	0	0	0	0	0
	2039	37360177	0	0	0	0	0	0	0	0	0	0	0
	2040	38264823	0	0	0	0	0	0	0	0	0	0	0
	2041	39169469	0	0	0	0	0	0	0	0	0	0	0
	2042	40074115	0	0	0	0	0	0	0	0	0	0	0
	2043	40978761	0	0	0	0	0	0	0	0	0	0	0
	2044	41883407	0	0	0	0	0	0	0	0	0	0	0
	2045	42788053	0	0	0	0	0	0	0	0	0	0	0
	2046	43692699	0	0	0	0	0	0	0	0	0	0	0
	2047	44597345	0	0	0	0	0	0	0	0	0	0	0
	2048	45501991	0	0	0	0	0	0	0	0	0	0	0
	2049	46406637	0	0	0	0	0	0	0	0	0	0	0
	2050	47311283	0	0	0	0	0	0	0	0	0	0	0
	2051	48215929	0	0	0	0	0	0	0	0	0	0	0
	2052	49120575	0	0	0	0	0	0	0	0	0	0	0
	2053	50025221	0	0	0	0	0	0	0	0	0	0	0
	2054	50929867	0	0	0	0	0	0	0	0	0	0	0
	2055	51834513	0	0	0	0	0	0	0	0	0	0	0
	2056	52739159	0	0	0	0	0	0	0	0	0	0	0
	2057	53643805	0	0	0	0	0	0	0	0	0	0	0
	2058	54548451	0	0	0	0	0	0	0	0	0	0	0
	2059	55453097	0	0	0	0	0	0	0	0	0	0	0
	2060	56357743	0	0	0	0	0	0	0	0	0	0	0
	©2001-2010 Clean Air-Cool Planet, Inc. All rights reserved
	Clean Air-Cool Planet, Campus Carbon Calculator, and the Clean Air-Cool Planet logo are trademarks of Clean Air-Cool Planet, Inc.

## Sheet: Input_Commuter
	On this Worksheet: Estimates of commuter miles traveled for faculty, staff, and students.
	MODULE	Input
	WORKSHEET	Commuter Traffic
	UNIVERSITY	Austin College
		STUDENTS																								Summary - Students													FACULTY
		1) Trips / Week			2) Weeks / Year	3) Trip Distribution (% Trips by Mode)								4) Trip Distance (Miles per One-Way Trip for Each Mode)							Fuel Efficiencies Used in Calculations					Summary - Students													1) Trips / Week			2) Weeks / Year	3) Trip Distribution (% Trips by Mode)
	Fiscal Year	Students Commuters	One-Way Trips / Week	Total Commuter Trips / Week	Weeks / Year	Bike	Walk	Drive Alone	Carpool	Bus	Light Rail	Commuter Rail	Total	Bike	Walk	Drive Alone	Carpool	Bus	Light Rail	Commuter Rail	Automobile Fuel Efficiency	Bus fuel efficiency	Light rail fuel efficiency	Commuter rail fuel efficiency - diesel	Commuter rail fuel efficiency - electric	Biking		Walking		Automobile Commuting		Bus Commuting		Light Rail Commuting		Commuter Rail Commuting			Faculty Commuters	One-Way Trips / Week	Total Commuter Trips / Week	Weeks / Year	Bike	Walk	Drive Alone	Carpool	Bus	Light Rail	Commuter Rail
		#	#	#	#	%	%	%	%	%	%	%	%	Passenger Miles	Passenger Miles	Vehicle Miles	Vehicle Miles	Passenger Miles	Passenger Miles	Passenger Miles	MPG	MPG / Passenger	Passenger Miles / kWh	Passenger Miles / Gallon	Passenger Miles / kWh	Total Miles	Fuel Consumed	Total Miles	Fuel Consumed	Total Miles	Gallons Gasoline	Total Miles	Gallons Diesel	Total Miles	kWh	Total Miles	Gallons Diesel	kWh	#	#	#	#	%	%	%	%	%	%	%
	1990			0									0								20.9246	37.2564	3.48368	134.432	5.77651	0	0	0	0	0	0	0	0	0	0	0	0	0			0
	1991			0									0								21.7646	36.8152	3.29358	135.211	5.92736	0	0	0	0	0	0	0	0	0	0	0	0	0			0
	1992			0									0								21.6014	34.3485	3.22751	133.21	6.51246	0	0	0	0	0	0	0	0	0	0	0	0	0			0
	1993			0									0								21.121	35.1669	3.12276	116.12	5.80268	0	0	0	0	0	0	0	0	0	0	0	0	0			0
	1994			0									0								21.2756	33.3272	2.93051	129.176	6.42765	0	0	0	0	0	0	0	0	0	0	0	0	0			0
	1995			0									0								21.693	32.5702	2.82543	130.724	6.57941	0	0	0	0	0	0	0	0	0	0	0	0	0			0
	1996			0									0								21.7836	32.2517	2.77661	134.937	6.65418	0	0	0	0	0	0	0	0	0	0	0	0	0			0
	1997			0									0								22.0333	33.3783	2.78512	127.194	6.32913	0	0	0	0	0	0	0	0	0	0	0	0	0			0
	1998			0									0								22.1453	33.595	2.92791	125.78	6.70054	0	0	0	0	0	0	0	0	0	0	0	0	0			0
	1999			0									0								21.9717	33.9135	2.93791	120.074	6.63086	0	0	0	0	0	0	0	0	0	0	0	0	0			0
	2000			0									0								22.4648	32.5042	2.66026	132.763	6.86277	0	0	0	0	0	0	0	0	0	0	0	0	0			0
	2001			0									0								22.7378	33.0713	2.50177	132.236	7.0517	0	0	0	0	0	0	0	0	0	0	0	0	0			0
	2002			0									0								22.5956	32.7969	2.487	130.465	7.12444	0	0	0	0	0	0	0	0	0	0	0	0	0			0
	2003			0									0								22.8151	31.8652	2.5957	132.279	6.91179	0	0	0	0	0	0	0	0	0	0	0	0	0			0
	2004			0									0								23.221	30.6268	2.48549	134.988	6.70738	0	0	0	0	0	0	0	0	0	0	0	0	0			0
	2005			0									0								22.9368	31.6891	2.48375	123.485	6.38342	0	0	0	0	0	0	0	0	0	0	0	0	0			0
	2006			0									0								23.4232	30.8878	2.53696	131.819	7.01015	0	0	0	0	0	0	0	0	0	0	0	0	0			0
	2007			0									0								24.1267	31.7601	2.57558	138.203	6.32615	0	0	0	0	0	0	0	0	0	0	0	0	0			0
	2008			0									0								24.2556	32.3558	2.56246	132.323	6.43132	0	0	0	0	0	0	0	0	0	0	0	0	0			0
	2009			0									0								24.1748	31.9319	2.71172	118.232	6.31011	0	0	0	0	0	0	0	0	0	0	0	0	0			0
	2010			0									0								24.1702	31.9319	2.65975	116.674	6.0512	0	0	0	0	0	0	0	0	0	0	0	0	0			0
	2011			0									0								24.1702	31.9319	2.65975	116.674	6.0512	0	0	0	0	0	0	0	0	0	0	0	0	0			0
	2012			0									0								24.1702	31.9319	2.65975	116.674	6.0512	0	0	0	0	0	0	0	0	0	0	0	0	0			0
	2013			0									0								24.1702	31.9319	2.65975	116.674	6.0512	0	0	0	0	0	0	0	0	0	0	0	0	0			0
	2014			0									0								24.1702	31.9319	2.65975	116.674	6.0512	0	0	0	0	0	0	0	0	0	0	0	0	0			0
	2015			0									0								24.1702	31.9319	2.65975	116.674	6.0512	0	0	0	0	0	0	0	0	0	0	0	0	0			0
	2016			0									0								24.1702	31.9319	2.65975	116.674	6.0512	0	0	0	0	0	0	0	0	0	0	0	0	0			0
	2017			0									0								24.1702	31.9319	2.65975	116.674	6.0512	0	0	0	0	0	0	0	0	0	0	0	0	0			0
	2018			0									0								24.1702	31.9319	2.65975	116.674	6.0512	0	0	0	0	0	0	0	0	0	0	0	0	0			0
	2019			0									0								24.1702	31.9319	2.65975	116.674	6.0512	0	0	0	0	0	0	0	0	0	0	0	0	0			0
	2020			0									0								24.1702	31.9319	2.65975	116.674	6.0512	0	0	0	0	0	0	0	0	0	0	0	0	0			0
	2021			0									0								24.1702	31.9319	2.65975	116.674	6.0512	0	0	0	0	0	0	0	0	0	0	0	0	0			0
	2022			0									0								24.1702	31.9319	2.65975	116.674	6.0512	0	0	0	0	0	0	0	0	0	0	0	0	0			0
	2023			0									0								24.1702	31.9319	2.65975	116.674	6.0512	0	0	0	0	0	0	0	0	0	0	0	0	0			0
	2024			0									0								24.1702	31.9319	2.65975	116.674	6.0512	0	0	0	0	0	0	0	0	0	0	0	0	0			0
	2025			0									0								24.1702	31.9319	2.65975	116.674	6.0512	0	0	0	0	0	0	0	0	0	0	0	0	0			0
	2026			0									0								24.1702	31.9319	2.65975	116.674	6.0512	0	0	0	0	0	0	0	0	0	0	0	0	0			0
	2027			0									0								24.1702	31.9319	2.65975	116.674	6.0512	0	0	0	0	0	0	0	0	0	0	0	0	0			0
	2028			0									0								24.1702	31.9319	2.65975	116.674	6.0512	0	0	0	0	0	0	0	0	0	0	0	0	0			0
	2029			0									0								24.1702	31.9319	2.65975	116.674	6.0512	0	0	0	0	0	0	0	0	0	0	0	0	0			0
	2030			0									0								24.1702	31.9319	2.65975	116.674	6.0512	0	0	0	0	0	0	0	0	0	0	0	0	0			0
	2031			0									0								24.1702	31.9319	2.65975	116.674	6.0512	0	0	0	0	0	0	0	0	0	0	0	0	0			0
	2032			0									0								24.1702	31.9319	2.65975	116.674	6.0512	0	0	0	0	0	0	0	0	0	0	0	0	0			0
	2033			0									0								24.1702	31.9319	2.65975	116.674	6.0512	0	0	0	0	0	0	0	0	0	0	0	0	0			0
	2034			0									0								24.1702	31.9319	2.65975	116.674	6.0512	0	0	0	0	0	0	0	0	0	0	0	0	0			0
	2035			0									0								24.1702	31.9319	2.65975	116.674	6.0512	0	0	0	0	0	0	0	0	0	0	0	0	0			0
	2036			0									0								24.1702	31.9319	2.65975	116.674	6.0512	0	0	0	0	0	0	0	0	0	0	0	0	0			0
	2037			0									0								24.1702	31.9319	2.65975	116.674	6.0512	0	0	0	0	0	0	0	0	0	0	0	0	0			0
	2038			0									0								24.1702	31.9319	2.65975	116.674	6.0512	0	0	0	0	0	0	0	0	0	0	0	0	0			0
	2039			0									0								24.1702	31.9319	2.65975	116.674	6.0512	0	0	0	0	0	0	0	0	0	0	0	0	0			0
	2040			0									0								24.1702	31.9319	2.65975	116.674	6.0512	0	0	0	0	0	0	0	0	0	0	0	0	0			0
	2041			0									0								24.1702	31.9319	2.65975	116.674	6.0512	0	0	0	0	0	0	0	0	0	0	0	0	0			0
	2042			0									0								24.1702	31.9319	2.65975	116.674	6.0512	0	0	0	0	0	0	0	0	0	0	0	0	0			0
	2043			0									0								24.1702	31.9319	2.65975	116.674	6.0512	0	0	0	0	0	0	0	0	0	0	0	0	0			0
	2044			0									0								24.1702	31.9319	2.65975	116.674	6.0512	0	0	0	0	0	0	0	0	0	0	0	0	0			0
	2045			0									0								24.1702	31.9319	2.65975	116.674	6.0512	0	0	0	0	0	0	0	0	0	0	0	0	0			0
	2046			0									0								24.1702	31.9319	2.65975	116.674	6.0512	0	0	0	0	0	0	0	0	0	0	0	0	0			0
	2047			0									0								24.1702	31.9319	2.65975	116.674	6.0512	0	0	0	0	0	0	0	0	0	0	0	0	0			0
	2048			0									0								24.1702	31.9319	2.65975	116.674	6.0512	0	0	0	0	0	0	0	0	0	0	0	0	0			0
	2049			0									0								24.1702	31.9319	2.65975	116.674	6.0512	0	0	0	0	0	0	0	0	0	0	0	0	0			0
	2050			0									0								24.1702	31.9319	2.65975	116.674	6.0512	0	0	0	0	0	0	0	0	0	0	0	0	0			0
	2051			0									0								24.1702	31.9319	2.65975	116.674	6.0512	0	0	0	0	0	0	0	0	0	0	0	0	0			0
	2052			0									0								24.1702	31.9319	2.65975	116.674	6.0512	0	0	0	0	0	0	0	0	0	0	0	0	0			0
	2053			0									0								24.1702	31.9319	2.65975	116.674	6.0512	0	0	0	0	0	0	0	0	0	0	0	0	0			0
	2054			0									0								24.1702	31.9319	2.65975	116.674	6.0512	0	0	0	0	0	0	0	0	0	0	0	0	0			0
	2055			0									0								24.1702	31.9319	2.65975	116.674	6.0512	0	0	0	0	0	0	0	0	0	0	0	0	0			0
	2056			0									0								24.1702	31.9319	2.65975	116.674	6.0512	0	0	0	0	0	0	0	0	0	0	0	0	0			0
	2057			0									0								24.1702	31.9319	2.65975	116.674	6.0512	0	0	0	0	0	0	0	0	0	0	0	0	0			0
	2058			0									0								24.1702	31.9319	2.65975	116.674	6.0512	0	0	0	0	0	0	0	0	0	0	0	0	0			0
	2059			0									0								24.1702	31.9319	2.65975	116.674	6.0512	0	0	0	0	0	0	0	0	0	0	0	0	0			0
	2060			0									0								24.1702	31.9319	2.65975	116.674	6.0512	0	0	0	0	0	0	0	0	0	0	0	0	0			0
				Total Commuter Trips / Week = Number of Commuters * One-Way Trips / Week									Total % Mode Splits = Sum of all % Trips Made by Each Mode								3	3	35	35	35	Total Distance = Total Trips / Week * Weeks / Year * % Trips by Bike * Miles / Trip	Assuming bikers do not use any fuel.	Total Distance = Total Trips / Week * Weeks / Year * % Trips by Foot * Miles / Trip	Assuming pedestrians do not use any fuel.	Total Distance = ((Total Trips / Week * Weeks / Year * % Trips Driven Alone * Miles / Trip) + (Total Trips / Week * Weeks / Year * % Carpool * Miles / Trip % Carpool)/2)	Fuel Consumption = Total Distance / Fuel Efficiency	Total Distance = Total Trips / Week * Weeks / Year * % Trips by Bus * Miles / Trip	Fuel Consumption = Total Distance / Fuel Efficiency	Total Distance = Total Trips / Week * Weeks / Year * % Trips by Light Rail * Miles / Trip	Fuel Consumption = Total Distance / Fuel Efficiency	Total Distance = Total Trips / Week * Weeks / Year * % Trips by Commuter Rail * Miles / Trip	Fuel Consumption = Total Distance / Fuel Efficiency	Fuel Consumption = Total Distance / Fuel Efficiency			Total Commuter Trips / Week = Number of Commuters * One-Way Trips / Week
	©2001-2010 Clean Air-Cool Planet, Inc. All rights reserved
	Clean Air-Cool Planet, Campus Carbon Calculator, and the Clean Air-Cool Planet logo are trademarks of Clean Air-Cool Planet, Inc.
[truncated: 76 more columns]

## Sheet: S_CO2
	On this Worksheet: CO2 emissions from all sources. These numbers are the product of the emission factor and the input data. Some sources have no formulas because they have no CO2 emissions, but are included to keep formatting consistent.
	MODULE	Summary
	WORKSHEET	CO2
	UNIVERSITY	Austin College
		--- Scope 1 Emissions Sources ---
		On-Campus Stationary Sources																														Direct Transportation Sources										Refrigerants & Chemicals						Agriculture Sources
	Fiscal Year	On-Campus Cogeneration Plant(s)															Other On-Campus Stationary Sources															University Fleet										Refrigerants & Chemicals						Fertilizer
		Residual Oil (#5-6)	Distillate Oil (#1-4)	Natural Gas	LPG (Propane)	Coal (Steam Coal)	Incinerated Waste	Wood Chips	Wood Pellets	Grass Pellets	Residual BioHeat	Distillate BioHeat	Attributable Solar - Electric	Attributable Solar - Thermal	Attributable Wind	Other Biogenic	Residual Oil (#5-6)	Distillate Oil (#1-4)	Natural Gas	LPG (Propane)	Coal (Steam Coal)	Incinerated Waste	Wood Chips	Wood Pellets	Grass Pellets	Residual BioHeat	Distillate BioHeat	Attributable Solar - Electric	Attributable Solar - Thermal	Attributable Wind	Other Biogenic	Gasoline Fleet	Diesel Fleet	Natural Gas Fleet	E85 Fleet	B5 Fleet	B20 Fleet	B100	Hydrogen	Other Fleet Fuel	Electric Fleet	HFC-134a	HFC-404a	HCFC-22	HFC - 410a	HG-10	Other	Synthetic	Organic
		kg CO2	kg CO2	kg CO2	kg CO2	kg CO2	kg CO2	kg CO2	kg CO2	kg CO2	kg CO2	kg CO2	kWh	MMBtu	kWh	kg CO2	kg CO2	kg CO2	kg CO2	kg CO2	kg CO2	kg CO2	kg CO2	kg CO2	kg CO2	kg CO2	kg CO2	kWh	MMBtu	kWh	kg CO2	kg CO2	kg CO2	kg CO2	kg CO2	kg CO2	kg CO2	kg CO2	kg CO2	kg CO2	kg CO2	kg CO2	kg CO2	kg CO2	kg CO2	kg CO2	kg CO2	kg CO2	kg CO2
	1990	0	0	0	0	0	0	0	0	0	0	0				0	0	0	0	0	0	0	0	0	0	0	0				0	0	0	0	0	0	0	0	0	0	0
	1991	0	0	0	0	0	0	0	0	0	0	0				0	0	0	0	0	0	0	0	0	0	0	0				0	0	0	0	0	0	0	0	0	0	0
	1992	0	0	0	0	0	0	0	0	0	0	0				0	0	0	0	0	0	0	0	0	0	0	0				0	0	0	0	0	0	0	0	0	0	0
	1993	0	0	0	0	0	0	0	0	0	0	0				0	0	0	0	0	0	0	0	0	0	0	0				0	0	0	0	0	0	0	0	0	0	0
	1994	0	0	0	0	0	0	0	0	0	0	0				0	0	0	0	0	0	0	0	0	0	0	0				0	0	0	0	0	0	0	0	0	0	0
	1995	0	0	0	0	0	0	0	0	0	0	0				0	0	0	0	0	0	0	0	0	0	0	0				0	0	0	0	0	0	0	0	0	0	0
	1996	0	0	0	0	0	0	0	0	0	0	0				0	0	0	0	0	0	0	0	0	0	0	0				0	0	0	0	0	0	0	0	0	0	0
	1997	0	0	0	0	0	0	0	0	0	0	0				0	0	0	0	0	0	0	0	0	0	0	0				0	0	0	0	0	0	0	0	0	0	0
	1998	0	0	0	0	0	0	0	0	0	0	0				0	0	0	0	0	0	0	0	0	0	0	0				0	0	0	0	0	0	0	0	0	0	0
	1999	0	0	0	0	0	0	0	0	0	0	0				0	0	0	0	0	0	0	0	0	0	0	0				0	0	0	0	0	0	0	0	0	0	0
	2000	0	0	0	0	0	0	0	0	0	0	0				0	0	0	0	0	0	0	0	0	0	0	0				0	0	0	0	0	0	0	0	0	0	0
	2001	0	0	0	0	0	0	0	0	0	0	0				0	0	0	0	0	0	0	0	0	0	0	0				0	0	0	0	0	0	0	0	0	0	0
	2002	0	0	0	0	0	0	0	0	0	0	0				0	0	0	0	0	0	0	0	0	0	0	0				0	0	0	0	0	0	0	0	0	0	0
	2003	0	0	0	0	0	0	0	0	0	0	0				0	0	0	0	0	0	0	0	0	0	0	0				0	0	0	0	0	0	0	0	0	0	0
	2004	0	0	0	0	0	0	0	0	0	0	0				0	0	0	0	0	0	0	0	0	0	0	0				0	0	0	0	0	0	0	0	0	0	0
	2005	0	0	0	0	0	0	0	0	0	0	0				0	0	0	0	0	0	0	0	0	0	0	0				0	0	0	0	0	0	0	0	0	0	0
	2006	0	0	0	0	0	0	0	0	0	0	0				0	0	0	0	0	0	0	0	0	0	0	0				0	0	0	0	0	0	0	0	0	0	0
	2007	0	0	0	0	0	0	0	0	0	0	0				0	0	0	0	0	0	0	0	0	0	0	0				0	0	0	0	0	0	0	0	0	0	0
	2008	0	0	0	0	0	0	0	0	0	0	0				0	0	0	0	0	0	0	0	0	0	0	0				0	0	0	0	0	0	0	0	0	0	0
	2009	0	0	0	0	0	0	0	0	0	0	0				0	0	0	0	0	0	0	0	0	0	0	0				0	0	0	0	0	0	0	0	0	0	0
	2010	0	0	0	0	0	0	0	0	0	0	0				0	0	0	0	0	0	0	0	0	0	0	0				0	0	0	0	0	0	0	0	0	0	0
	2011	0	0	0	0	0	0	0	0	0	0	0				0	0	0	0	0	0	0	0	0	0	0	0				0	0	0	0	0	0	0	0	0	0	0
	2012	0	0	0	0	0	0	0	0	0	0	0				0	0	0	2.40599e+06	0	0	0	0	0	0	0	0				0	88683.5	11805.9	0	0	0	0	0	0	0	0
	2013	0	0	0	0	0	0	0	0	0	0	0				0	0	0	2.91578e+06	0	0	0	0	0	0	0	0				0	88683.5	11805.9	0	0	0	0	0	0	0	0
	2014	0	0	0	0	0	0	0	0	0	0	0				0	0	0	3.42557e+06	0	0	0	0	0	0	0	0				0	88683.5	11805.9	0	0	0	0	0	0	0	0
	2015	0	0	0	0	0	0	0	0	0	0	0				0	0	0	3.93536e+06	0	0	0	0	0	0	0	0				0	88683.5	11805.9	0	0	0	0	0	0	0	0
	2016	0	0	0	0	0	0	0	0	0	0	0				0	0	0	4.44514e+06	0	0	0	0	0	0	0	0				0	88683.5	11805.9	0	0	0	0	0	0	0	0
	2017	0	0	0	0	0	0	0	0	0	0	0				0	0	0	4.95493e+06	0	0	0	0	0	0	0	0				0	88683.5	11805.9	0	0	0	0	0	0	0	0
	2018	0	0	0	0	0	0	0	0	0	0	0				0	0	0	5.46472e+06	0	0	0	0	0	0	0	0				0	88683.5	11805.9	0	0	0	0	0	0	0	0
	2019	0	0	0	0	0	0	0	0	0	0	0				0	0	0	5.97451e+06	0	0	0	0	0	0	0	0				0	88683.5	11805.9	0	0	0	0	0	0	0	0
	2020	0	0	0	0	0	0	0	0	0	0	0				0	0	0	6.48429e+06	0	0	0	0	0	0	0	0				0	88683.5	11805.9	0	0	0	0	0	0	0	0
	2021	0	0	0	0	0	0	0	0	0	0	0				0	0	0	6.99408e+06	0	0	0	0	0	0	0	0				0	88683.5	11805.9	0	0	0	0	0	0	0	0
	2022	0	0	0	0	0	0	0	0	0	0	0				0	0	0	7.50387e+06	0	0	0	0	0	0	0	0				0	88683.5	11805.9	0	0	0	0	0	0	0	0
	2023	0	0	0	0	0	0	0	0	0	0	0				0	0	0	8.01365e+06	0	0	0	0	0	0	0	0				0	88683.5	11805.9	0	0	0	0	0	0	0	0
	2024	0	0	0	0	0	0	0	0	0	0	0				0	0	0	8.52344e+06	0	0	0	0	0	0	0	0				0	88683.5	11805.9	0	0	0	0	0	0	0	0
	2025	0	0	0	0	0	0	0	0	0	0	0				0	0	0	9.03323e+06	0	0	0	0	0	0	0	0				0	88683.5	11805.9	0	0	0	0	0	0	0	0
	2026	0	0	0	0	0	0	0	0	0	0	0				0	0	0	9.54302e+06	0	0	0	0	0	0	0	0				0	88683.5	11805.9	0	0	0	0	0	0	0	0
	2027	0	0	0	0	0	0	0	0	0	0	0				0	0	0	1.00528e+07	0	0	0	0	0	0	0	0				0	88683.5	11805.9	0	0	0	0	0	0	0	0
	2028	0	0	0	0	0	0	0	0	0	0	0				0	0	0	1.05626e+07	0	0	0	0	0	0	0	0				0	88683.5	11805.9	0	0	0	0	0	0	0	0
	2029	0	0	0	0	0	0	0	0	0	0	0				0	0	0	1.10724e+07	0	0	0	0	0	0	0	0				0	88683.5	11805.9	0	0	0	0	0	0	0	0
	2030	0	0	0	0	0	0	0	0	0	0	0				0	0	0	1.15822e+07	0	0	0	0	0	0	0	0				0	88683.5	11805.9	0	0	0	0	0	0	0	0
	2031	0	0	0	0	0	0	0	0	0	0	0				0	0	0	1.2092e+07	0	0	0	0	0	0	0	0				0	88683.5	11805.9	0	0	0	0	0	0	0	0
	2032	0	0	0	0	0	0	0	0	0	0	0				0	0	0	1.26017e+07	0	0	0	0	0	0	0	0				0	88683.5	11805.9	0	0	0	0	0	0	0	0
	2033	0	0	0	0	0	0	0	0	0	0	0				0	0	0	1.31115e+07	0	0	0	0	0	0	0	0				0	88683.5	11805.9	0	0	0	0	0	0	0	0
	2034	0	0	0	0	0	0	0	0	0	0	0				0	0	0	1.36213e+07	0	0	0	0	0	0	0	0				0	88683.5	11805.9	0	0	0	0	0	0	0	0
	2035	0	0	0	0	0	0	0	0	0	0	0				0	0	0	1.41311e+07	0	0	0	0	0	0	0	0				0	88683.5	11805.9	0	0	0	0	0	0	0	0
	2036	0	0	0	0	0	0	0	0	0	0	0				0	0	0	1.46409e+07	0	0	0	0	0	0	0	0				0	88683.5	11805.9	0	0	0	0	0	0	0	0
	2037	0	0	0	0	0	0	0	0	0	0	0				0	0	0	1.51507e+07	0	0	0	0	0	0	0	0				0	88683.5	11805.9	0	0	0	0	0	0	0	0
	2038	0	0	0	0	0	0	0	0	0	0	0				0	0	0	1.56605e+07	0	0	0	0	0	0	0	0				0	88683.5	11805.9	0	0	0	0	0	0	0	0
	2039	0	0	0	0	0	0	0	0	0	0	0				0	0	0	1.61703e+07	0	0	0	0	0	0	0	0				0	88683.5	11805.9	0	0	0	0	0	0	0	0
	2040	0	0	0	0	0	0	0	0	0	0	0				0	0	0	1.668e+07	0	0	0	0	0	0	0	0				0	88683.5	11805.9	0	0	0	0	0	0	0	0
	2041	0	0	0	0	0	0	0	0	0	0	0				0	0	0	1.71898e+07	0	0	0	0	0	0	0	0				0	88683.5	11805.9	0	0	0	0	0	0	0	0
	2042	0	0	0	0	0	0	0	0	0	0	0				0	0	0	1.76996e+07	0	0	0	0	0	0	0	0				0	88683.5	11805.9	0	0	0	0	0	0	0	0
	2043	0	0	0	0	0	0	0	0	0	0	0				0	0	0	1.82094e+07	0	0	0	0	0	0	0	0				0	88683.5	11805.9	0	0	0	0	0	0	0	0
	2044	0	0	0	0	0	0	0	0	0	0	0				0	0	0	1.87192e+07	0	0	0	0	0	0	0	0				0	88683.5	11805.9	0	0	0	0	0	0	0	0
	2045	0	0	0	0	0	0	0	0	0	0	0				0	0	0	1.9229e+07	0	0	0	0	0	0	0	0				0	88683.5	11805.9	0	0	0	0	0	0	0	0
	2046	0	0	0	0	0	0	0	0	0	0	0				0	0	0	1.97388e+07	0	0	0	0	0	0	0	0				0	88683.5	11805.9	0	0	0	0	0	0	0	0
	2047	0	0	0	0	0	0	0	0	0	0	0				0	0	0	2.02486e+07	0	0	0	0	0	0	0	0				0	88683.5	11805.9	0	0	0	0	0	0	0	0
	2048	0	0	0	0	0	0	0	0	0	0	0				0	0	0	2.07583e+07	0	0	0	0	0	0	0	0				0	88683.5	11805.9	0	0	0	0	0	0	0	0
	2049	0	0	0	0	0	0	0	0	0	0	0				0	0	0	2.12681e+07	0	0	0	0	0	0	0	0				0	88683.5	11805.9	0	0	0	0	0	0	0	0
	2050	0	0	0	0	0	0	0	0	0	0	0				0	0	0	2.17779e+07	0	0	0	0	0	0	0	0				0	88683.5	11805.9	0	0	0	0	0	0	0	0
	2051	0	0	0	0	0	0	0	0	0	0	0				0	0	0	2.22877e+07	0	0	0	0	0	0	0	0				0	88683.5	11805.9	0	0	0	0	0	0	0	0
	2052	0	0	0	0	0	0	0	0	0	0	0				0	0	0	2.27975e+07	0	0	0	0	0	0	0	0				0	88683.5	11805.9	0	0	0	0	0	0	0	0
	2053	0	0	0	0	0	0	0	0	0	0	0				0	0	0	2.33073e+07	0	0	0	0	0	0	0	0				0	88683.5	11805.9	0	0	0	0	0	0	0	0
	2054	0	0	0	0	0	0	0	0	0	0	0				0	0	0	2.38171e+07	0	0	0	0	0	0	0	0				0	88683.5	11805.9	0	0	0	0	0	0	0	0
	2055	0	0	0	0	0	0	0	0	0	0	0				0	0	0	2.43268e+07	0	0	0	0	0	0	0	0				0	88683.5	11805.9	0	0	0	0	0	0	0	0
	2056	0	0	0	0	0	0	0	0	0	0	0				0	0	0	2.48366e+07	0	0	0	0	0	0	0	0				0	88683.5	11805.9	0	0	0	0	0	0	0	0
	2057	0	0	0	0	0	0	0	0	0	0	0				0	0	0	2.53464e+07	0	0	0	0	0	0	0	0				0	88683.5	11805.9	0	0	0	0	0	0	0	0
	2058	0	0	0	0	0	0	0	0	0	0	0				0	0	0	2.58562e+07	0	0	0	0	0	0	0	0				0	88683.5	11805.9	0	0	0	0	0	0	0	0
	2059	0	0	0	0	0	0	0	0	0	0	0				0	0	0	2.6366e+07	0	0	0	0	0	0	0	0				0	88683.5	11805.9	0	0	0	0	0	0	0	0
	2060	0	0	0	0	0	0	0	0	0	0	0				0	0	0	2.68758e+07	0	0	0	0	0	0	0	0				0	88683.5	11805.9	0	0	0	0	0	0	0	0
	©2001-2009 Clean Air-Cool Planet, Inc. All rights reserved
[truncated: 58 more columns]

## Sheet: S_CH4
	On this Worksheet: CH4 emissions from all sources. These numbers are the product of the emission factor and the input data. Some sources have no formulas because they have no CO2 emissions, but are included to keep formatting consistent.
	MODULE	Summary
	WORKSHEET	CH4
	UNIVERSITY	Austin College
		--- Scope 1 Emissions Sources ---
		On-Campus Stationary Sources																														Direct Transportation Sources										Refrigerants & Chemicals						Agriculture Sources
	Fiscal Year	On-Campus Cogeneration Plant(s)															Other On-Campus Stationary Sources															University Fleet										Refrigerants & Chemicals						Fertilizer
		Residual Oil (#5-6)	Distillate Oil (#1-4)	Natural Gas	LPG (Propane)	Coal (Steam Coal)	Incinerated Waste	Wood Chips	Wood Pellets	Grass Pellets	Residual BioHeat	Distillate BioHeat	Attributable Solar - Electric	Attributable Solar - Thermal	Attributable Wind	Other	Residual Oil (#5-6)	Distillate Oil (#1-4)	Natural Gas	LPG (Propane)	Coal (Steam Coal)	Incinerated Waste	Wood Chips	Wood Pellets	Grass Pellets	Residual BioHeat	Distillate BioHeat	Attributable Solar - Electric	Attributable Solar - Thermal	Attributable Wind	Other	Gasoline Fleet	Diesel Fleet	Natural Gas Fleet	E85 Fleet	B5 Fleet	B20 Fleet	B100	Hydrogen	Other Fleet Fuel	Electric Fleet	HFC-134a	HFC-404a	HCFC-22	HFC - 410a	HG-10	Other	Synthetic	Organic
		kg CH4	kg CH4	kg CH4	kg CH4	kg CH4	kg CH4	kg CH4	kg CH4	kg CH4	kg CH4	kg CH4	kWh	MMBtu	kWh	kg CH4	kg CH4	kg CH4	kg CH4	kg CH4	kg CH4	kg CH4	kg CH4	kg CH4	kg CH4	kg CH4	kg CH4	kWh	MMBtu	kWh	kg CH4	kg CH4	kg CH4	kg CH4	kg CH4	kg CH4	kg CH4	kg CH4	kg CH4	kg CH4	kg CH4	kg CH4	kg CH4	kg CH4	kg CH4	kg CH4	kg CH4	kg CH4	kg CH4
	1990	0	0	0	0	0	0	0	0	0	0	0				0	0	0	0	0	0	0	0	0	0	0	0				0	0	0	0	0	0	0	0	0	0	0
	1991	0	0	0	0	0	0	0	0	0	0	0				0	0	0	0	0	0	0	0	0	0	0	0				0	0	0	0	0	0	0	0	0	0	0
	1992	0	0	0	0	0	0	0	0	0	0	0				0	0	0	0	0	0	0	0	0	0	0	0				0	0	0	0	0	0	0	0	0	0	0
	1993	0	0	0	0	0	0	0	0	0	0	0				0	0	0	0	0	0	0	0	0	0	0	0				0	0	0	0	0	0	0	0	0	0	0
	1994	0	0	0	0	0	0	0	0	0	0	0				0	0	0	0	0	0	0	0	0	0	0	0				0	0	0	0	0	0	0	0	0	0	0
	1995	0	0	0	0	0	0	0	0	0	0	0				0	0	0	0	0	0	0	0	0	0	0	0				0	0	0	0	0	0	0	0	0	0	0
	1996	0	0	0	0	0	0	0	0	0	0	0				0	0	0	0	0	0	0	0	0	0	0	0				0	0	0	0	0	0	0	0	0	0	0
	1997	0	0	0	0	0	0	0	0	0	0	0				0	0	0	0	0	0	0	0	0	0	0	0				0	0	0	0	0	0	0	0	0	0	0
	1998	0	0	0	0	0	0	0	0	0	0	0				0	0	0	0	0	0	0	0	0	0	0	0				0	0	0	0	0	0	0	0	0	0	0
	1999	0	0	0	0	0	0	0	0	0	0	0				0	0	0	0	0	0	0	0	0	0	0	0				0	0	0	0	0	0	0	0	0	0	0
	2000	0	0	0	0	0	0	0	0	0	0	0				0	0	0	0	0	0	0	0	0	0	0	0				0	0	0	0	0	0	0	0	0	0	0
	2001	0	0	0	0	0	0	0	0	0	0	0				0	0	0	0	0	0	0	0	0	0	0	0				0	0	0	0	0	0	0	0	0	0	0
	2002	0	0	0	0	0	0	0	0	0	0	0				0	0	0	0	0	0	0	0	0	0	0	0				0	0	0	0	0	0	0	0	0	0	0
	2003	0	0	0	0	0	0	0	0	0	0	0				0	0	0	0	0	0	0	0	0	0	0	0				0	0	0	0	0	0	0	0	0	0	0
	2004	0	0	0	0	0	0	0	0	0	0	0				0	0	0	0	0	0	0	0	0	0	0	0				0	0	0	0	0	0	0	0	0	0	0
	2005	0	0	0	0	0	0	0	0	0	0	0				0	0	0	0	0	0	0	0	0	0	0	0				0	0	0	0	0	0	0	0	0	0	0
	2006	0	0	0	0	0	0	0	0	0	0	0				0	0	0	0	0	0	0	0	0	0	0	0				0	0	0	0	0	0	0	0	0	0	0
	2007	0	0	0	0	0	0	0	0	0	0	0				0	0	0	0	0	0	0	0	0	0	0	0				0	0	0	0	0	0	0	0	0	0	0
	2008	0	0	0	0	0	0	0	0	0	0	0				0	0	0	0	0	0	0	0	0	0	0	0				0	0	0	0	0	0	0	0	0	0	0
	2009	0	0	0	0	0	0	0	0	0	0	0				0	0	0	0	0	0	0	0	0	0	0	0				0	0	0	0	0	0	0	0	0	0	0
	2010	0	0	0	0	0	0	0	0	0	0	0				0	0	0	0	0	0	0	0	0	0	0	0				0	0	0	0	0	0	0	0	0	0	0
	2011	0	0	0	0	0	0	0	0	0	0	0				0	0	0	0	0	0	0	0	0	0	0	0				0	0	0	0	0	0	0	0	0	0	0
	2012	0	0	0	0	0	0	0	0	0	0	0				0	0	0	239.374	0	0	0	0	0	0	0	0				0	18.6557	0.652617	0	0	0	0	0	0	0	0
	2013	0	0	0	0	0	0	0	0	0	0	0				0	0	0	290.093	0	0	0	0	0	0	0	0				0	18.6557	0.652617	0	0	0	0	0	0	0	0
	2014	0	0	0	0	0	0	0	0	0	0	0				0	0	0	340.812	0	0	0	0	0	0	0	0				0	18.6557	0.652617	0	0	0	0	0	0	0	0
	2015	0	0	0	0	0	0	0	0	0	0	0				0	0	0	391.532	0	0	0	0	0	0	0	0				0	18.6557	0.652617	0	0	0	0	0	0	0	0
	2016	0	0	0	0	0	0	0	0	0	0	0				0	0	0	442.251	0	0	0	0	0	0	0	0				0	18.6557	0.652617	0	0	0	0	0	0	0	0
	2017	0	0	0	0	0	0	0	0	0	0	0				0	0	0	492.97	0	0	0	0	0	0	0	0				0	18.6557	0.652617	0	0	0	0	0	0	0	0
	2018	0	0	0	0	0	0	0	0	0	0	0				0	0	0	543.689	0	0	0	0	0	0	0	0				0	18.6557	0.652617	0	0	0	0	0	0	0	0
	2019	0	0	0	0	0	0	0	0	0	0	0				0	0	0	594.408	0	0	0	0	0	0	0	0				0	18.6557	0.652617	0	0	0	0	0	0	0	0
	2020	0	0	0	0	0	0	0	0	0	0	0				0	0	0	645.127	0	0	0	0	0	0	0	0				0	18.6557	0.652617	0	0	0	0	0	0	0	0
	2021	0	0	0	0	0	0	0	0	0	0	0				0	0	0	695.846	0	0	0	0	0	0	0	0				0	18.6557	0.652617	0	0	0	0	0	0	0	0
	2022	0	0	0	0	0	0	0	0	0	0	0				0	0	0	746.565	0	0	0	0	0	0	0	0				0	18.6557	0.652617	0	0	0	0	0	0	0	0
	2023	0	0	0	0	0	0	0	0	0	0	0				0	0	0	797.285	0	0	0	0	0	0	0	0				0	18.6557	0.652617	0	0	0	0	0	0	0	0
	2024	0	0	0	0	0	0	0	0	0	0	0				0	0	0	848.004	0	0	0	0	0	0	0	0				0	18.6557	0.652617	0	0	0	0	0	0	0	0
	2025	0	0	0	0	0	0	0	0	0	0	0				0	0	0	898.723	0	0	0	0	0	0	0	0				0	18.6557	0.652617	0	0	0	0	0	0	0	0
	2026	0	0	0	0	0	0	0	0	0	0	0				0	0	0	949.442	0	0	0	0	0	0	0	0				0	18.6557	0.652617	0	0	0	0	0	0	0	0
	2027	0	0	0	0	0	0	0	0	0	0	0				0	0	0	1000.16	0	0	0	0	0	0	0	0				0	18.6557	0.652617	0	0	0	0	0	0	0	0
	2028	0	0	0	0	0	0	0	0	0	0	0				0	0	0	1050.88	0	0	0	0	0	0	0	0				0	18.6557	0.652617	0	0	0	0	0	0	0	0
	2029	0	0	0	0	0	0	0	0	0	0	0				0	0	0	1101.6	0	0	0	0	0	0	0	0				0	18.6557	0.652617	0	0	0	0	0	0	0	0
	2030	0	0	0	0	0	0	0	0	0	0	0				0	0	0	1152.32	0	0	0	0	0	0	0	0				0	18.6557	0.652617	0	0	0	0	0	0	0	0
	2031	0	0	0	0	0	0	0	0	0	0	0				0	0	0	1203.04	0	0	0	0	0	0	0	0				0	18.6557	0.652617	0	0	0	0	0	0	0	0
	2032	0	0	0	0	0	0	0	0	0	0	0				0	0	0	1253.76	0	0	0	0	0	0	0	0				0	18.6557	0.652617	0	0	0	0	0	0	0	0
	2033	0	0	0	0	0	0	0	0	0	0	0				0	0	0	1304.48	0	0	0	0	0	0	0	0				0	18.6557	0.652617	0	0	0	0	0	0	0	0
	2034	0	0	0	0	0	0	0	0	0	0	0				0	0	0	1355.19	0	0	0	0	0	0	0	0				0	18.6557	0.652617	0	0	0	0	0	0	0	0
	2035	0	0	0	0	0	0	0	0	0	0	0				0	0	0	1405.91	0	0	0	0	0	0	0	0				0	18.6557	0.652617	0	0	0	0	0	0	0	0
	2036	0	0	0	0	0	0	0	0	0	0	0				0	0	0	1456.63	0	0	0	0	0	0	0	0				0	18.6557	0.652617	0	0	0	0	0	0	0	0
	2037	0	0	0	0	0	0	0	0	0	0	0				0	0	0	1507.35	0	0	0	0	0	0	0	0				0	18.6557	0.652617	0	0	0	0	0	0	0	0
	2038	0	0	0	0	0	0	0	0	0	0	0				0	0	0	1558.07	0	0	0	0	0	0	0	0				0	18.6557	0.652617	0	0	0	0	0	0	0	0
	2039	0	0	0	0	0	0	0	0	0	0	0				0	0	0	1608.79	0	0	0	0	0	0	0	0				0	18.6557	0.652617	0	0	0	0	0	0	0	0
	2040	0	0	0	0	0	0	0	0	0	0	0				0	0	0	1659.51	0	0	0	0	0	0	0	0				0	18.6557	0.652617	0	0	0	0	0	0	0	0
	2041	0	0	0	0	0	0	0	0	0	0	0				0	0	0	1710.23	0	0	0	0	0	0	0	0				0	18.6557	0.652617	0	0	0	0	0	0	0	0
	2042	0	0	0	0	0	0	0	0	0	0	0				0	0	0	1760.95	0	0	0	0	0	0	0	0				0	18.6557	0.652617	0	0	0	0	0	0	0	0
	2043	0	0	0	0	0	0	0	0	0	0	0				0	0	0	1811.67	0	0	0	0	0	0	0	0				0	18.6557	0.652617	0	0	0	0	0	0	0	0
	2044	0	0	0	0	0	0	0	0	0	0	0				0	0	0	1862.39	0	0	0	0	0	0	0	0				0	18.6557	0.652617	0	0	0	0	0	0	0	0
	2045	0	0	0	0	0	0	0	0	0	0	0				0	0	0	1913.11	0	0	0	0	0	0	0	0				0	18.6557	0.652617	0	0	0	0	0	0	0	0
	2046	0	0	0	0	0	0	0	0	0	0	0				0	0	0	1963.82	0	0	0	0	0	0	0	0				0	18.6557	0.652617	0	0	0	0	0	0	0	0
	2047	0	0	0	0	0	0	0	0	0	0	0				0	0	0	2014.54	0	0	0	0	0	0	0	0				0	18.6557	0.652617	0	0	0	0	0	0	0	0
	2048	0	0	0	0	0	0	0	0	0	0	0				0	0	0	2065.26	0	0	0	0	0	0	0	0				0	18.6557	0.652617	0	0	0	0	0	0	0	0
	2049	0	0	0	0	0	0	0	0	0	0	0				0	0	0	2115.98	0	0	0	0	0	0	0	0				0	18.6557	0.652617	0	0	0	0	0	0	0	0
	2050	0	0	0	0	0	0	0	0	0	0	0				0	0	0	2166.7	0	0	0	0	0	0	0	0				0	18.6557	0.652617	0	0	0	0	0	0	0	0
	2051	0	0	0	0	0	0	0	0	0	0	0				0	0	0	2217.42	0	0	0	0	0	0	0	0				0	18.6557	0.652617	0	0	0	0	0	0	0	0
	2052	0	0	0	0	0	0	0	0	0	0	0				0	0	0	2268.14	0	0	0	0	0	0	0	0				0	18.6557	0.652617	0	0	0	0	0	0	0	0
	2053	0	0	0	0	0	0	0	0	0	0	0				0	0	0	2318.86	0	0	0	0	0	0	0	0				0	18.6557	0.652617	0	0	0	0	0	0	0	0
	2054	0	0	0	0	0	0	0	0	0	0	0				0	0	0	2369.58	0	0	0	0	0	0	0	0				0	18.6557	0.652617	0	0	0	0	0	0	0	0
	2055	0	0	0	0	0	0	0	0	0	0	0				0	0	0	2420.3	0	0	0	0	0	0	0	0				0	18.6557	0.652617	0	0	0	0	0	0	0	0
	2056	0	0	0	0	0	0	0	0	0	0	0				0	0	0	2471.02	0	0	0	0	0	0	0	0				0	18.6557	0.652617	0	0	0	0	0	0	0	0
	2057	0	0	0	0	0	0	0	0	0	0	0				0	0	0	2521.73	0	0	0	0	0	0	0	0				0	18.6557	0.652617	0	0	0	0	0	0	0	0
	2058	0	0	0	0	0	0	0	0	0	0	0				0	0	0	2572.45	0	0	0	0	0	0	0	0				0	18.6557	0.652617	0	0	0	0	0	0	0	0
	2059	0	0	0	0	0	0	0	0	0	0	0				0	0	0	2623.17	0	0	0	0	0	0	0	0				0	18.6557	0.652617	0	0	0	0	0	0	0	0
	2060	0	0	0	0	0	0	0	0	0	0	0				0	0	0	2673.89	0	0	0	0	0	0	0	0				0	18.6557	0.652617	0	0	0	0	0	0	0	0
	©2001-2009 Clean Air-Cool Planet, Inc. All rights reserved
[truncated: 58 more columns]

## Sheet: S_N2O
	On this Worksheet: N2O emissions from all sources. These numbers are the product of the emission factor and the input data. Some sources have no formulas because they have no CO2 emissions, but are included to keep formatting consistent.
	MODULE	Summary
	WORKSHEET	N2O
	UNIVERSITY	Austin College
		--- Scope 1 Emissions Sources ---
		On-Campus Stationary Sources																														Direct Transportation Sources										Refrigerants & Chemicals						Agriculture Sources
	Fiscal Year	On-Campus Cogeneration Plant(s)															Other On-Campus Stationary Sources															University Fleet										Refrigerants & Chemicals						Fertilizer
		Residual Oil (#5-6)	Distillate Oil (#1-4)	Natural Gas	LPG (Propane)	Coal (Steam Coal)	Incinerated Waste	Wood Chips	Wood Pellets	Grass Pellets	Residual BioHeat	Distillate BioHeat	Attributable Solar - Electric	Attributable Solar - Thermal	Attributable Wind	Other	Residual Oil (#5-6)	Distillate Oil (#1-4)	Natural Gas	LPG (Propane)	Coal (Steam Coal)	Incinerated Waste	Wood Chips	Wood Pellets	Grass Pellets	Residual BioHeat	Distillate BioHeat	Attributable Solar - Electric	Attributable Solar - Thermal	Attributable Wind	Other	Gasoline Fleet	Diesel Fleet	Natural Gas Fleet	E85 Fleet	B5 Fleet	B20 Fleet	B100	Hydrogen	Other Fleet Fuel	Electric Fleet	HFC-134a	HFC-404a	HCFC-22	HFC - 410a	HG-10	Other	Synthetic	Organic
		kg N2O	kg N2O	kg N2O	kg N2O	kg N2O	kg N2O	kg N2O	kg N2O	kg N2O	kg N2O	kg N2O	kWh	MMBtu	kWh	kg N2O	kg N2O	kg N2O	kg N2O	kg N2O	kg N2O	kg N2O	kg N2O	kg N2O	kg N2O	kg N2O	kg N2O	kWh	MMBtu	kWh	kg N2O	kg N2O	kg N2O	kg N2O	kg N2O	kg N2O	kg N2O	kg N2O	kg N2O	kg N2O	kg N2O	kg N2O	kg N2O	kg N2O	kg N2O	kg N2O	kg N2O	kg N2O	kg N2O
	1990	0	0	0	0	0	0	0	0	0	0	0				0	0	0	0	0	0	0	0	0	0	0	0				0	0	0	0	0	0	0	0	0	0	0							0	0
	1991	0	0	0	0	0	0	0	0	0	0	0				0	0	0	0	0	0	0	0	0	0	0	0				0	0	0	0	0	0	0	0	0	0	0							0	0
	1992	0	0	0	0	0	0	0	0	0	0	0				0	0	0	0	0	0	0	0	0	0	0	0				0	0	0	0	0	0	0	0	0	0	0							0	0
	1993	0	0	0	0	0	0	0	0	0	0	0				0	0	0	0	0	0	0	0	0	0	0	0				0	0	0	0	0	0	0	0	0	0	0							0	0
	1994	0	0	0	0	0	0	0	0	0	0	0				0	0	0	0	0	0	0	0	0	0	0	0				0	0	0	0	0	0	0	0	0	0	0							0	0
	1995	0	0	0	0	0	0	0	0	0	0	0				0	0	0	0	0	0	0	0	0	0	0	0				0	0	0	0	0	0	0	0	0	0	0							0	0
	1996	0	0	0	0	0	0	0	0	0	0	0				0	0	0	0	0	0	0	0	0	0	0	0				0	0	0	0	0	0	0	0	0	0	0							0	0
	1997	0	0	0	0	0	0	0	0	0	0	0				0	0	0	0	0	0	0	0	0	0	0	0				0	0	0	0	0	0	0	0	0	0	0							0	0
	1998	0	0	0	0	0	0	0	0	0	0	0				0	0	0	0	0	0	0	0	0	0	0	0				0	0	0	0	0	0	0	0	0	0	0							0	0
	1999	0	0	0	0	0	0	0	0	0	0	0				0	0	0	0	0	0	0	0	0	0	0	0				0	0	0	0	0	0	0	0	0	0	0							0	0
	2000	0	0	0	0	0	0	0	0	0	0	0				0	0	0	0	0	0	0	0	0	0	0	0				0	0	0	0	0	0	0	0	0	0	0							0	0
	2001	0	0	0	0	0	0	0	0	0	0	0				0	0	0	0	0	0	0	0	0	0	0	0				0	0	0	0	0	0	0	0	0	0	0							0	0
	2002	0	0	0	0	0	0	0	0	0	0	0				0	0	0	0	0	0	0	0	0	0	0	0				0	0	0	0	0	0	0	0	0	0	0							0	0
	2003	0	0	0	0	0	0	0	0	0	0	0				0	0	0	0	0	0	0	0	0	0	0	0				0	0	0	0	0	0	0	0	0	0	0							0	0
	2004	0	0	0	0	0	0	0	0	0	0	0				0	0	0	0	0	0	0	0	0	0	0	0				0	0	0	0	0	0	0	0	0	0	0							0	0
	2005	0	0	0	0	0	0	0	0	0	0	0				0	0	0	0	0	0	0	0	0	0	0	0				0	0	0	0	0	0	0	0	0	0	0							0	0
	2006	0	0	0	0	0	0	0	0	0	0	0				0	0	0	0	0	0	0	0	0	0	0	0				0	0	0	0	0	0	0	0	0	0	0							0	0
	2007	0	0	0	0	0	0	0	0	0	0	0				0	0	0	0	0	0	0	0	0	0	0	0				0	0	0	0	0	0	0	0	0	0	0							0	0
	2008	0	0	0	0	0	0	0	0	0	0	0				0	0	0	0	0	0	0	0	0	0	0	0				0	0	0	0	0	0	0	0	0	0	0							0	0
	2009	0	0	0	0	0	0	0	0	0	0	0				0	0	0	0	0	0	0	0	0	0	0	0				0	0	0	0	0	0	0	0	0	0	0							0	0
	2010	0	0	0	0	0	0	0	0	0	0	0				0	0	0	0	0	0	0	0	0	0	0	0				0	0	0	0	0	0	0	0	0	0	0							0	0
	2011	0	0	0	0	0	0	0	0	0	0	0				0	0	0	0	0	0	0	0	0	0	0	0				0	0	0	0	0	0	0	0	0	0	0							0	0
	2012	0	0	0	0	0	0	0	0	0	0	0				0	0	0	4.78748	0	0	0	0	0	0	0	0				0	6.2388	0.295807	0	0	0	0	0	0	0	0							45.21	0
	2013	0	0	0	0	0	0	0	0	0	0	0				0	0	0	5.80187	0	0	0	0	0	0	0	0				0	6.2388	0.295807	0	0	0	0	0	0	0	0							48.5292	0
	2014	0	0	0	0	0	0	0	0	0	0	0				0	0	0	6.81625	0	0	0	0	0	0	0	0				0	6.2388	0.295807	0	0	0	0	0	0	0	0							51.7641	0
	2015	0	0	0	0	0	0	0	0	0	0	0				0	0	0	7.83063	0	0	0	0	0	0	0	0				0	6.2388	0.295807	0	0	0	0	0	0	0	0							54.9148	0
	2016	0	0	0	0	0	0	0	0	0	0	0				0	0	0	8.84501	0	0	0	0	0	0	0	0				0	6.2388	0.295807	0	0	0	0	0	0	0	0							57.9812	0
	2017	0	0	0	0	0	0	0	0	0	0	0				0	0	0	9.8594	0	0	0	0	0	0	0	0				0	6.2388	0.295807	0	0	0	0	0	0	0	0							60.9635	0
	2018	0	0	0	0	0	0	0	0	0	0	0				0	0	0	10.8738	0	0	0	0	0	0	0	0				0	6.2388	0.295807	0	0	0	0	0	0	0	0							63.8615	0
	2019	0	0	0	0	0	0	0	0	0	0	0				0	0	0	11.8882	0	0	0	0	0	0	0	0				0	6.2388	0.295807	0	0	0	0	0	0	0	0							66.6753	0
	2020	0	0	0	0	0	0	0	0	0	0	0				0	0	0	12.9025	0	0	0	0	0	0	0	0				0	6.2388	0.295807	0	0	0	0	0	0	0	0							69.4049	0
	2021	0	0	0	0	0	0	0	0	0	0	0				0	0	0	13.9169	0	0	0	0	0	0	0	0				0	6.2388	0.295807	0	0	0	0	0	0	0	0							72.0502	0
	2022	0	0	0	0	0	0	0	0	0	0	0				0	0	0	14.9313	0	0	0	0	0	0	0	0				0	6.2388	0.295807	0	0	0	0	0	0	0	0							74.6114	0
	2023	0	0	0	0	0	0	0	0	0	0	0				0	0	0	15.9457	0	0	0	0	0	0	0	0				0	6.2388	0.295807	0	0	0	0	0	0	0	0							77.0883	0
	2024	0	0	0	0	0	0	0	0	0	0	0				0	0	0	16.9601	0	0	0	0	0	0	0	0				0	6.2388	0.295807	0	0	0	0	0	0	0	0							79.4809	0
	2025	0	0	0	0	0	0	0	0	0	0	0				0	0	0	17.9745	0	0	0	0	0	0	0	0				0	6.2388	0.295807	0	0	0	0	0	0	0	0							81.7894	0
	2026	0	0	0	0	0	0	0	0	0	0	0				0	0	0	18.9888	0	0	0	0	0	0	0	0				0	6.2388	0.295807	0	0	0	0	0	0	0	0							84.0136	0
	2027	0	0	0	0	0	0	0	0	0	0	0				0	0	0	20.0032	0	0	0	0	0	0	0	0				0	6.2388	0.295807	0	0	0	0	0	0	0	0							86.1536	0
	2028	0	0	0	0	0	0	0	0	0	0	0				0	0	0	21.0176	0	0	0	0	0	0	0	0				0	6.2388	0.295807	0	0	0	0	0	0	0	0							88.2094	0
	2029	0	0	0	0	0	0	0	0	0	0	0				0	0	0	22.032	0	0	0	0	0	0	0	0				0	6.2388	0.295807	0	0	0	0	0	0	0	0							90.181	0
	2030	0	0	0	0	0	0	0	0	0	0	0				0	0	0	23.0464	0	0	0	0	0	0	0	0				0	6.2388	0.295807	0	0	0	0	0	0	0	0							92.0683	0
	2031	0	0	0	0	0	0	0	0	0	0	0				0	0	0	24.0608	0	0	0	0	0	0	0	0				0	6.2388	0.295807	0	0	0	0	0	0	0	0							93.8714	0
	2032	0	0	0	0	0	0	0	0	0	0	0				0	0	0	25.0751	0	0	0	0	0	0	0	0				0	6.2388	0.295807	0	0	0	0	0	0	0	0							95.5903	0
	2033	0	0	0	0	0	0	0	0	0	0	0				0	0	0	26.0895	0	0	0	0	0	0	0	0				0	6.2388	0.295807	0	0	0	0	0	0	0	0							97.225	0
	2034	0	0	0	0	0	0	0	0	0	0	0				0	0	0	27.1039	0	0	0	0	0	0	0	0				0	6.2388	0.295807	0	0	0	0	0	0	0	0							98.7754	0
	2035	0	0	0	0	0	0	0	0	0	0	0				0	0	0	28.1183	0	0	0	0	0	0	0	0				0	6.2388	0.295807	0	0	0	0	0	0	0	0							100.242	0
	2036	0	0	0	0	0	0	0	0	0	0	0				0	0	0	29.1327	0	0	0	0	0	0	0	0				0	6.2388	0.295807	0	0	0	0	0	0	0	0							101.624	0
	2037	0	0	0	0	0	0	0	0	0	0	0				0	0	0	30.147	0	0	0	0	0	0	0	0				0	6.2388	0.295807	0	0	0	0	0	0	0	0							102.921	0
	2038	0	0	0	0	0	0	0	0	0	0	0				0	0	0	31.1614	0	0	0	0	0	0	0	0				0	6.2388	0.295807	0	0	0	0	0	0	0	0							104.135	0
	2039	0	0	0	0	0	0	0	0	0	0	0				0	0	0	32.1758	0	0	0	0	0	0	0	0				0	6.2388	0.295807	0	0	0	0	0	0	0	0							105.264	0
	2040	0	0	0	0	0	0	0	0	0	0	0				0	0	0	33.1902	0	0	0	0	0	0	0	0				0	6.2388	0.295807	0	0	0	0	0	0	0	0							106.309	0
	2041	0	0	0	0	0	0	0	0	0	0	0				0	0	0	34.2046	0	0	0	0	0	0	0	0				0	6.2388	0.295807	0	0	0	0	0	0	0	0							107.27	0
	2042	0	0	0	0	0	0	0	0	0	0	0				0	0	0	35.219	0	0	0	0	0	0	0	0				0	6.2388	0.295807	0	0	0	0	0	0	0	0							108.147	0
	2043	0	0	0	0	0	0	0	0	0	0	0				0	0	0	36.2333	0	0	0	0	0	0	0	0				0	6.2388	0.295807	0	0	0	0	0	0	0	0							108.939	0
	2044	0	0	0	0	0	0	0	0	0	0	0				0	0	0	37.2477	0	0	0	0	0	0	0	0				0	6.2388	0.295807	0	0	0	0	0	0	0	0							109.647	0
	2045	0	0	0	0	0	0	0	0	0	0	0				0	0	0	38.2621	0	0	0	0	0	0	0	0				0	6.2388	0.295807	0	0	0	0	0	0	0	0							110.271	0
	2046	0	0	0	0	0	0	0	0	0	0	0				0	0	0	39.2765	0	0	0	0	0	0	0	0				0	6.2388	0.295807	0	0	0	0	0	0	0	0							110.811	0
	2047	0	0	0	0	0	0	0	0	0	0	0				0	0	0	40.2909	0	0	0	0	0	0	0	0				0	6.2388	0.295807	0	0	0	0	0	0	0	0							111.267	0
	2048	0	0	0	0	0	0	0	0	0	0	0				0	0	0	41.3053	0	0	0	0	0	0	0	0				0	6.2388	0.295807	0	0	0	0	0	0	0	0							111.638	0
	2049	0	0	0	0	0	0	0	0	0	0	0				0	0	0	42.3196	0	0	0	0	0	0	0	0				0	6.2388	0.295807	0	0	0	0	0	0	0	0							111.925	0
	2050	0	0	0	0	0	0	0	0	0	0	0				0	0	0	43.334	0	0	0	0	0	0	0	0				0	6.2388	0.295807	0	0	0	0	0	0	0	0							112.128	0
	2051	0	0	0	0	0	0	0	0	0	0	0				0	0	0	44.3484	0	0	0	0	0	0	0	0				0	6.2388	0.295807	0	0	0	0	0	0	0	0							112.246	0
	2052	0	0	0	0	0	0	0	0	0	0	0				0	0	0	45.3628	0	0	0	0	0	0	0	0				0	6.2388	0.295807	0	0	0	0	0	0	0	0							112.281	0
	2053	0	0	0	0	0	0	0	0	0	0	0				0	0	0	46.3772	0	0	0	0	0	0	0	0				0	6.2388	0.295807	0	0	0	0	0	0	0	0							112.231	0
	2054	0	0	0	0	0	0	0	0	0	0	0				0	0	0	47.3915	0	0	0	0	0	0	0	0				0	6.2388	0.295807	0	0	0	0	0	0	0	0							112.097	0
	2055	0	0	0	0	0	0	0	0	0	0	0				0	0	0	48.4059	0	0	0	0	0	0	0	0				0	6.2388	0.295807	0	0	0	0	0	0	0	0							111.879	0
	2056	0	0	0	0	0	0	0	0	0	0	0				0	0	0	49.4203	0	0	0	0	0	0	0	0				0	6.2388	0.295807	0	0	0	0	0	0	0	0							111.576	0
	2057	0	0	0	0	0	0	0	0	0	0	0				0	0	0	50.4347	0	0	0	0	0	0	0	0				0	6.2388	0.295807	0	0	0	0	0	0	0	0							111.19	0
	2058	0	0	0	0	0	0	0	0	0	0	0				0	0	0	51.4491	0	0	0	0	0	0	0	0				0	6.2388	0.295807	0	0	0	0	0	0	0	0							110.719	0
	2059	0	0	0	0	0	0	0	0	0	0	0				0	0	0	52.4635	0	0	0	0	0	0	0	0				0	6.2388	0.295807	0	0	0	0	0	0	0	0							110.163	0
	2060	0	0	0	0	0	0	0	0	0	0	0				0	0	0	53.4778	0	0	0	0	0	0	0	0				0	6.2388	0.295807	0	0	0	0	0	0	0	0							109.524	0
	©2001-2009 Clean Air-Cool Planet, Inc. All rights reserved
[truncated: 58 more columns]

[truncated: 96 more sheets: S_Energy, S_CO2_Sum, S_CH4_Sum, S_N2O_Sum, S_Energy_Sum, S_eCO2_Sum, S_Annual, S_Demo, ACUPCC_Reporting, GraphControl, Linear Projection, Normalization, Customized trends, Detailed Projection, Project_Input, P_Cost_Ass, Project_EF, P_Emissions_Calc, P_Source_Increases, P_Source_Reductions …]
