# Supplementary material
Source: MDPI journal article supplement (https://www.mdpi.com/2071-1050/8/1/80)
Supplement: s1 [file s1 › CACP Excel template - UNT.xlsm]

## Sheet: User_Agreement
	v6.9
	©2001-2010 Clean Air-Cool Planet, Inc. All rights reserved
	Clean Air-Cool Planet, Campus Carbon Calculator, and the Clean Air-Cool Planet logo are trademarks of Clean Air-Cool Planet, Inc.
	USERS' AGREEMENT
	By using Clean Air-Cool Planet’s Campus Carbon Calculator, you are agreeing to specific terms and conditions:
	1. The Campus Carbon Calculator is designed to help campus staff, faculty, students and administrators document, understand, project, and reduce the campus greenhouse gas footprint. The Calculator can help a campus in taking the first steps toward a comprehensive Climate Action or Climate Neutrality Plan. Organizations or entities wishing to use the Calculator for other purposes should contact CA…
	2. When presenting the results of your campus greenhouse gas inventory, whether in written reports or spoken presentations, please credit the “Clean Air-Cool Planet Campus Carbon Calculator” as a tool you used to complete this task.
	3. Many campuses want to share the results of the inventory with their constituents and the general public once they’ve completed it. Whether or not you are making your inventory public, download and use of the Calculator implies willingness to share results of the inventory with CA-CP, only for purposes of aggregating U.S. campus inventory results. Results are expected to be shared upon completi…
	4. CA-CP will not be responsible for verifying your results from the Campus Carbon Calculator, and assumes no liability for your inventory results, or their use on your campus.
	I UNDERSTAND AND AM WILLING TO ABIDE BY THESE TERMS. I WISH TO PROCEED.
	Originally developed by Adam Wilson as a collaborative project between the University of New Hampshire's Office of Sustainability and Clean Air-Cool Planet in 2001. Version 4.0 was updated to version 5.0 by Jordan Macy and Jennifer Schroeder in '05-'06. Version 5.0 was updated to version 6.0 by Claire Roby, Ian Hough, Jason Kowalski, Lisa Weil, Tai Young Taft, and Jennifer (Schroeder) Andrews in …
	Acknowledgments:
	CA-CP would first like to extend gratitude and acknowledgement to one of our first, and best, partners - the University of New Hampshire. Their integral role in the creation of this tool is a great example of the power schools have to help accelerate the pace of change by solving problems on their own campuses while being mindful of the potential for creating models to light the way for others. T…
	The planning elements of the tool were inspired by the good work of students at Middlebury College (MiddShift), University of California Santa Barbara (NAELS Climate Neutral project), and the efforts of Duke University as presented by then-Sustainability Coordinator Sam Hummel in his "Charting a Path to Greenhouse Gas Reductions" paper at the Ball State Greening of the Campus conference in 2005. …
	CA-CP would also like to extend sincere thanks for the invaluable review, assistance and/or collaboration offered over the years by the following individuals and organizations: Julian Dautremont-Smith of the Association for the Advancement of Sustainability in Higher Education (AASHE); the team over at the World Resources Institute, including Jennifer Layke, Samantha Putt del Pino, Ryan Levinson …

## Sheet: Introduction
©2001-2012 Clean Air-Cool Planet, Inc. All Rights Reserved
	Clean Air-Cool Planet, Campus Carbon Calculator, and the Clean Air-Cool Planet logo are trademarks of Clean Air-Cool Planet, Inc.
					www.cleanair-coolplanet.org
					University
					Contact Name			Note: v6.85 can automatically transfer your data from previous v6 files. Scroll down for instructions
					Title
					Organization
					State
					Phone
					Fax
					E-Mail
					Getting Started
					Navigating the Calculator
					Background Information
					Color Coding
					Using the Calculator
					Updating from Previous Calculator Files
												Use these buttons if your old file has an .xls file extension (older version of Excel)
												Use these buttons if your old file has an .xlsx file extension (newer version of Excel)
												Use these buttons if your old file has an .xls file extension (older version of Excel)
												Use these buttons if your old file has an .xlsx file extension (newer version of Excel)

## Sheet: Spreadsheet_Map
©2001-2012 Clean Air-Cool Planet, Inc. All rights reserved.
Clean Air-Cool Planet, Campus Carbon Calculator, and the Clean Air-Cool Planet logo are trademarks of Clean Air-Cool Planet, Inc.
				INPUTS			EMISSIONS FACTORS					CALCULATIONS						RESULTS					GRAPHS
	REFERENCE MODULE

## Sheet: Input
		On this Worksheet: Enter data related to emissions. If a column does not apply or the data is unavailable, leave it blank.
		MODULE	Input
		WORKSHEET	Input: Enter emissions source activity and institutional data
		UNIVERSITY	Please enter university name on 'Introduction' sheet
													--- Scope 1 Emissions Sources ---
			Institutional Data										On-Campus Stationary Sources																																		Direct Transportation Sources
		Fiscal Year	Budget - Click here to enter data			Population					Physical Size		On-Campus Cogeneration Plant(s)																			Other On-Campus Stationary Sources															University Fleet
			Operating Budget	Research Budget	Energy Budget	Full Time Students	Part-Time Students	Summer School Students	Faculty	Staff	Total Building Space	Total Research Building Space	Residual Oil (#5-6)	Distillate Oil (#1-4)	Natural Gas	LPG (Propane)	Coal (Steam Coal)	Incinerated Waste	Wood Chips	Wood Pellets	Grass Pellets	Residual BioHeat	Distillate BioHeat	Attributable Solar - Electric	Attributable Solar - Thermal	Attributable Wind	Other	Electric Output	Steam Output	Electric Efficiency	Steam Efficiency	Residual Oil (#5-6)	Distillate Oil (#1-4)	Natural Gas	LPG (Propane)	Coal (Steam Coal)	Incinerated Waste	Wood Chips	Wood Pellets	Grass Pellets	Residual BioHeat	Distillate BioHeat	Attributable Solar - Electric	Attributable Solar - Thermal	Attributable Wind	Other	Gasoline Fleet	Diesel Fleet	Natural Gas Fleet
			$ (2005)	$ (2005)	$ (2005)	#	#	#	#	#	Square feet	Square feet	Gallons	Gallons	MMBtu	Gallons	Short Tons	Short Tons	Short Tons	Short Tons	Short Tons	Gallons	Gallons	kWh	MMBtu	kWh	MMBtu	kWh	MMBtu	%	%	Gallons	Gallons	MMBtu	Gallons	Short Tons	Short Tons	Short Tons	Short Tons	Short Tons	Gallons	Gallons	kWh	MMBtu	kWh	MMBtu	Gallons	Gallons	MMBtu
		1990	0	0	0
		1991	0	0	0
		1992	0	0	0
		1993	0	0	0
		1994	0	0	0
		1995	0	0	0
		1996	0	0	0
		1997	0	0	0
		1998	0	0	0
		1999	0	0	0
		2000	0	0	0
		2001	0	0	0
		2002	0	0	0
		2003	0	0	0
		2004	0	0	0
		2005	0	0	0
		2006	0	0	0
		2007	548996	1.27765e+07	0	24012	10141	15480	924	2280	5858318	211672																						171979													105853
		2008	0	0	0
		2009	607013903	3.4224e+07	0	24195	10503	16161	1035	2655	6090970	445413																						167988													117877	47838
		2010	0	0	0
		2011	858616604	18290930	0	25694	10373		1069	2569	6446811	445413																						186292	457												137798	18159.7
		2012	0	0	0																													173511	235.4												144968	7496
		2013	0	0	0	28280			2396	2481	6870000																							173511	235.4										450000		137798	133083
		Note: Signatories of the ACUPCC should reference the Implementation Guide, as they have specified definitions for many data categories. You may gather
			data for the categories that differ in the		ACUPCC Reporting Worksheet.		For guidance reference the		ACUPCC Implementation Guide (pdf).
	©2001-2012 Clean Air-Cool Planet, Inc. All rights reserved
	Clean Air-Cool Planet, Campus Carbon Calculator, and the Clean Air-Cool Planet logo are trademarks of Clean Air-Cool Planet, Inc.
[truncated: 74 more columns]

## Sheet: Input_InflAdj
	On this Worksheet: Original budget values, and values adjusted for inflation
	MODULE	Input
	WORKSHEET	Inflation Adjustment: Enter your budget values in the left-hand columns and they will be adjusted for inflation.
	UNIVERSITY	Please enter university name on 'Introduction' sheet
		Budget			Conversion	Budget Adjusted for Inflation
	Fiscal Year	Operating Budget	Research Dollars	Energy Budget	Deflator	Operating Budget	Research Dollars	Energy Budget
		$	$	$	$ (2005)	$	$	$
	1990				0.722	0	0	0
	1991				0.74726	0	0	0
	1992				0.76444	0	0	0
	1993				0.7821	0	0	0
	1994				0.79872	0	0	0
	1995				0.81506	0	0	0
	1996				0.83051	0	0	0
	1997				0.84433	0	0	0
	1998				0.8537	0	0	0
	1999				0.86605	0	0	0
	2000				0.88492	0	0	0
	2001				0.90615	0	0	0
	2002				0.92197	0	0	0
	2003				0.94159	0	0	0
	2004				0.96833	0	0	0
	2005				1	0	0	0
	2006				1.03153	0	0	0
	2007				1.05887	0	0	0
	2008				1.08105	0	0	0
	2009				1.10057	0	0	0
	2010				1.12153	0	0	0
	2011				1.14197	0	0	0
	2012				1.16329	0	0	0
	2013				1.18417	0	0	0
	2014				1.20462	0	0	0
	2015				1.22491	0	0	0
	2016				1.24577	0	0	0
	2017				1.26744	0	0	0
	2018				1.28932	0	0	0
	2019				1.31211	0	0	0
	2020				1.33541	0	0	0
	2021				1.35953	0	0	0
	2022				1.3855	0	0	0
	2023				1.41322	0	0	0
	2024				1.44201	0	0	0
	2025				1.47204	0	0	0
	2026				1.5028	0	0	0
	2027				1.53356	0	0	0
	2028				1.56401	0	0	0
	2029				1.59483	0	0	0
	2030				1.6261	0	0	0
	2031				1.64834	0	0	0
	2032				1.67059	0	0	0
	2033				1.69283	0	0	0
	2034				1.71508	0	0	0
	2035				1.73732	0	0	0
	2036				1.75956	0	0	0
	2037				1.78181	0	0	0
	2038				1.80405	0	0	0
	2039				1.8263	0	0	0
	2040				1.84854	0	0	0
	2041				1.87078	0	0	0
	2042				1.89303	0	0	0
	2043				1.91527	0	0	0
	2044				1.93752	0	0	0
	2045				1.95976	0	0	0
	2046				1.98201	0	0	0
	2047				2.00425	0	0	0
	2048				2.02649	0	0	0
	2049				2.04874	0	0	0
	2050				2.07098	0	0	0
	2051				2.09323	0	0	0
	2052				2.11547	0	0	0
	2053				2.13771	0	0	0
	2054				2.15996	0	0	0
	2055				2.1822	0	0	0
	2056				2.20445	0	0	0
	2057				2.22669	0	0	0
	2058				2.24893	0	0	0
	2059				2.27118	0	0	0
	2060				2.29342	0	0	0
	Source:				19
	Source 2:				20
				Slope	0.0222441
©2001-2010 Clean Air-Cool Planet, Inc. All rights reserved
Clean Air-Cool Planet, Campus Carbon Calculator, and the Clean Air-Cool Planet logo are trademarks of Clean Air-Cool Planet, Inc.

## Sheet: CustFuelMix
	On this Worksheet: If you know the exact fuel mix of your electric utility, enter it on this sheet.
	MODULE	Input
	WORKSHEET	Custom Fuel Mix
	UNIVERSITY	Please enter university name on 'Introduction' sheet
	Fiscal Year	Total Electricity Purchased	Net Purchased	Coal	Natural Gas	Distillate Oil (#1-#4)	Residual Oil (#5-#6)	Nuclear	Waste to Energy	Hydro-Electric	Biomass	Renewable (wind, solar)	Total Percentage
		(kWh)	(%)	(%)	(%)	(%)	(%)	(%)	(%)	(%)	(%)	(%)	(%)
	1990	0											0
	1991	0											0
	1992	0											0
	1993	0											0
	1994	0											0
	1995	0											0
	1996	0											0
	1997	0											0
	1998	0											0
	1999	0											0
	2000	0											0
	2001	0											0
	2002	0											0
	2003	0											0
	2004	0											0
	2005	0											0
	2006	0											0
	2007	97559649											0
	2008	0											0
	2009	102442604											0
	2010	0											0
	2011	120165936											0
	2012	113410786											0
	2013	113410786											0
	2014	1.20772e+08	0	0	0	0	0	0	0	0	0	0	0
	2015	1.23932e+08	0	0	0	0	0	0	0	0	0	0	0
	2016	1.27092e+08	0	0	0	0	0	0	0	0	0	0	0
	2017	1.30251e+08	0	0	0	0	0	0	0	0	0	0	0
	2018	1.33411e+08	0	0	0	0	0	0	0	0	0	0	0
	2019	1.3657e+08	0	0	0	0	0	0	0	0	0	0	0
	2020	1.3973e+08	0	0	0	0	0	0	0	0	0	0	0
	2021	1.4289e+08	0	0	0	0	0	0	0	0	0	0	0
	2022	1.46049e+08	0	0	0	0	0	0	0	0	0	0	0
	2023	1.49209e+08	0	0	0	0	0	0	0	0	0	0	0
	2024	1.52368e+08	0	0	0	0	0	0	0	0	0	0	0
	2025	1.55528e+08	0	0	0	0	0	0	0	0	0	0	0
	2026	1.58688e+08	0	0	0	0	0	0	0	0	0	0	0
	2027	1.61847e+08	0	0	0	0	0	0	0	0	0	0	0
	2028	1.65007e+08	0	0	0	0	0	0	0	0	0	0	0
	2029	1.68166e+08	0	0	0	0	0	0	0	0	0	0	0
	2030	1.71326e+08	0	0	0	0	0	0	0	0	0	0	0
	2031	1.74485e+08	0	0	0	0	0	0	0	0	0	0	0
	2032	1.77645e+08	0	0	0	0	0	0	0	0	0	0	0
	2033	1.80805e+08	0	0	0	0	0	0	0	0	0	0	0
	2034	1.83964e+08	0	0	0	0	0	0	0	0	0	0	0
	2035	1.87124e+08	0	0	0	0	0	0	0	0	0	0	0
	2036	1.90283e+08	0	0	0	0	0	0	0	0	0	0	0
	2037	1.93443e+08	0	0	0	0	0	0	0	0	0	0	0
	2038	1.96603e+08	0	0	0	0	0	0	0	0	0	0	0
	2039	1.99762e+08	0	0	0	0	0	0	0	0	0	0	0
	2040	2.02922e+08	0	0	0	0	0	0	0	0	0	0	0
	2041	2.06081e+08	0	0	0	0	0	0	0	0	0	0	0
	2042	2.09241e+08	0	0	0	0	0	0	0	0	0	0	0
	2043	2.124e+08	0	0	0	0	0	0	0	0	0	0	0
	2044	2.1556e+08	0	0	0	0	0	0	0	0	0	0	0
	2045	2.1872e+08	0	0	0	0	0	0	0	0	0	0	0
	2046	2.21879e+08	0	0	0	0	0	0	0	0	0	0	0
	2047	2.25039e+08	0	0	0	0	0	0	0	0	0	0	0
	2048	2.28198e+08	0	0	0	0	0	0	0	0	0	0	0
	2049	2.31358e+08	0	0	0	0	0	0	0	0	0	0	0
	2050	2.34518e+08	0	0	0	0	0	0	0	0	0	0	0
	2051	2.37677e+08	0	0	0	0	0	0	0	0	0	0	0
	2052	2.40837e+08	0	0	0	0	0	0	0	0	0	0	0
	2053	2.43996e+08	0	0	0	0	0	0	0	0	0	0	0
	2054	2.47156e+08	0	0	0	0	0	0	0	0	0	0	0
	2055	2.50316e+08	0	0	0	0	0	0	0	0	0	0	0
	2056	2.53475e+08	0	0	0	0	0	0	0	0	0	0	0
	2057	2.56635e+08	0	0	0	0	0	0	0	0	0	0	0
	2058	2.59794e+08	0	0	0	0	0	0	0	0	0	0	0
	2059	2.62954e+08	0	0	0	0	0	0	0	0	0	0	0
	2060	2.66113e+08	0	0	0	0	0	0	0	0	0	0	0
	©2001-2010 Clean Air-Cool Planet, Inc. All rights reserved
	Clean Air-Cool Planet, Campus Carbon Calculator, and the Clean Air-Cool Planet logo are trademarks of Clean Air-Cool Planet, Inc.

## Sheet: Input_Commuter
	On this Worksheet: Estimates of commuter miles traveled for faculty, staff, and students.
	MODULE	Input
	WORKSHEET	Commuter Traffic
	UNIVERSITY	Please enter university name on 'Introduction' sheet
		STUDENTS																								Summary - Students													FACULTY
		1) Trips / Week			2) Weeks / Year	3) Trip Distribution (% Trips by Mode)								4) Trip Distance (Miles per One-Way Trip for Each Mode)							Fuel Efficiencies Used in Calculations					Summary - Students													1) Trips / Week			2) Weeks / Year	3) Trip Distribution (% Trips by Mode)
	Fiscal Year	Students Commuters	One-Way Trips / Week	Total Commuter Trips / Week	Weeks / Year	Bike	Walk	Drive Alone	Carpool	Bus	Light Rail	Commuter Rail	Total	Bike	Walk	Drive Alone	Carpool	Bus	Light Rail	Commuter Rail	Automobile Fuel Efficiency	Bus fuel efficiency	Light rail fuel efficiency	Commuter rail fuel efficiency - diesel	Commuter rail fuel efficiency - electric	Biking		Walking		Automobile Commuting		Bus Commuting		Light Rail Commuting		Commuter Rail Commuting			Faculty Commuters	One-Way Trips / Week	Total Commuter Trips / Week	Weeks / Year	Bike	Walk	Drive Alone	Carpool	Bus	Light Rail	Commuter Rail
		#	#	#	#	%	%	%	%	%	%	%	%	Passenger Miles	Passenger Miles	Vehicle Miles	Vehicle Miles	Passenger Miles	Passenger Miles	Passenger Miles	MPG	MPG / Passenger	Passenger Miles / kWh	Passenger Miles / Gallon	Passenger Miles / kWh	Total Miles	Fuel Consumed	Total Miles	Fuel Consumed	Total Miles	Gallons Gasoline	Total Miles	Gallons Diesel	Total Miles	kWh	Total Miles	Gallons Diesel	kWh	#	#	#	#	%	%	%	%	%	%	%
	1990			0									0								20.9246	37.2564	3.48368	134.432	5.77651	0	0	0	0	0	0	0	0	0	0	0	0	0			0
	1991			0									0								21.7646	36.8152	3.29358	135.211	5.92736	0	0	0	0	0	0	0	0	0	0	0	0	0			0
	1992			0									0								21.6014	34.3485	3.22751	133.21	6.51246	0	0	0	0	0	0	0	0	0	0	0	0	0			0
	1993			0									0								21.121	35.1669	3.12276	116.12	5.80268	0	0	0	0	0	0	0	0	0	0	0	0	0			0
	1994			0									0								21.2756	33.3272	2.93051	129.176	6.42765	0	0	0	0	0	0	0	0	0	0	0	0	0			0
	1995			0									0								21.693	32.5702	2.82543	130.724	6.57941	0	0	0	0	0	0	0	0	0	0	0	0	0			0
	1996			0									0								21.7836	32.2517	2.77661	134.937	6.65418	0	0	0	0	0	0	0	0	0	0	0	0	0			0
	1997			0									0								22.0333	33.3783	2.78512	127.194	6.32913	0	0	0	0	0	0	0	0	0	0	0	0	0			0
	1998			0									0								22.1453	33.595	2.92791	125.78	6.70054	0	0	0	0	0	0	0	0	0	0	0	0	0			0
	1999			0									0								21.9717	33.9135	2.93791	120.074	6.63086	0	0	0	0	0	0	0	0	0	0	0	0	0			0
	2000			0									0								22.4648	32.5042	2.66026	132.763	6.86277	0	0	0	0	0	0	0	0	0	0	0	0	0			0
	2001			0									0								22.7378	33.0713	2.50177	132.236	7.0517	0	0	0	0	0	0	0	0	0	0	0	0	0			0
	2002			0									0								22.5956	32.7969	2.487	130.465	7.12444	0	0	0	0	0	0	0	0	0	0	0	0	0			0
	2003			0									0								22.8151	31.8652	2.5957	132.279	6.91179	0	0	0	0	0	0	0	0	0	0	0	0	0			0
	2004			0									0								23.221	30.6268	2.48549	134.988	6.70738	0	0	0	0	0	0	0	0	0	0	0	0	0			0
	2005			0									0								22.9368	31.6891	2.48375	123.485	6.38342	0	0	0	0	0	0	0	0	0	0	0	0	0			0
	2006			0									0								23.4232	30.8878	2.53696	131.819	7.01015	0	0	0	0	0	0	0	0	0	0	0	0	0			0
	2007			0									0								24.1267	31.7601	2.57558	138.203	6.32615	0	0	0	0	0	0	0	0	0	0	0	0	0			0
	2008			0									0								24.2556	32.3558	2.56246	132.323	6.43132	0	0	0	0	0	0	0	0	0	0	0	0	0			0
	2009			0									0								24.1748	31.9319	2.71172	118.232	6.31011	0	0	0	0	0	0	0	0	0	0	0	0	0			0
	2010			0									0								24.1702	31.9319	2.65975	116.674	6.0512	0	0	0	0	0	0	0	0	0	0	0	0	0			0
	2011			0									0								24.1702	31.9319	2.65975	116.674	6.0512	0	0	0	0	0	0	0	0	0	0	0	0	0			0
	2012			0									0								24.1702	31.9319	2.65975	116.674	6.0512	0	0	0	0	0	0	0	0	0	0	0	0	0			0
	2013			0									0								24.1702	31.9319	2.65975	116.674	6.0512	0	0	0	0	0	0	0	0	0	0	0	0	0			0
	2014			0									0								24.1702	31.9319	2.65975	116.674	6.0512	0	0	0	0	0	0	0	0	0	0	0	0	0			0
	2015			0									0								24.1702	31.9319	2.65975	116.674	6.0512	0	0	0	0	0	0	0	0	0	0	0	0	0			0
	2016			0									0								24.1702	31.9319	2.65975	116.674	6.0512	0	0	0	0	0	0	0	0	0	0	0	0	0			0
	2017			0									0								24.1702	31.9319	2.65975	116.674	6.0512	0	0	0	0	0	0	0	0	0	0	0	0	0			0
	2018			0									0								24.1702	31.9319	2.65975	116.674	6.0512	0	0	0	0	0	0	0	0	0	0	0	0	0			0
	2019			0									0								24.1702	31.9319	2.65975	116.674	6.0512	0	0	0	0	0	0	0	0	0	0	0	0	0			0
	2020			0									0								24.1702	31.9319	2.65975	116.674	6.0512	0	0	0	0	0	0	0	0	0	0	0	0	0			0
	2021			0									0								24.1702	31.9319	2.65975	116.674	6.0512	0	0	0	0	0	0	0	0	0	0	0	0	0			0
	2022			0									0								24.1702	31.9319	2.65975	116.674	6.0512	0	0	0	0	0	0	0	0	0	0	0	0	0			0
	2023			0									0								24.1702	31.9319	2.65975	116.674	6.0512	0	0	0	0	0	0	0	0	0	0	0	0	0			0
	2024			0									0								24.1702	31.9319	2.65975	116.674	6.0512	0	0	0	0	0	0	0	0	0	0	0	0	0			0
	2025			0									0								24.1702	31.9319	2.65975	116.674	6.0512	0	0	0	0	0	0	0	0	0	0	0	0	0			0
	2026			0									0								24.1702	31.9319	2.65975	116.674	6.0512	0	0	0	0	0	0	0	0	0	0	0	0	0			0
	2027			0									0								24.1702	31.9319	2.65975	116.674	6.0512	0	0	0	0	0	0	0	0	0	0	0	0	0			0
	2028			0									0								24.1702	31.9319	2.65975	116.674	6.0512	0	0	0	0	0	0	0	0	0	0	0	0	0			0
	2029			0									0								24.1702	31.9319	2.65975	116.674	6.0512	0	0	0	0	0	0	0	0	0	0	0	0	0			0
	2030			0									0								24.1702	31.9319	2.65975	116.674	6.0512	0	0	0	0	0	0	0	0	0	0	0	0	0			0
	2031			0									0								24.1702	31.9319	2.65975	116.674	6.0512	0	0	0	0	0	0	0	0	0	0	0	0	0			0
	2032			0									0								24.1702	31.9319	2.65975	116.674	6.0512	0	0	0	0	0	0	0	0	0	0	0	0	0			0
	2033			0									0								24.1702	31.9319	2.65975	116.674	6.0512	0	0	0	0	0	0	0	0	0	0	0	0	0			0
	2034			0									0								24.1702	31.9319	2.65975	116.674	6.0512	0	0	0	0	0	0	0	0	0	0	0	0	0			0
	2035			0									0								24.1702	31.9319	2.65975	116.674	6.0512	0	0	0	0	0	0	0	0	0	0	0	0	0			0
	2036			0									0								24.1702	31.9319	2.65975	116.674	6.0512	0	0	0	0	0	0	0	0	0	0	0	0	0			0
	2037			0									0								24.1702	31.9319	2.65975	116.674	6.0512	0	0	0	0	0	0	0	0	0	0	0	0	0			0
	2038			0									0								24.1702	31.9319	2.65975	116.674	6.0512	0	0	0	0	0	0	0	0	0	0	0	0	0			0
	2039			0									0								24.1702	31.9319	2.65975	116.674	6.0512	0	0	0	0	0	0	0	0	0	0	0	0	0			0
	2040			0									0								24.1702	31.9319	2.65975	116.674	6.0512	0	0	0	0	0	0	0	0	0	0	0	0	0			0
	2041			0									0								24.1702	31.9319	2.65975	116.674	6.0512	0	0	0	0	0	0	0	0	0	0	0	0	0			0
	2042			0									0								24.1702	31.9319	2.65975	116.674	6.0512	0	0	0	0	0	0	0	0	0	0	0	0	0			0
	2043			0									0								24.1702	31.9319	2.65975	116.674	6.0512	0	0	0	0	0	0	0	0	0	0	0	0	0			0
	2044			0									0								24.1702	31.9319	2.65975	116.674	6.0512	0	0	0	0	0	0	0	0	0	0	0	0	0			0
	2045			0									0								24.1702	31.9319	2.65975	116.674	6.0512	0	0	0	0	0	0	0	0	0	0	0	0	0			0
	2046			0									0								24.1702	31.9319	2.65975	116.674	6.0512	0	0	0	0	0	0	0	0	0	0	0	0	0			0
	2047			0									0								24.1702	31.9319	2.65975	116.674	6.0512	0	0	0	0	0	0	0	0	0	0	0	0	0			0
	2048			0									0								24.1702	31.9319	2.65975	116.674	6.0512	0	0	0	0	0	0	0	0	0	0	0	0	0			0
	2049			0									0								24.1702	31.9319	2.65975	116.674	6.0512	0	0	0	0	0	0	0	0	0	0	0	0	0			0
	2050			0									0								24.1702	31.9319	2.65975	116.674	6.0512	0	0	0	0	0	0	0	0	0	0	0	0	0			0
	2051			0									0								24.1702	31.9319	2.65975	116.674	6.0512	0	0	0	0	0	0	0	0	0	0	0	0	0			0
	2052			0									0								24.1702	31.9319	2.65975	116.674	6.0512	0	0	0	0	0	0	0	0	0	0	0	0	0			0
	2053			0									0								24.1702	31.9319	2.65975	116.674	6.0512	0	0	0	0	0	0	0	0	0	0	0	0	0			0
	2054			0									0								24.1702	31.9319	2.65975	116.674	6.0512	0	0	0	0	0	0	0	0	0	0	0	0	0			0
	2055			0									0								24.1702	31.9319	2.65975	116.674	6.0512	0	0	0	0	0	0	0	0	0	0	0	0	0			0
	2056			0									0								24.1702	31.9319	2.65975	116.674	6.0512	0	0	0	0	0	0	0	0	0	0	0	0	0			0
	2057			0									0								24.1702	31.9319	2.65975	116.674	6.0512	0	0	0	0	0	0	0	0	0	0	0	0	0			0
	2058			0									0								24.1702	31.9319	2.65975	116.674	6.0512	0	0	0	0	0	0	0	0	0	0	0	0	0			0
	2059			0									0								24.1702	31.9319	2.65975	116.674	6.0512	0	0	0	0	0	0	0	0	0	0	0	0	0			0
	2060			0									0								24.1702	31.9319	2.65975	116.674	6.0512	0	0	0	0	0	0	0	0	0	0	0	0	0			0
				Total Commuter Trips / Week = Number of Commuters * One-Way Trips / Week									Total % Mode Splits = Sum of all % Trips Made by Each Mode								3	3	35	35	35	Total Distance = Total Trips / Week * Weeks / Year * % Trips by Bike * Miles / Trip	Assuming bikers do not use any fuel.	Total Distance = Total Trips / Week * Weeks / Year * % Trips by Foot * Miles / Trip	Assuming pedestrians do not use any fuel.	Total Distance = ((Total Trips / Week * Weeks / Year * % Trips Driven Alone * Miles / Trip) + (Total Trips / Week * Weeks / Year * % Carpool * Miles / Trip % Carpool)/2)	Fuel Consumption = Total Distance / Fuel Efficiency	Total Distance = Total Trips / Week * Weeks / Year * % Trips by Bus * Miles / Trip	Fuel Consumption = Total Distance / Fuel Efficiency	Total Distance = Total Trips / Week * Weeks / Year * % Trips by Light Rail * Miles / Trip	Fuel Consumption = Total Distance / Fuel Efficiency	Total Distance = Total Trips / Week * Weeks / Year * % Trips by Commuter Rail * Miles / Trip	Fuel Consumption = Total Distance / Fuel Efficiency	Fuel Consumption = Total Distance / Fuel Efficiency			Total Commuter Trips / Week = Number of Commuters * One-Way Trips / Week
	©2001-2010 Clean Air-Cool Planet, Inc. All rights reserved
	Clean Air-Cool Planet, Campus Carbon Calculator, and the Clean Air-Cool Planet logo are trademarks of Clean Air-Cool Planet, Inc.
[truncated: 76 more columns]

## Sheet: S_CO2
	On this Worksheet: CO2 emissions from all sources. These numbers are the product of the emission factor and the input data. Some sources have no formulas because they have no CO2 emissions, but are included to keep formatting consistent.
	MODULE	Summary
	WORKSHEET	CO2
	UNIVERSITY	Please enter university name on 'Introduction' sheet
		--- Scope 1 Emissions Sources ---
		On-Campus Stationary Sources																														Direct Transportation Sources										Refrigerants & Chemicals						Agriculture Sources
	Fiscal Year	On-Campus Cogeneration Plant(s)															Other On-Campus Stationary Sources															University Fleet										Refrigerants & Chemicals						Fertilizer
		Residual Oil (#5-6)	Distillate Oil (#1-4)	Natural Gas	LPG (Propane)	Coal (Steam Coal)	Incinerated Waste	Wood Chips	Wood Pellets	Grass Pellets	Residual BioHeat	Distillate BioHeat	Attributable Solar - Electric	Attributable Solar - Thermal	Attributable Wind	Other Biogenic	Residual Oil (#5-6)	Distillate Oil (#1-4)	Natural Gas	LPG (Propane)	Coal (Steam Coal)	Incinerated Waste	Wood Chips	Wood Pellets	Grass Pellets	Residual BioHeat	Distillate BioHeat	Attributable Solar - Electric	Attributable Solar - Thermal	Attributable Wind	Other Biogenic	Gasoline Fleet	Diesel Fleet	Natural Gas Fleet	E85 Fleet	B5 Fleet	B20 Fleet	B100	Hydrogen	Other Fleet Fuel	Electric Fleet	HFC-134a	HFC-404a	HCFC-22	HCFE-235da2	HG-10	Other	Synthetic	Organic
		kg CO2	kg CO2	kg CO2	kg CO2	kg CO2	kg CO2	kg CO2	kg CO2	kg CO2	kg CO2	kg CO2	kWh	MMBtu	kWh	kg CO2	kg CO2	kg CO2	kg CO2	kg CO2	kg CO2	kg CO2	kg CO2	kg CO2	kg CO2	kg CO2	kg CO2	kWh	MMBtu	kWh	kg CO2	kg CO2	kg CO2	kg CO2	kg CO2	kg CO2	kg CO2	kg CO2	kg CO2	kg CO2	kg CO2	kg CO2	kg CO2	kg CO2	kg CO2	kg CO2	kg CO2	kg CO2	kg CO2
	1990	0	0	0	0	0	0	0	0	0	0	0				0	0	0	0	0	0	0	0	0	0	0	0				0	0	0	0	0	0	0	0	0	0	0
	1991	0	0	0	0	0	0	0	0	0	0	0				0	0	0	0	0	0	0	0	0	0	0	0				0	0	0	0	0	0	0	0	0	0	0
	1992	0	0	0	0	0	0	0	0	0	0	0				0	0	0	0	0	0	0	0	0	0	0	0				0	0	0	0	0	0	0	0	0	0	0
	1993	0	0	0	0	0	0	0	0	0	0	0				0	0	0	0	0	0	0	0	0	0	0	0				0	0	0	0	0	0	0	0	0	0	0
	1994	0	0	0	0	0	0	0	0	0	0	0				0	0	0	0	0	0	0	0	0	0	0	0				0	0	0	0	0	0	0	0	0	0	0
	1995	0	0	0	0	0	0	0	0	0	0	0				0	0	0	0	0	0	0	0	0	0	0	0				0	0	0	0	0	0	0	0	0	0	0
	1996	0	0	0	0	0	0	0	0	0	0	0				0	0	0	0	0	0	0	0	0	0	0	0				0	0	0	0	0	0	0	0	0	0	0
	1997	0	0	0	0	0	0	0	0	0	0	0				0	0	0	0	0	0	0	0	0	0	0	0				0	0	0	0	0	0	0	0	0	0	0
	1998	0	0	0	0	0	0	0	0	0	0	0				0	0	0	0	0	0	0	0	0	0	0	0				0	0	0	0	0	0	0	0	0	0	0
	1999	0	0	0	0	0	0	0	0	0	0	0				0	0	0	0	0	0	0	0	0	0	0	0				0	0	0	0	0	0	0	0	0	0	0
	2000	0	0	0	0	0	0	0	0	0	0	0				0	0	0	0	0	0	0	0	0	0	0	0				0	0	0	0	0	0	0	0	0	0	0
	2001	0	0	0	0	0	0	0	0	0	0	0				0	0	0	0	0	0	0	0	0	0	0	0				0	0	0	0	0	0	0	0	0	0	0
	2002	0	0	0	0	0	0	0	0	0	0	0				0	0	0	0	0	0	0	0	0	0	0	0				0	0	0	0	0	0	0	0	0	0	0
	2003	0	0	0	0	0	0	0	0	0	0	0				0	0	0	0	0	0	0	0	0	0	0	0				0	0	0	0	0	0	0	0	0	0	0
	2004	0	0	0	0	0	0	0	0	0	0	0				0	0	0	0	0	0	0	0	0	0	0	0				0	0	0	0	0	0	0	0	0	0	0
	2005	0	0	0	0	0	0	0	0	0	0	0				0	0	0	0	0	0	0	0	0	0	0	0				0	0	0	0	0	0	0	0	0	0	0
	2006	0	0	0	0	0	0	0	0	0	0	0				0	0	0	0	0	0	0	0	0	0	0	0				0	0	0	0	0	0	0	0	0	0	0
	2007	0	0	0	0	0	0	0	0	0	0	0				0	0	0	9.11833e+06	0	0	0	0	0	0	0	0				0	943369	0	0	0	0	0	0	0	0	0
	2008	0	0	0	0	0	0	0	0	0	0	0				0	0	0	0	0	0	0	0	0	0	0	0				0	0	0	0	0	0	0	0	0	0	0
	2009	0	0	0	0	0	0	0	0	0	0	0				0	0	0	8.90672e+06	0	0	0	0	0	0	0	0				0	1.04496e+06	490678	0	0	0	0	0	0	0	0
	2010	0	0	0	0	0	0	0	0	0	0	0				0	0	0	0	0	0	0	0	0	0	0	0				0	0	0	0	0	0	0	0	0	0	0
	2011	0	0	0	0	0	0	0	0	0	0	0				0	0	0	9.8772e+06	2389.07	0	0	0	0	0	0	0				0	1.22155e+06	186266	0	0	0	0	0	0	0	0
	2012	0	0	0	0	0	0	0	0	0	0	0				0	0	0	9.19955e+06	1230.6	0	0	0	0	0	0	0				0	1.28511e+06	76887.1	0	0	0	0	0	0	0	0
	2013	0	0	0	0	0	0	0	0	0	0	0				0	0	0	9.19955e+06	1230.6	0	0	0	0	0	0	0				0	1.22155e+06	1.36504e+06	0	0	0	0	0	0	0	0
	2014	0	0	0	0	0	0	0	0	0	0	0				0	0	0	9.42983e+06	458.297	0	0	0	0	0	0	0				0	1.34586e+06	937001	0	0	0	0	0	0	0	0
	2015	0	0	0	0	0	0	0	0	0	0	0				0	0	0	9.47693e+06	-120.935	0	0	0	0	0	0	0				0	1.4024e+06	1.0851e+06	0	0	0	0	0	0	0	0
	2016	0	0	0	0	0	0	0	0	0	0	0				0	0	0	9.52403e+06	-700.166	0	0	0	0	0	0	0				0	1.45894e+06	1.23321e+06	0	0	0	0	0	0	0	0
	2017	0	0	0	0	0	0	0	0	0	0	0				0	0	0	9.57113e+06	-1279.4	0	0	0	0	0	0	0				0	1.51548e+06	1.38131e+06	0	0	0	0	0	0	0	0
	2018	0	0	0	0	0	0	0	0	0	0	0				0	0	0	9.61823e+06	-1858.63	0	0	0	0	0	0	0				0	1.57202e+06	1.52941e+06	0	0	0	0	0	0	0	0
	2019	0	0	0	0	0	0	0	0	0	0	0				0	0	0	9.66533e+06	-2437.86	0	0	0	0	0	0	0				0	1.62856e+06	1.67751e+06	0	0	0	0	0	0	0	0
	2020	0	0	0	0	0	0	0	0	0	0	0				0	0	0	9.71243e+06	-3017.09	0	0	0	0	0	0	0				0	1.6851e+06	1.82562e+06	0	0	0	0	0	0	0	0
	2021	0	0	0	0	0	0	0	0	0	0	0				0	0	0	9.75953e+06	-3596.32	0	0	0	0	0	0	0				0	1.74164e+06	1.97372e+06	0	0	0	0	0	0	0	0
	2022	0	0	0	0	0	0	0	0	0	0	0				0	0	0	9.80663e+06	-4175.55	0	0	0	0	0	0	0				0	1.79819e+06	2.12182e+06	0	0	0	0	0	0	0	0
	2023	0	0	0	0	0	0	0	0	0	0	0				0	0	0	9.85373e+06	-4754.78	0	0	0	0	0	0	0				0	1.85473e+06	2.26993e+06	0	0	0	0	0	0	0	0
	2024	0	0	0	0	0	0	0	0	0	0	0				0	0	0	9.90083e+06	-5334.02	0	0	0	0	0	0	0				0	1.91127e+06	2.41803e+06	0	0	0	0	0	0	0	0
	2025	0	0	0	0	0	0	0	0	0	0	0				0	0	0	9.94793e+06	-5913.25	0	0	0	0	0	0	0				0	1.96781e+06	2.56613e+06	0	0	0	0	0	0	0	0
	2026	0	0	0	0	0	0	0	0	0	0	0				0	0	0	9.99503e+06	-6492.48	0	0	0	0	0	0	0				0	2.02435e+06	2.71423e+06	0	0	0	0	0	0	0	0
	2027	0	0	0	0	0	0	0	0	0	0	0				0	0	0	1.00421e+07	-7071.71	0	0	0	0	0	0	0				0	2.08089e+06	2.86234e+06	0	0	0	0	0	0	0	0
	2028	0	0	0	0	0	0	0	0	0	0	0				0	0	0	1.00892e+07	-7650.94	0	0	0	0	0	0	0				0	2.13743e+06	3.01044e+06	0	0	0	0	0	0	0	0
	2029	0	0	0	0	0	0	0	0	0	0	0				0	0	0	1.01363e+07	-8230.17	0	0	0	0	0	0	0				0	2.19397e+06	3.15854e+06	0	0	0	0	0	0	0	0
	2030	0	0	0	0	0	0	0	0	0	0	0				0	0	0	1.01834e+07	-8809.4	0	0	0	0	0	0	0				0	2.25052e+06	3.30664e+06	0	0	0	0	0	0	0	0
	2031	0	0	0	0	0	0	0	0	0	0	0				0	0	0	1.02305e+07	-9388.63	0	0	0	0	0	0	0				0	2.30706e+06	3.45475e+06	0	0	0	0	0	0	0	0
	2032	0	0	0	0	0	0	0	0	0	0	0				0	0	0	1.02776e+07	-9967.87	0	0	0	0	0	0	0				0	2.3636e+06	3.60285e+06	0	0	0	0	0	0	0	0
	2033	0	0	0	0	0	0	0	0	0	0	0				0	0	0	1.03247e+07	-10547.1	0	0	0	0	0	0	0				0	2.42014e+06	3.75095e+06	0	0	0	0	0	0	0	0
	2034	0	0	0	0	0	0	0	0	0	0	0				0	0	0	1.03718e+07	-11126.3	0	0	0	0	0	0	0				0	2.47668e+06	3.89906e+06	0	0	0	0	0	0	0	0
	2035	0	0	0	0	0	0	0	0	0	0	0				0	0	0	1.04189e+07	-11705.6	0	0	0	0	0	0	0				0	2.53322e+06	4.04716e+06	0	0	0	0	0	0	0	0
	2036	0	0	0	0	0	0	0	0	0	0	0				0	0	0	1.0466e+07	-12284.8	0	0	0	0	0	0	0				0	2.58976e+06	4.19526e+06	0	0	0	0	0	0	0	0
	2037	0	0	0	0	0	0	0	0	0	0	0				0	0	0	1.05131e+07	-12864	0	0	0	0	0	0	0				0	2.6463e+06	4.34336e+06	0	0	0	0	0	0	0	0
	2038	0	0	0	0	0	0	0	0	0	0	0				0	0	0	1.05602e+07	-13443.3	0	0	0	0	0	0	0				0	2.70285e+06	4.49147e+06	0	0	0	0	0	0	0	0
	2039	0	0	0	0	0	0	0	0	0	0	0				0	0	0	1.06073e+07	-14022.5	0	0	0	0	0	0	0				0	2.75939e+06	4.63957e+06	0	0	0	0	0	0	0	0
	2040	0	0	0	0	0	0	0	0	0	0	0				0	0	0	1.06544e+07	-14601.7	0	0	0	0	0	0	0				0	2.81593e+06	4.78767e+06	0	0	0	0	0	0	0	0
	2041	0	0	0	0	0	0	0	0	0	0	0				0	0	0	1.07015e+07	-15180.9	0	0	0	0	0	0	0				0	2.87247e+06	4.93577e+06	0	0	0	0	0	0	0	0
	2042	0	0	0	0	0	0	0	0	0	0	0				0	0	0	1.07486e+07	-15760.2	0	0	0	0	0	0	0				0	2.92901e+06	5.08388e+06	0	0	0	0	0	0	0	0
	2043	0	0	0	0	0	0	0	0	0	0	0				0	0	0	1.07957e+07	-16339.4	0	0	0	0	0	0	0				0	2.98555e+06	5.23198e+06	0	0	0	0	0	0	0	0
	2044	0	0	0	0	0	0	0	0	0	0	0				0	0	0	1.08428e+07	-16918.6	0	0	0	0	0	0	0				0	3.04209e+06	5.38008e+06	0	0	0	0	0	0	0	0
	2045	0	0	0	0	0	0	0	0	0	0	0				0	0	0	1.08899e+07	-17497.9	0	0	0	0	0	0	0				0	3.09863e+06	5.52819e+06	0	0	0	0	0	0	0	0
	2046	0	0	0	0	0	0	0	0	0	0	0				0	0	0	1.0937e+07	-18077.1	0	0	0	0	0	0	0				0	3.15517e+06	5.67629e+06	0	0	0	0	0	0	0	0
	2047	0	0	0	0	0	0	0	0	0	0	0				0	0	0	1.09841e+07	-18656.3	0	0	0	0	0	0	0				0	3.21172e+06	5.82439e+06	0	0	0	0	0	0	0	0
	2048	0	0	0	0	0	0	0	0	0	0	0				0	0	0	1.10312e+07	-19235.6	0	0	0	0	0	0	0				0	3.26826e+06	5.97249e+06	0	0	0	0	0	0	0	0
	2049	0	0	0	0	0	0	0	0	0	0	0				0	0	0	1.10783e+07	-19814.8	0	0	0	0	0	0	0				0	3.3248e+06	6.1206e+06	0	0	0	0	0	0	0	0
	2050	0	0	0	0	0	0	0	0	0	0	0				0	0	0	1.11254e+07	-20394	0	0	0	0	0	0	0				0	3.38134e+06	6.2687e+06	0	0	0	0	0	0	0	0
	2051	0	0	0	0	0	0	0	0	0	0	0				0	0	0	1.11725e+07	-20973.3	0	0	0	0	0	0	0				0	3.43788e+06	6.4168e+06	0	0	0	0	0	0	0	0
	2052	0	0	0	0	0	0	0	0	0	0	0				0	0	0	1.12196e+07	-21552.5	0	0	0	0	0	0	0				0	3.49442e+06	6.5649e+06	0	0	0	0	0	0	0	0
	2053	0	0	0	0	0	0	0	0	0	0	0				0	0	0	1.12667e+07	-22131.7	0	0	0	0	0	0	0				0	3.55096e+06	6.71301e+06	0	0	0	0	0	0	0	0
	2054	0	0	0	0	0	0	0	0	0	0	0				0	0	0	1.13138e+07	-22711	0	0	0	0	0	0	0				0	3.6075e+06	6.86111e+06	0	0	0	0	0	0	0	0
	2055	0	0	0	0	0	0	0	0	0	0	0				0	0	0	1.13609e+07	-23290.2	0	0	0	0	0	0	0				0	3.66405e+06	7.00921e+06	0	0	0	0	0	0	0	0
	2056	0	0	0	0	0	0	0	0	0	0	0				0	0	0	1.1408e+07	-23869.4	0	0	0	0	0	0	0				0	3.72059e+06	7.15732e+06	0	0	0	0	0	0	0	0
	2057	0	0	0	0	0	0	0	0	0	0	0				0	0	0	1.14551e+07	-24448.6	0	0	0	0	0	0	0				0	3.77713e+06	7.30542e+06	0	0	0	0	0	0	0	0
	2058	0	0	0	0	0	0	0	0	0	0	0				0	0	0	1.15022e+07	-25027.9	0	0	0	0	0	0	0				0	3.83367e+06	7.45352e+06	0	0	0	0	0	0	0	0
	2059	0	0	0	0	0	0	0	0	0	0	0				0	0	0	1.15493e+07	-25607.1	0	0	0	0	0	0	0				0	3.89021e+06	7.60162e+06	0	0	0	0	0	0	0	0
	2060	0	0	0	0	0	0	0	0	0	0	0				0	0	0	1.15964e+07	-26186.3	0	0	0	0	0	0	0				0	3.94675e+06	7.74973e+06	0	0	0	0	0	0	0	0
	©2001-2009 Clean Air-Cool Planet, Inc. All rights reserved
[truncated: 58 more columns]

## Sheet: S_CH4
	On this Worksheet: CH4 emissions from all sources. These numbers are the product of the emission factor and the input data. Some sources have no formulas because they have no CO2 emissions, but are included to keep formatting consistent.
	MODULE	Summary
	WORKSHEET	CH4
	UNIVERSITY	Please enter university name on 'Introduction' sheet
		--- Scope 1 Emissions Sources ---
		On-Campus Stationary Sources																														Direct Transportation Sources										Refrigerants & Chemicals						Agriculture Sources
	Fiscal Year	On-Campus Cogeneration Plant(s)															Other On-Campus Stationary Sources															University Fleet										Refrigerants & Chemicals						Fertilizer
		Residual Oil (#5-6)	Distillate Oil (#1-4)	Natural Gas	LPG (Propane)	Coal (Steam Coal)	Incinerated Waste	Wood Chips	Wood Pellets	Grass Pellets	Residual BioHeat	Distillate BioHeat	Attributable Solar - Electric	Attributable Solar - Thermal	Attributable Wind	Other	Residual Oil (#5-6)	Distillate Oil (#1-4)	Natural Gas	LPG (Propane)	Coal (Steam Coal)	Incinerated Waste	Wood Chips	Wood Pellets	Grass Pellets	Residual BioHeat	Distillate BioHeat	Attributable Solar - Electric	Attributable Solar - Thermal	Attributable Wind	Other	Gasoline Fleet	Diesel Fleet	Natural Gas Fleet	E85 Fleet	B5 Fleet	B20 Fleet	B100	Hydrogen	Other Fleet Fuel	Electric Fleet	HFC-134a	HFC-404a	HCFC-22	HCFE-235da2	HG-10	Other	Synthetic	Organic
		kg CH4	kg CH4	kg CH4	kg CH4	kg CH4	kg CH4	kg CH4	kg CH4	kg CH4	kg CH4	kg CH4	kWh	MMBtu	kWh	kg CH4	kg CH4	kg CH4	kg CH4	kg CH4	kg CH4	kg CH4	kg CH4	kg CH4	kg CH4	kg CH4	kg CH4	kWh	MMBtu	kWh	kg CH4	kg CH4	kg CH4	kg CH4	kg CH4	kg CH4	kg CH4	kg CH4	kg CH4	kg CH4	kg CH4	kg CH4	kg CH4	kg CH4	kg CH4	kg CH4	kg CH4	kg CH4	kg CH4
	1990	0	0	0	0	0	0	0	0	0	0	0				0	0	0	0	0	0	0	0	0	0	0	0				0	0	0	0	0	0	0	0	0	0	0
	1991	0	0	0	0	0	0	0	0	0	0	0				0	0	0	0	0	0	0	0	0	0	0	0				0	0	0	0	0	0	0	0	0	0	0
	1992	0	0	0	0	0	0	0	0	0	0	0				0	0	0	0	0	0	0	0	0	0	0	0				0	0	0	0	0	0	0	0	0	0	0
	1993	0	0	0	0	0	0	0	0	0	0	0				0	0	0	0	0	0	0	0	0	0	0	0				0	0	0	0	0	0	0	0	0	0	0
	1994	0	0	0	0	0	0	0	0	0	0	0				0	0	0	0	0	0	0	0	0	0	0	0				0	0	0	0	0	0	0	0	0	0	0
	1995	0	0	0	0	0	0	0	0	0	0	0				0	0	0	0	0	0	0	0	0	0	0	0				0	0	0	0	0	0	0	0	0	0	0
	1996	0	0	0	0	0	0	0	0	0	0	0				0	0	0	0	0	0	0	0	0	0	0	0				0	0	0	0	0	0	0	0	0	0	0
	1997	0	0	0	0	0	0	0	0	0	0	0				0	0	0	0	0	0	0	0	0	0	0	0				0	0	0	0	0	0	0	0	0	0	0
	1998	0	0	0	0	0	0	0	0	0	0	0				0	0	0	0	0	0	0	0	0	0	0	0				0	0	0	0	0	0	0	0	0	0	0
	1999	0	0	0	0	0	0	0	0	0	0	0				0	0	0	0	0	0	0	0	0	0	0	0				0	0	0	0	0	0	0	0	0	0	0
	2000	0	0	0	0	0	0	0	0	0	0	0				0	0	0	0	0	0	0	0	0	0	0	0				0	0	0	0	0	0	0	0	0	0	0
	2001	0	0	0	0	0	0	0	0	0	0	0				0	0	0	0	0	0	0	0	0	0	0	0				0	0	0	0	0	0	0	0	0	0	0
	2002	0	0	0	0	0	0	0	0	0	0	0				0	0	0	0	0	0	0	0	0	0	0	0				0	0	0	0	0	0	0	0	0	0	0
	2003	0	0	0	0	0	0	0	0	0	0	0				0	0	0	0	0	0	0	0	0	0	0	0				0	0	0	0	0	0	0	0	0	0	0
	2004	0	0	0	0	0	0	0	0	0	0	0				0	0	0	0	0	0	0	0	0	0	0	0				0	0	0	0	0	0	0	0	0	0	0
	2005	0	0	0	0	0	0	0	0	0	0	0				0	0	0	0	0	0	0	0	0	0	0	0				0	0	0	0	0	0	0	0	0	0	0
	2006	0	0	0	0	0	0	0	0	0	0	0				0	0	0	0	0	0	0	0	0	0	0	0				0	0	0	0	0	0	0	0	0	0	0
	2007	0	0	0	0	0	0	0	0	0	0	0				0	0	0	907.189	0	0	0	0	0	0	0	0				0	197.432	0	0	0	0	0	0	0	0	0
	2008	0	0	0	0	0	0	0	0	0	0	0				0	0	0	0	0	0	0	0	0	0	0	0				0	0	0	0	0	0	0	0	0	0	0
	2009	0	0	0	0	0	0	0	0	0	0	0				0	0	0	886.137	0	0	0	0	0	0	0	0				0	219.817	27.1241	0	0	0	0	0	0	0	0
	2010	0	0	0	0	0	0	0	0	0	0	0				0	0	0	0	0	0	0	0	0	0	0	0				0	0	0	0	0	0	0	0	0	0	0
	2011	0	0	0	0	0	0	0	0	0	0	0				0	0	0	982.69	0.408437	0	0	0	0	0	0	0				0	256.969	10.2965	0	0	0	0	0	0	0	0
	2012	0	0	0	0	0	0	0	0	0	0	0				0	0	0	915.271	0.210385	0	0	0	0	0	0	0				0	270.339	4.25023	0	0	0	0	0	0	0	0
	2013	0	0	0	0	0	0	0	0	0	0	0				0	0	0	915.271	0.210385	0	0	0	0	0	0	0				0	256.969	75.4581	0	0	0	0	0	0	0	0
	2014	0	0	0	0	0	0	0	0	0	0	0				0	0	0	938.181	0.0783508	0	0	0	0	0	0	0				0	283.118	51.7964	0	0	0	0	0	0	0	0
	2015	0	0	0	0	0	0	0	0	0	0	0				0	0	0	942.867	-0.0206751	0	0	0	0	0	0	0				0	295.012	59.9833	0	0	0	0	0	0	0	0
	2016	0	0	0	0	0	0	0	0	0	0	0				0	0	0	947.553	-0.119701	0	0	0	0	0	0	0				0	306.907	68.1703	0	0	0	0	0	0	0	0
	2017	0	0	0	0	0	0	0	0	0	0	0				0	0	0	952.239	-0.218727	0	0	0	0	0	0	0				0	318.801	76.3572	0	0	0	0	0	0	0	0
	2018	0	0	0	0	0	0	0	0	0	0	0				0	0	0	956.925	-0.317753	0	0	0	0	0	0	0				0	330.695	84.5442	0	0	0	0	0	0	0	0
	2019	0	0	0	0	0	0	0	0	0	0	0				0	0	0	961.611	-0.416779	0	0	0	0	0	0	0				0	342.589	92.7311	0	0	0	0	0	0	0	0
	2020	0	0	0	0	0	0	0	0	0	0	0				0	0	0	966.297	-0.515805	0	0	0	0	0	0	0				0	354.483	100.918	0	0	0	0	0	0	0	0
	2021	0	0	0	0	0	0	0	0	0	0	0				0	0	0	970.983	-0.614831	0	0	0	0	0	0	0				0	366.378	109.105	0	0	0	0	0	0	0	0
	2022	0	0	0	0	0	0	0	0	0	0	0				0	0	0	975.669	-0.713857	0	0	0	0	0	0	0				0	378.272	117.292	0	0	0	0	0	0	0	0
	2023	0	0	0	0	0	0	0	0	0	0	0				0	0	0	980.355	-0.812882	0	0	0	0	0	0	0				0	390.166	125.479	0	0	0	0	0	0	0	0
	2024	0	0	0	0	0	0	0	0	0	0	0				0	0	0	985.041	-0.911908	0	0	0	0	0	0	0				0	402.06	133.666	0	0	0	0	0	0	0	0
	2025	0	0	0	0	0	0	0	0	0	0	0				0	0	0	989.727	-1.01093	0	0	0	0	0	0	0				0	413.954	141.853	0	0	0	0	0	0	0	0
	2026	0	0	0	0	0	0	0	0	0	0	0				0	0	0	994.413	-1.10996	0	0	0	0	0	0	0				0	425.848	150.04	0	0	0	0	0	0	0	0
	2027	0	0	0	0	0	0	0	0	0	0	0				0	0	0	999.099	-1.20899	0	0	0	0	0	0	0				0	437.743	158.227	0	0	0	0	0	0	0	0
	2028	0	0	0	0	0	0	0	0	0	0	0				0	0	0	1003.79	-1.30801	0	0	0	0	0	0	0				0	449.637	166.414	0	0	0	0	0	0	0	0
	2029	0	0	0	0	0	0	0	0	0	0	0				0	0	0	1008.47	-1.40704	0	0	0	0	0	0	0				0	461.531	174.601	0	0	0	0	0	0	0	0
	2030	0	0	0	0	0	0	0	0	0	0	0				0	0	0	1013.16	-1.50606	0	0	0	0	0	0	0				0	473.425	182.788	0	0	0	0	0	0	0	0
	2031	0	0	0	0	0	0	0	0	0	0	0				0	0	0	1017.84	-1.60509	0	0	0	0	0	0	0				0	485.319	190.975	0	0	0	0	0	0	0	0
	2032	0	0	0	0	0	0	0	0	0	0	0				0	0	0	1022.53	-1.70412	0	0	0	0	0	0	0				0	497.214	199.161	0	0	0	0	0	0	0	0
	2033	0	0	0	0	0	0	0	0	0	0	0				0	0	0	1027.22	-1.80314	0	0	0	0	0	0	0				0	509.108	207.348	0	0	0	0	0	0	0	0
	2034	0	0	0	0	0	0	0	0	0	0	0				0	0	0	1031.9	-1.90217	0	0	0	0	0	0	0				0	521.002	215.535	0	0	0	0	0	0	0	0
	2035	0	0	0	0	0	0	0	0	0	0	0				0	0	0	1036.59	-2.00119	0	0	0	0	0	0	0				0	532.896	223.722	0	0	0	0	0	0	0	0
	2036	0	0	0	0	0	0	0	0	0	0	0				0	0	0	1041.27	-2.10022	0	0	0	0	0	0	0				0	544.79	231.909	0	0	0	0	0	0	0	0
	2037	0	0	0	0	0	0	0	0	0	0	0				0	0	0	1045.96	-2.19925	0	0	0	0	0	0	0				0	556.685	240.096	0	0	0	0	0	0	0	0
	2038	0	0	0	0	0	0	0	0	0	0	0				0	0	0	1050.65	-2.29827	0	0	0	0	0	0	0				0	568.579	248.283	0	0	0	0	0	0	0	0
	2039	0	0	0	0	0	0	0	0	0	0	0				0	0	0	1055.33	-2.3973	0	0	0	0	0	0	0				0	580.473	256.47	0	0	0	0	0	0	0	0
	2040	0	0	0	0	0	0	0	0	0	0	0				0	0	0	1060.02	-2.49632	0	0	0	0	0	0	0				0	592.367	264.657	0	0	0	0	0	0	0	0
	2041	0	0	0	0	0	0	0	0	0	0	0				0	0	0	1064.7	-2.59535	0	0	0	0	0	0	0				0	604.261	272.844	0	0	0	0	0	0	0	0
	2042	0	0	0	0	0	0	0	0	0	0	0				0	0	0	1069.39	-2.69437	0	0	0	0	0	0	0				0	616.155	281.031	0	0	0	0	0	0	0	0
	2043	0	0	0	0	0	0	0	0	0	0	0				0	0	0	1074.08	-2.7934	0	0	0	0	0	0	0				0	628.05	289.218	0	0	0	0	0	0	0	0
	2044	0	0	0	0	0	0	0	0	0	0	0				0	0	0	1078.76	-2.89243	0	0	0	0	0	0	0				0	639.944	297.405	0	0	0	0	0	0	0	0
	2045	0	0	0	0	0	0	0	0	0	0	0				0	0	0	1083.45	-2.99145	0	0	0	0	0	0	0				0	651.838	305.592	0	0	0	0	0	0	0	0
	2046	0	0	0	0	0	0	0	0	0	0	0				0	0	0	1088.13	-3.09048	0	0	0	0	0	0	0				0	663.732	313.779	0	0	0	0	0	0	0	0
	2047	0	0	0	0	0	0	0	0	0	0	0				0	0	0	1092.82	-3.1895	0	0	0	0	0	0	0				0	675.626	321.966	0	0	0	0	0	0	0	0
	2048	0	0	0	0	0	0	0	0	0	0	0				0	0	0	1097.51	-3.28853	0	0	0	0	0	0	0				0	687.521	330.153	0	0	0	0	0	0	0	0
	2049	0	0	0	0	0	0	0	0	0	0	0				0	0	0	1102.19	-3.38756	0	0	0	0	0	0	0				0	699.415	338.34	0	0	0	0	0	0	0	0
	2050	0	0	0	0	0	0	0	0	0	0	0				0	0	0	1106.88	-3.48658	0	0	0	0	0	0	0				0	711.309	346.527	0	0	0	0	0	0	0	0
	2051	0	0	0	0	0	0	0	0	0	0	0				0	0	0	1111.56	-3.58561	0	0	0	0	0	0	0				0	723.203	354.714	0	0	0	0	0	0	0	0
	2052	0	0	0	0	0	0	0	0	0	0	0				0	0	0	1116.25	-3.68463	0	0	0	0	0	0	0				0	735.097	362.9	0	0	0	0	0	0	0	0
	2053	0	0	0	0	0	0	0	0	0	0	0				0	0	0	1120.94	-3.78366	0	0	0	0	0	0	0				0	746.992	371.087	0	0	0	0	0	0	0	0
	2054	0	0	0	0	0	0	0	0	0	0	0				0	0	0	1125.62	-3.88269	0	0	0	0	0	0	0				0	758.886	379.274	0	0	0	0	0	0	0	0
	2055	0	0	0	0	0	0	0	0	0	0	0				0	0	0	1130.31	-3.98171	0	0	0	0	0	0	0				0	770.78	387.461	0	0	0	0	0	0	0	0
	2056	0	0	0	0	0	0	0	0	0	0	0				0	0	0	1134.99	-4.08074	0	0	0	0	0	0	0				0	782.674	395.648	0	0	0	0	0	0	0	0
	2057	0	0	0	0	0	0	0	0	0	0	0				0	0	0	1139.68	-4.17976	0	0	0	0	0	0	0				0	794.568	403.835	0	0	0	0	0	0	0	0
	2058	0	0	0	0	0	0	0	0	0	0	0				0	0	0	1144.37	-4.27879	0	0	0	0	0	0	0				0	806.462	412.022	0	0	0	0	0	0	0	0
	2059	0	0	0	0	0	0	0	0	0	0	0				0	0	0	1149.05	-4.37782	0	0	0	0	0	0	0				0	818.357	420.209	0	0	0	0	0	0	0	0
	2060	0	0	0	0	0	0	0	0	0	0	0				0	0	0	1153.74	-4.47684	0	0	0	0	0	0	0				0	830.251	428.396	0	0	0	0	0	0	0	0
	©2001-2009 Clean Air-Cool Planet, Inc. All rights reserved
[truncated: 58 more columns]

## Sheet: S_N2O
	On this Worksheet: N2O emissions from all sources. These numbers are the product of the emission factor and the input data. Some sources have no formulas because they have no CO2 emissions, but are included to keep formatting consistent.
	MODULE	Summary
	WORKSHEET	N2O
	UNIVERSITY	Please enter university name on 'Introduction' sheet
		--- Scope 1 Emissions Sources ---
		On-Campus Stationary Sources																														Direct Transportation Sources										Refrigerants & Chemicals						Agriculture Sources
	Fiscal Year	On-Campus Cogeneration Plant(s)															Other On-Campus Stationary Sources															University Fleet										Refrigerants & Chemicals						Fertilizer
		Residual Oil (#5-6)	Distillate Oil (#1-4)	Natural Gas	LPG (Propane)	Coal (Steam Coal)	Incinerated Waste	Wood Chips	Wood Pellets	Grass Pellets	Residual BioHeat	Distillate BioHeat	Attributable Solar - Electric	Attributable Solar - Thermal	Attributable Wind	Other	Residual Oil (#5-6)	Distillate Oil (#1-4)	Natural Gas	LPG (Propane)	Coal (Steam Coal)	Incinerated Waste	Wood Chips	Wood Pellets	Grass Pellets	Residual BioHeat	Distillate BioHeat	Attributable Solar - Electric	Attributable Solar - Thermal	Attributable Wind	Other	Gasoline Fleet	Diesel Fleet	Natural Gas Fleet	E85 Fleet	B5 Fleet	B20 Fleet	B100	Hydrogen	Other Fleet Fuel	Electric Fleet	HFC-134a	HFC-404a	HCFC-22	HCFE-235da2	HG-10	Other	Synthetic	Organic
		kg N2O	kg N2O	kg N2O	kg N2O	kg N2O	kg N2O	kg N2O	kg N2O	kg N2O	kg N2O	kg N2O	kWh	MMBtu	kWh	kg N2O	kg N2O	kg N2O	kg N2O	kg N2O	kg N2O	kg N2O	kg N2O	kg N2O	kg N2O	kg N2O	kg N2O	kWh	MMBtu	kWh	kg N2O	kg N2O	kg N2O	kg N2O	kg N2O	kg N2O	kg N2O	kg N2O	kg N2O	kg N2O	kg N2O	kg N2O	kg N2O	kg N2O	kg N2O	kg N2O	kg N2O	kg N2O	kg N2O
	1990	0	0	0	0	0	0	0	0	0	0	0				0	0	0	0	0	0	0	0	0	0	0	0				0	0	0	0	0	0	0	0	0	0	0							0	0
	1991	0	0	0	0	0	0	0	0	0	0	0				0	0	0	0	0	0	0	0	0	0	0	0				0	0	0	0	0	0	0	0	0	0	0							0	0
	1992	0	0	0	0	0	0	0	0	0	0	0				0	0	0	0	0	0	0	0	0	0	0	0				0	0	0	0	0	0	0	0	0	0	0							0	0
	1993	0	0	0	0	0	0	0	0	0	0	0				0	0	0	0	0	0	0	0	0	0	0	0				0	0	0	0	0	0	0	0	0	0	0							0	0
	1994	0	0	0	0	0	0	0	0	0	0	0				0	0	0	0	0	0	0	0	0	0	0	0				0	0	0	0	0	0	0	0	0	0	0							0	0
	1995	0	0	0	0	0	0	0	0	0	0	0				0	0	0	0	0	0	0	0	0	0	0	0				0	0	0	0	0	0	0	0	0	0	0							0	0
	1996	0	0	0	0	0	0	0	0	0	0	0				0	0	0	0	0	0	0	0	0	0	0	0				0	0	0	0	0	0	0	0	0	0	0							0	0
	1997	0	0	0	0	0	0	0	0	0	0	0				0	0	0	0	0	0	0	0	0	0	0	0				0	0	0	0	0	0	0	0	0	0	0							0	0
	1998	0	0	0	0	0	0	0	0	0	0	0				0	0	0	0	0	0	0	0	0	0	0	0				0	0	0	0	0	0	0	0	0	0	0							0	0
	1999	0	0	0	0	0	0	0	0	0	0	0				0	0	0	0	0	0	0	0	0	0	0	0				0	0	0	0	0	0	0	0	0	0	0							0	0
	2000	0	0	0	0	0	0	0	0	0	0	0				0	0	0	0	0	0	0	0	0	0	0	0				0	0	0	0	0	0	0	0	0	0	0							0	0
	2001	0	0	0	0	0	0	0	0	0	0	0				0	0	0	0	0	0	0	0	0	0	0	0				0	0	0	0	0	0	0	0	0	0	0							0	0
	2002	0	0	0	0	0	0	0	0	0	0	0				0	0	0	0	0	0	0	0	0	0	0	0				0	0	0	0	0	0	0	0	0	0	0							0	0
	2003	0	0	0	0	0	0	0	0	0	0	0				0	0	0	0	0	0	0	0	0	0	0	0				0	0	0	0	0	0	0	0	0	0	0							0	0
	2004	0	0	0	0	0	0	0	0	0	0	0				0	0	0	0	0	0	0	0	0	0	0	0				0	0	0	0	0	0	0	0	0	0	0							0	0
	2005	0	0	0	0	0	0	0	0	0	0	0				0	0	0	0	0	0	0	0	0	0	0	0				0	0	0	0	0	0	0	0	0	0	0							0	0
	2006	0	0	0	0	0	0	0	0	0	0	0				0	0	0	0	0	0	0	0	0	0	0	0				0	0	0	0	0	0	0	0	0	0	0							0	0
	2007	0	0	0	0	0	0	0	0	0	0	0				0	0	0	18.1438	0	0	0	0	0	0	0	0				0	66.0198	0	0	0	0	0	0	0	0	0							37.1578	32.7963
	2008	0	0	0	0	0	0	0	0	0	0	0				0	0	0	0	0	0	0	0	0	0	0	0				0	0	0	0	0	0	0	0	0	0	0							0	0
	2009	0	0	0	0	0	0	0	0	0	0	0				0	0	0	17.7227	0	0	0	0	0	0	0	0				0	73.5111	12.2944	0	0	0	0	0	0	0	0							37.1578	32.7963
	2010	0	0	0	0	0	0	0	0	0	0	0				0	0	0	0	0	0	0	0	0	0	0	0				0	0	0	0	0	0	0	0	0	0	0							0	0
	2011	0	0	0	0	0	0	0	0	0	0	0				0	0	0	19.6538	0.0245062	0	0	0	0	0	0	0				0	85.935	4.66704	0	0	0	0	0	0	0	0							12.5966	0
	2012	0	0	0	0	0	0	0	0	0	0	0				0	0	0	18.3054	0.0126231	0	0	0	0	0	0	0				0	90.4061	1.92647	0	0	0	0	0	0	0	0							1.23085	3.94668
	2013	0	0	0	0	0	0	0	0	0	0	0				0	0	0	18.3054	0.0126231	0	0	0	0	0	0	0				0	85.935	34.2023	0	0	0	0	0	0	0	0							1.23085	3.94668
	2014	0	0	0	0	0	0	0	0	0	0	0				0	0	0	18.7636	0.00470105	0	0	0	0	0	0	0				0	94.6796	23.4774	0	0	0	0	0	0	0	0							-7.49166	4.82153
	2015	0	0	0	0	0	0	0	0	0	0	0				0	0	0	18.8573	-0.00124051	0	0	0	0	0	0	0				0	98.6573	27.1882	0	0	0	0	0	0	0	0							-14.4775	5.53732
	2016	0	0	0	0	0	0	0	0	0	0	0				0	0	0	18.9511	-0.00718206	0	0	0	0	0	0	0				0	102.635	30.899	0	0	0	0	0	0	0	0							-21.4432	6.25311
	2017	0	0	0	0	0	0	0	0	0	0	0				0	0	0	19.0448	-0.0131236	0	0	0	0	0	0	0				0	106.613	34.6099	0	0	0	0	0	0	0	0							-28.3888	6.9689
	2018	0	0	0	0	0	0	0	0	0	0	0				0	0	0	19.1385	-0.0190652	0	0	0	0	0	0	0				0	110.59	38.3207	0	0	0	0	0	0	0	0							-35.3143	7.68469
	2019	0	0	0	0	0	0	0	0	0	0	0				0	0	0	19.2322	-0.0250067	0	0	0	0	0	0	0				0	114.568	42.0316	0	0	0	0	0	0	0	0							-42.2197	8.40048
	2020	0	0	0	0	0	0	0	0	0	0	0				0	0	0	19.3259	-0.0309483	0	0	0	0	0	0	0				0	118.545	45.7424	0	0	0	0	0	0	0	0							-49.1051	9.11626
	2021	0	0	0	0	0	0	0	0	0	0	0				0	0	0	19.4197	-0.0368898	0	0	0	0	0	0	0				0	122.523	49.4532	0	0	0	0	0	0	0	0							-55.9703	9.83205
	2022	0	0	0	0	0	0	0	0	0	0	0				0	0	0	19.5134	-0.0428314	0	0	0	0	0	0	0				0	126.501	53.1641	0	0	0	0	0	0	0	0							-62.8155	10.5478
	2023	0	0	0	0	0	0	0	0	0	0	0				0	0	0	19.6071	-0.0487729	0	0	0	0	0	0	0				0	130.478	56.8749	0	0	0	0	0	0	0	0							-69.6406	11.2636
	2024	0	0	0	0	0	0	0	0	0	0	0				0	0	0	19.7008	-0.0547145	0	0	0	0	0	0	0				0	134.456	60.5858	0	0	0	0	0	0	0	0							-76.4456	11.9794
	2025	0	0	0	0	0	0	0	0	0	0	0				0	0	0	19.7945	-0.0606561	0	0	0	0	0	0	0				0	138.433	64.2966	0	0	0	0	0	0	0	0							-83.2305	12.6952
	2026	0	0	0	0	0	0	0	0	0	0	0				0	0	0	19.8883	-0.0665976	0	0	0	0	0	0	0				0	142.411	68.0074	0	0	0	0	0	0	0	0							-89.9953	13.411
	2027	0	0	0	0	0	0	0	0	0	0	0				0	0	0	19.982	-0.0725392	0	0	0	0	0	0	0				0	146.389	71.7183	0	0	0	0	0	0	0	0							-96.74	14.1268
	2028	0	0	0	0	0	0	0	0	0	0	0				0	0	0	20.0757	-0.0784807	0	0	0	0	0	0	0				0	150.366	75.4291	0	0	0	0	0	0	0	0							-103.465	14.8426
	2029	0	0	0	0	0	0	0	0	0	0	0				0	0	0	20.1694	-0.0844223	0	0	0	0	0	0	0				0	154.344	79.14	0	0	0	0	0	0	0	0							-110.169	15.5584
	2030	0	0	0	0	0	0	0	0	0	0	0				0	0	0	20.2631	-0.0903638	0	0	0	0	0	0	0				0	158.322	82.8508	0	0	0	0	0	0	0	0							-116.854	16.2742
	2031	0	0	0	0	0	0	0	0	0	0	0				0	0	0	20.3569	-0.0963054	0	0	0	0	0	0	0				0	162.299	86.5616	0	0	0	0	0	0	0	0							-123.518	16.9899
	2032	0	0	0	0	0	0	0	0	0	0	0				0	0	0	20.4506	-0.102247	0	0	0	0	0	0	0				0	166.277	90.2725	0	0	0	0	0	0	0	0							-130.162	17.7057
	2033	0	0	0	0	0	0	0	0	0	0	0				0	0	0	20.5443	-0.108188	0	0	0	0	0	0	0				0	170.254	93.9833	0	0	0	0	0	0	0	0							-136.787	18.4215
	2034	0	0	0	0	0	0	0	0	0	0	0				0	0	0	20.638	-0.11413	0	0	0	0	0	0	0				0	174.232	97.6942	0	0	0	0	0	0	0	0							-143.391	19.1373
	2035	0	0	0	0	0	0	0	0	0	0	0				0	0	0	20.7318	-0.120072	0	0	0	0	0	0	0				0	178.21	101.405	0	0	0	0	0	0	0	0							-149.975	19.8531
	2036	0	0	0	0	0	0	0	0	0	0	0				0	0	0	20.8255	-0.126013	0	0	0	0	0	0	0				0	182.187	105.116	0	0	0	0	0	0	0	0							-156.539	20.5689
	2037	0	0	0	0	0	0	0	0	0	0	0				0	0	0	20.9192	-0.131955	0	0	0	0	0	0	0				0	186.165	108.827	0	0	0	0	0	0	0	0							-163.082	21.2847
	2038	0	0	0	0	0	0	0	0	0	0	0				0	0	0	21.0129	-0.137896	0	0	0	0	0	0	0				0	190.143	112.538	0	0	0	0	0	0	0	0							-169.606	22.0005
	2039	0	0	0	0	0	0	0	0	0	0	0				0	0	0	21.1066	-0.143838	0	0	0	0	0	0	0				0	194.12	116.248	0	0	0	0	0	0	0	0							-176.11	22.7163
	2040	0	0	0	0	0	0	0	0	0	0	0				0	0	0	21.2004	-0.149779	0	0	0	0	0	0	0				0	198.098	119.959	0	0	0	0	0	0	0	0							-182.593	23.432
	2041	0	0	0	0	0	0	0	0	0	0	0				0	0	0	21.2941	-0.155721	0	0	0	0	0	0	0				0	202.075	123.67	0	0	0	0	0	0	0	0							-189.057	24.1478
	2042	0	0	0	0	0	0	0	0	0	0	0				0	0	0	21.3878	-0.161662	0	0	0	0	0	0	0				0	206.053	127.381	0	0	0	0	0	0	0	0							-195.5	24.8636
	2043	0	0	0	0	0	0	0	0	0	0	0				0	0	0	21.4815	-0.167604	0	0	0	0	0	0	0				0	210.031	131.092	0	0	0	0	0	0	0	0							-201.924	25.5794
	2044	0	0	0	0	0	0	0	0	0	0	0				0	0	0	21.5752	-0.173546	0	0	0	0	0	0	0				0	214.008	134.803	0	0	0	0	0	0	0	0							-208.327	26.2952
	2045	0	0	0	0	0	0	0	0	0	0	0				0	0	0	21.669	-0.179487	0	0	0	0	0	0	0				0	217.986	138.513	0	0	0	0	0	0	0	0							-214.71	27.011
	2046	0	0	0	0	0	0	0	0	0	0	0				0	0	0	21.7627	-0.185429	0	0	0	0	0	0	0				0	221.964	142.224	0	0	0	0	0	0	0	0							-221.073	27.7268
	2047	0	0	0	0	0	0	0	0	0	0	0				0	0	0	21.8564	-0.19137	0	0	0	0	0	0	0				0	225.941	145.935	0	0	0	0	0	0	0	0							-227.416	28.4426
	2048	0	0	0	0	0	0	0	0	0	0	0				0	0	0	21.9501	-0.197312	0	0	0	0	0	0	0				0	229.919	149.646	0	0	0	0	0	0	0	0							-233.739	29.1584
	2049	0	0	0	0	0	0	0	0	0	0	0				0	0	0	22.0438	-0.203253	0	0	0	0	0	0	0				0	233.896	153.357	0	0	0	0	0	0	0	0							-240.042	29.8742
	2050	0	0	0	0	0	0	0	0	0	0	0				0	0	0	22.1376	-0.209195	0	0	0	0	0	0	0				0	237.874	157.068	0	0	0	0	0	0	0	0							-246.324	30.5899
	2051	0	0	0	0	0	0	0	0	0	0	0				0	0	0	22.2313	-0.215136	0	0	0	0	0	0	0				0	241.852	160.778	0	0	0	0	0	0	0	0							-252.587	31.3057
	2052	0	0	0	0	0	0	0	0	0	0	0				0	0	0	22.325	-0.221078	0	0	0	0	0	0	0				0	245.829	164.489	0	0	0	0	0	0	0	0							-258.829	32.0215
	2053	0	0	0	0	0	0	0	0	0	0	0				0	0	0	22.4187	-0.22702	0	0	0	0	0	0	0				0	249.807	168.2	0	0	0	0	0	0	0	0							-265.052	32.7373
	2054	0	0	0	0	0	0	0	0	0	0	0				0	0	0	22.5124	-0.232961	0	0	0	0	0	0	0				0	253.785	171.911	0	0	0	0	0	0	0	0							-271.254	33.4531
	2055	0	0	0	0	0	0	0	0	0	0	0				0	0	0	22.6062	-0.238903	0	0	0	0	0	0	0				0	257.762	175.622	0	0	0	0	0	0	0	0							-277.436	34.1689
	2056	0	0	0	0	0	0	0	0	0	0	0				0	0	0	22.6999	-0.244844	0	0	0	0	0	0	0				0	261.74	179.333	0	0	0	0	0	0	0	0							-283.598	34.8847
	2057	0	0	0	0	0	0	0	0	0	0	0				0	0	0	22.7936	-0.250786	0	0	0	0	0	0	0				0	265.717	183.043	0	0	0	0	0	0	0	0							-289.74	35.6005
	2058	0	0	0	0	0	0	0	0	0	0	0				0	0	0	22.8873	-0.256727	0	0	0	0	0	0	0				0	269.695	186.754	0	0	0	0	0	0	0	0							-295.862	36.3163
	2059	0	0	0	0	0	0	0	0	0	0	0				0	0	0	22.981	-0.262669	0	0	0	0	0	0	0				0	273.673	190.465	0	0	0	0	0	0	0	0							-301.964	37.032
	2060	0	0	0	0	0	0	0	0	0	0	0				0	0	0	23.0748	-0.26861	0	0	0	0	0	0	0				0	277.65	194.176	0	0	0	0	0	0	0	0							-308.046	37.7478
	©2001-2009 Clean Air-Cool Planet, Inc. All rights reserved
[truncated: 58 more columns]

[truncated: 96 more sheets: S_Energy, S_CO2_Sum, S_CH4_Sum, S_N2O_Sum, S_Energy_Sum, S_eCO2_Sum, S_Annual, S_Demo, ACUPCC_Reporting, GraphControl, Linear Projection, Normalization, Customized trends, Detailed Projection, Project_Input, P_Cost_Ass, Project_EF, P_Emissions_Calc, P_Source_Increases, P_Source_Reductions …]
