# Supplementary material
Source: MDPI journal article supplement (https://www.mdpi.com/2071-1050/8/1/80)
Supplement: s1 [file s1 › final graphs.xlsx]

## Sheet: Sheet1
Fiscal Year	Operating Budget	Energy Budget	Full Time Students	Faculty	Staff	Total Building Space
	$ (2005)	$ (2005)	FTE	FTE	FTE	Square Feet
2008	7.7147e+07	2.8576e+06	4482	469	495	1148312
2013	1.26055e+08	2.08247e+06	4308	201	482	1353132

## Sheet: Sheet2
Year	Gasoline Fleet	Diesel Fleet	Other Fleet Fuel
2008	15446	613	784
2013	15645	2273	79

## Sheet: Sheet3
Year	HCFC-22	R410a	Isceon MO99
2008	60
2013	120	125	275

## Sheet: Sheet4
	2008	2013
Other On-Campus Stationary	1968.95	2223.75
Direct Transportation	196.17	170.816
Refrigerants & Chemicals	49.2601	432.081
Agriculture	1.90842	6.57542

## Sheet: Sheet5
	Year	Scope 2 Emissions
	2008	10194
	2013	9305.7

## Sheet: Sheet6
	Institutional Data					Proportion of Transporation Methods					Average Distance Travelled by Method in Miles
	User	Commuters	One-Way Trips / Week	Total Trips / Week	Weeks / Year	Bike	Walk	Drive Alone	Carpool	Bus	Bike	Walk	Drive Alone	Carpool	Bus
	Students	2703	10	27030	32	0.025	0.325	0.6	0.025	0.025	2	0.5	11.7196	11.7196	5
	Faculty	436	10	4360	45	0.03	0.28	0.64	0.02	0.03	2	1	10.55	10.55	5
						Proportion of Transporation Methods
						Bike	Walk	Drive Alone	Carpool	Bus
						0.025	0.325	0.6	0.025	0.025

## Sheet: Sheet7
	Faculty / Staff Commuting	Student Commuting	Study Abroad Air Travel	Solid Waste	Wastewater	Paper	Scope 2 T&D Losses	Offsets
2008	N/A	N/A	N/A	3313.9	15.6843	N/A	1008.2	-3703
2013	515.94	2371.97	1555.02	995.487	14.5066	29.5396	920.344	-3703

## Sheet: Sheet8
	Scope 1	Scope 2	Scope 3	All Scopes
2008	2216.29	10194	4337.78	16748.1
2013	2833.23	9305.7	6402.81	18541.7

## Sheet: Sheet9
		Total FTE (students + staff/fac)	Total Building Area	Year 1st sustainability position established	Research?
	Austin College	1650	803474	2011	No
	St. Edward's University	4991	1353132	2010	No
	Rice University	9116	5930533	2004	Yes
	University of North Texas	33157	6870000	2009	Yes
	Texas Tech University	39500	8400000	2009	Yes
	UT Soutwestern Medical Center	16700	11000000	2012	Yes
	University of Houston	46000	11400000	2012	Yes
	Texas A&M	61972	22692719	2008	Yes
	University of Texas - Austin	65800.9	22914891	2009	Yes

## Sheet: Sheet10
		Total Emissions - offsets
	Austin College	7743.2
	St. Edward's University	9356.1
	Rice University	32393
	University of North Texas	81308.7
	Texas Tech University	265638
	UT Soutwestern Medical Center	289486
	University of Houston	176072
	Texas A&M	306321
	University of Texas - Austin	258143

[truncated: 5 more sheets: Sheet11, Sheet12, Sheet13, Sheet14, Sheet15]
